# Supplementary material
Source: PubMed Central journal article supplement (PMC11017302)

# sanjuan incidence

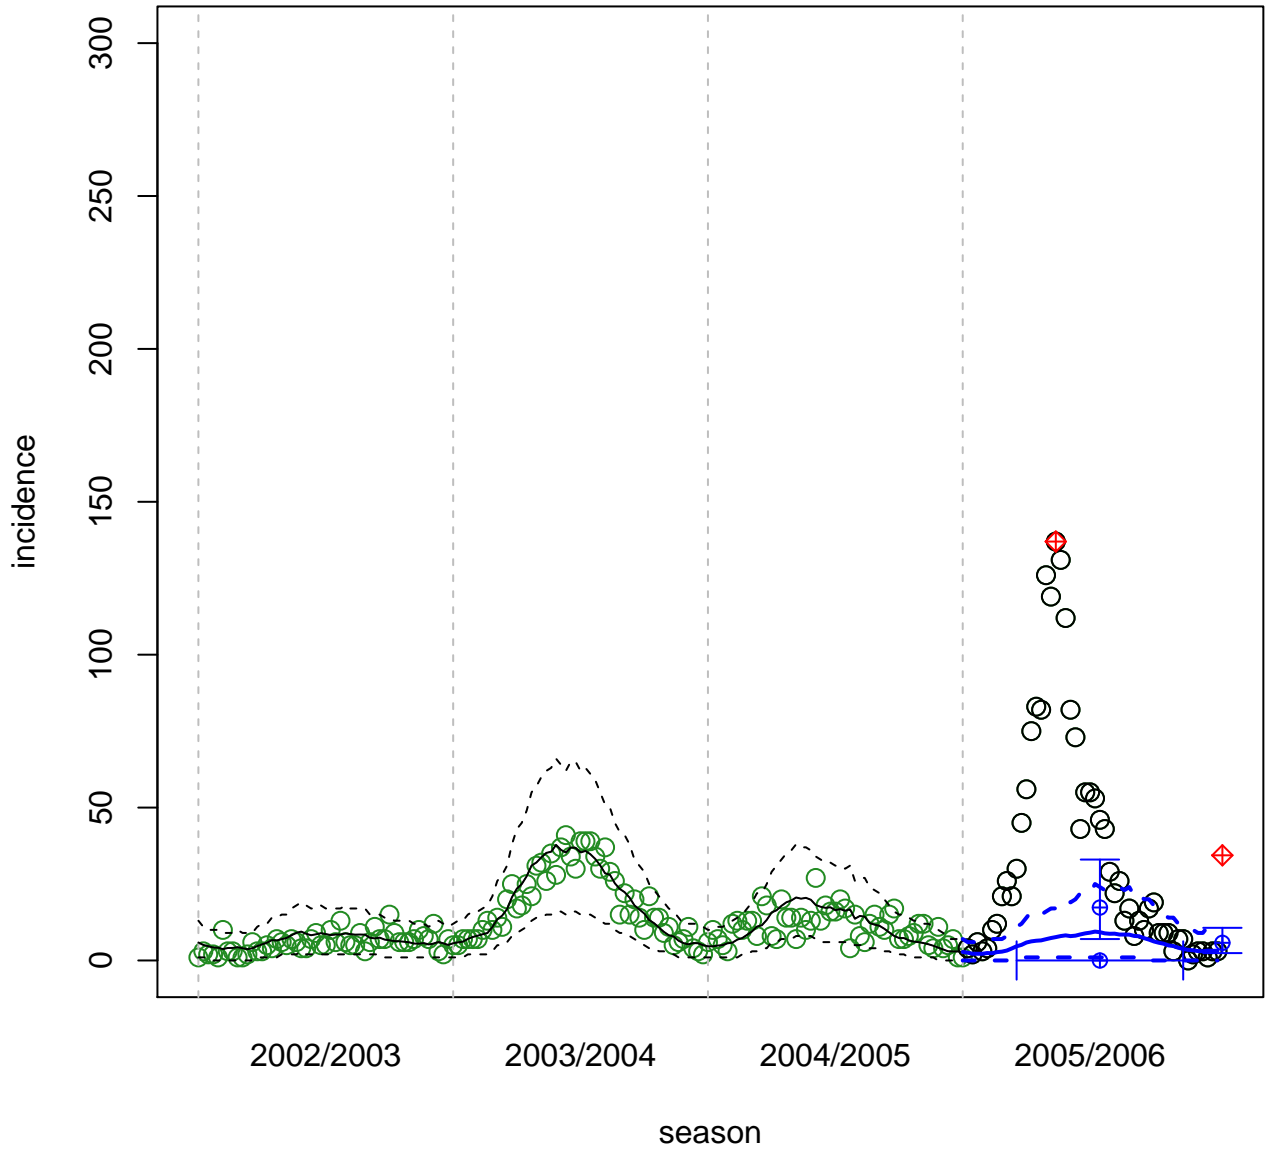

# sanjuan incidence

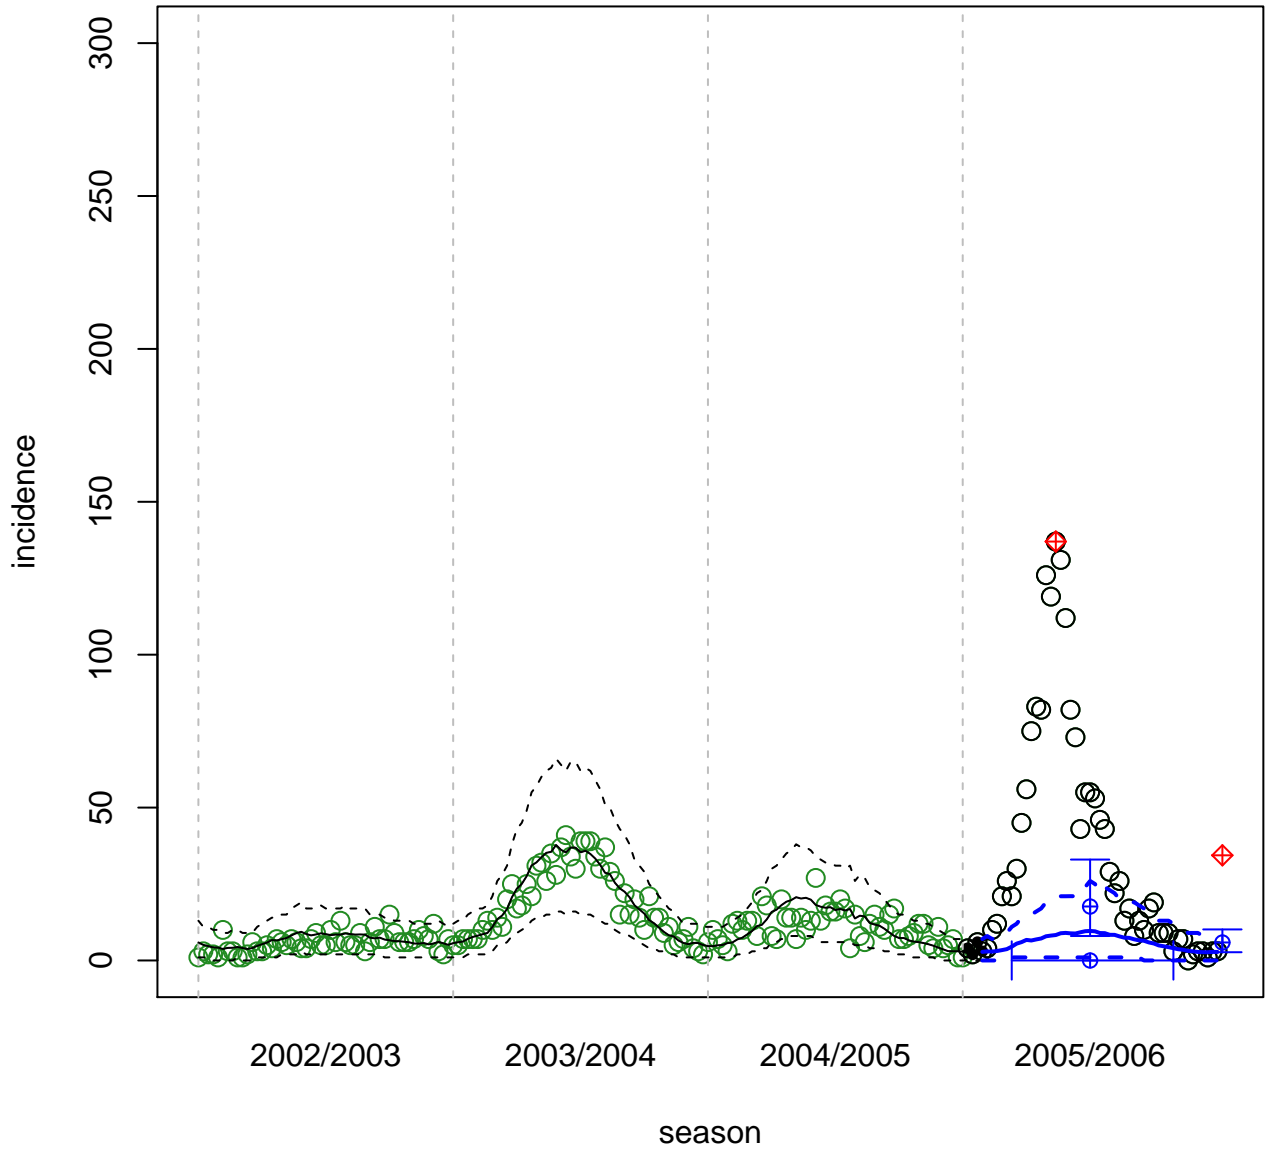

# sanjuan incidence

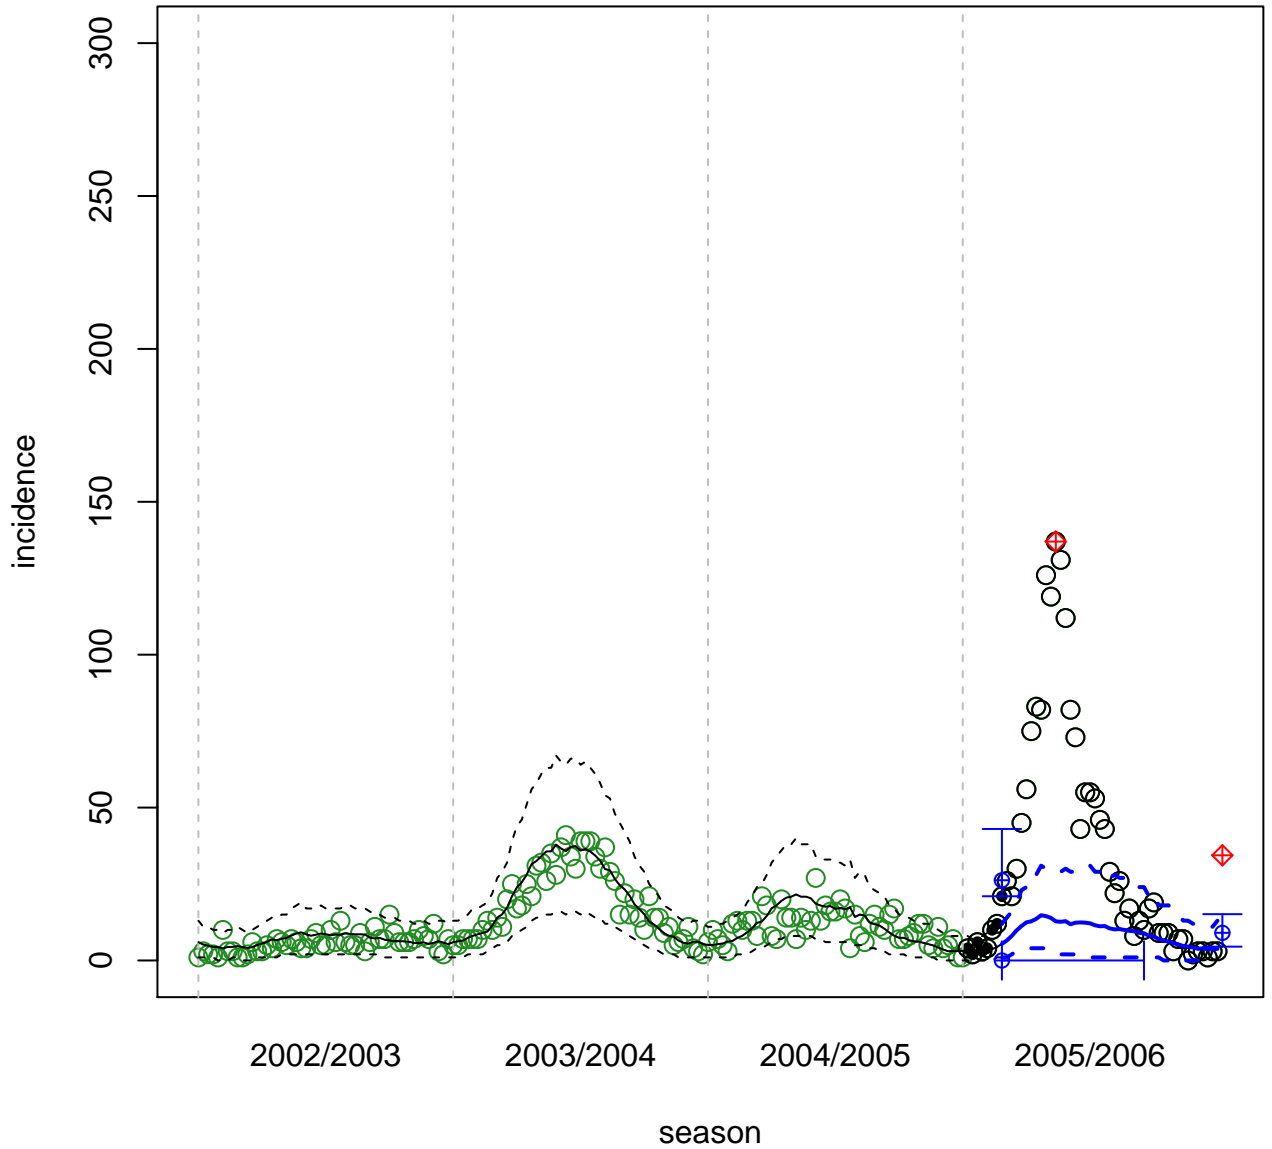

# sanjuan incidence

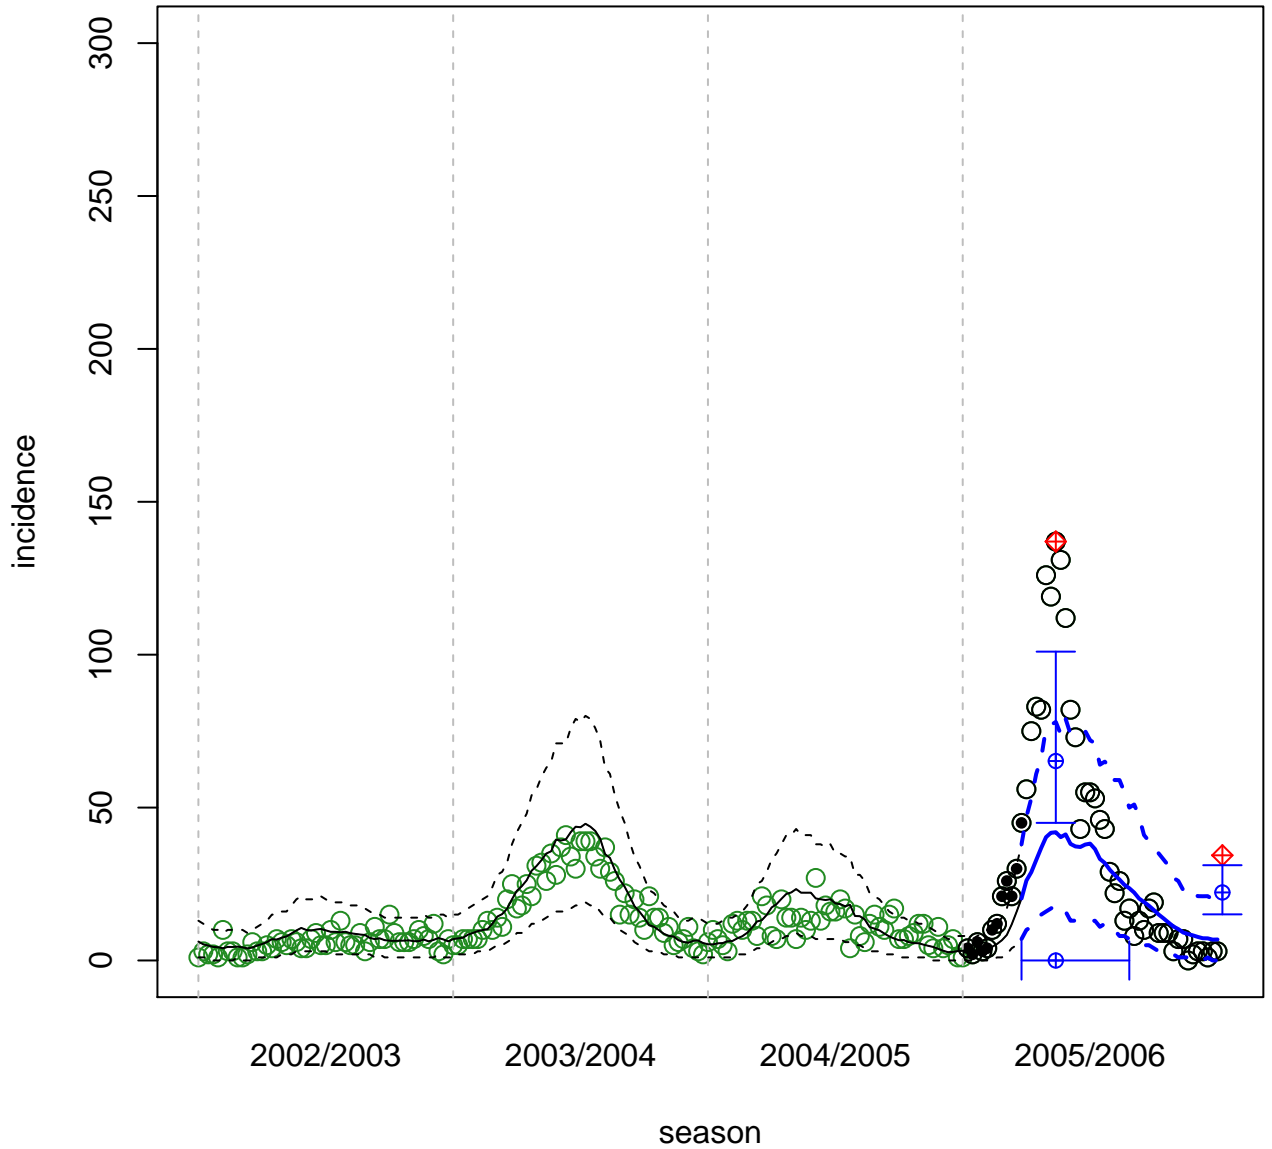

# sanjuan incidence

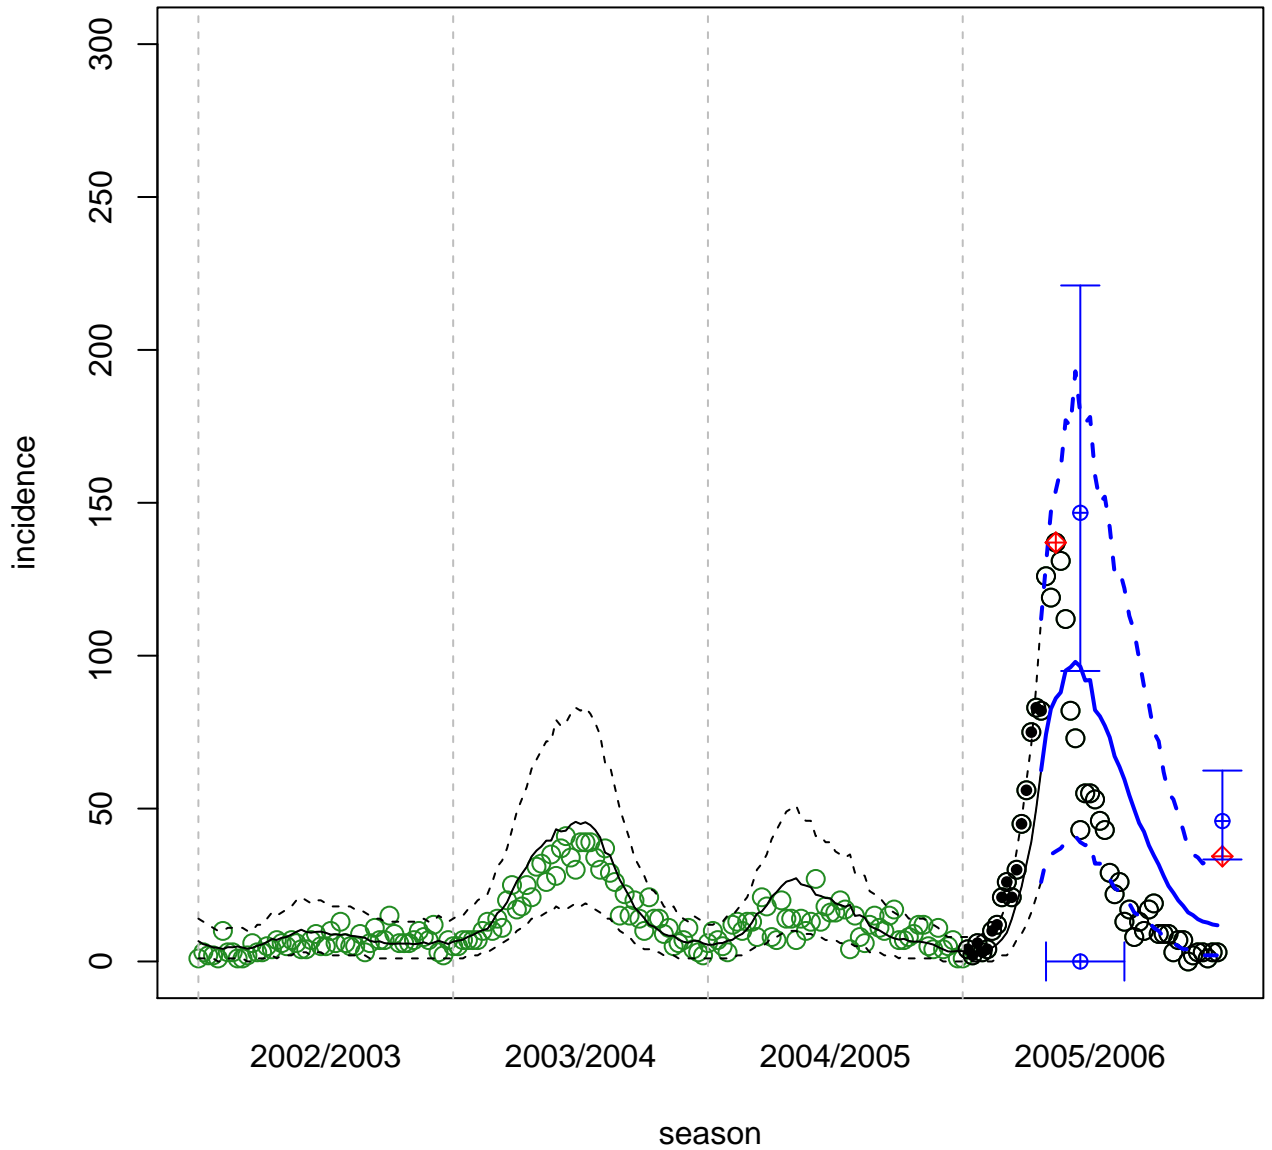

# sanjuan incidence

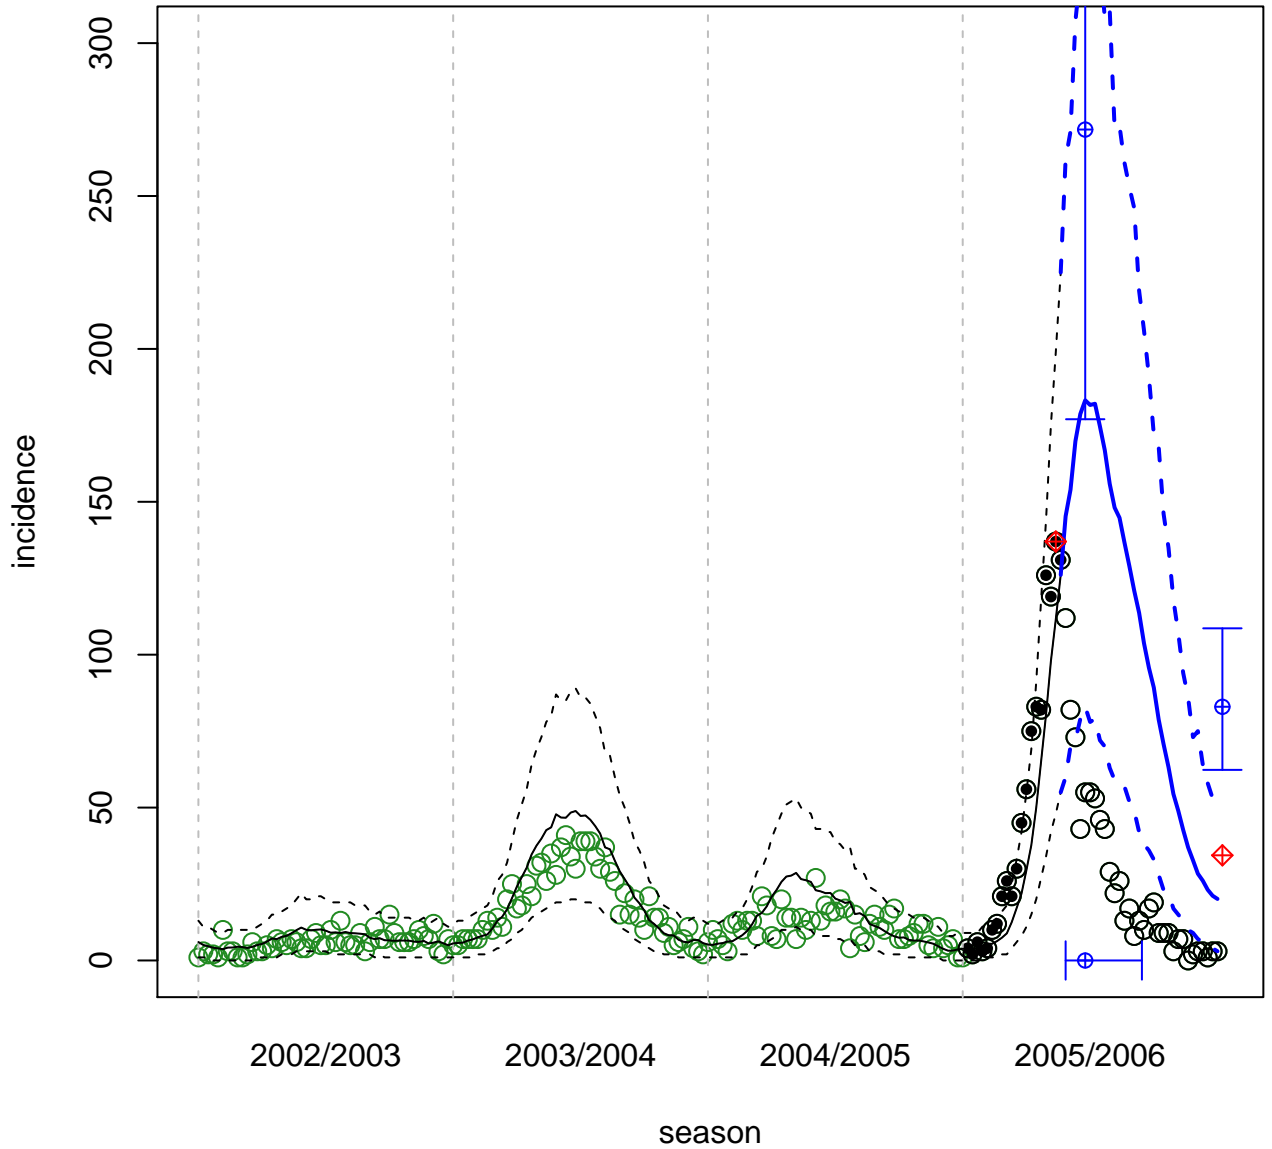

# sanjuan incidence

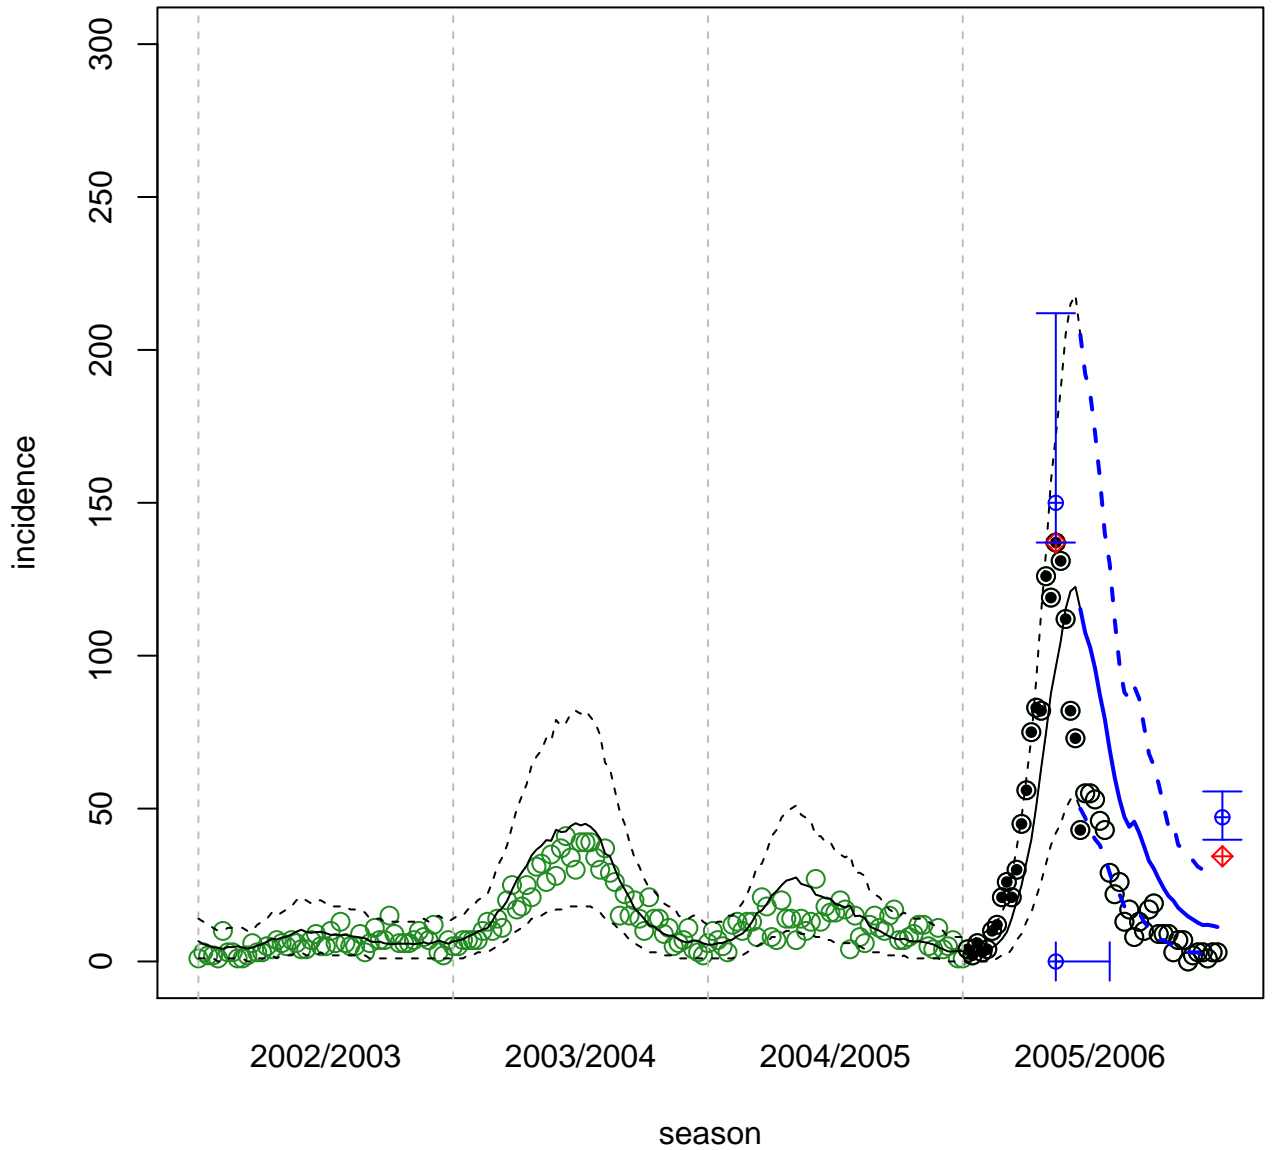

# sanjuan incidence

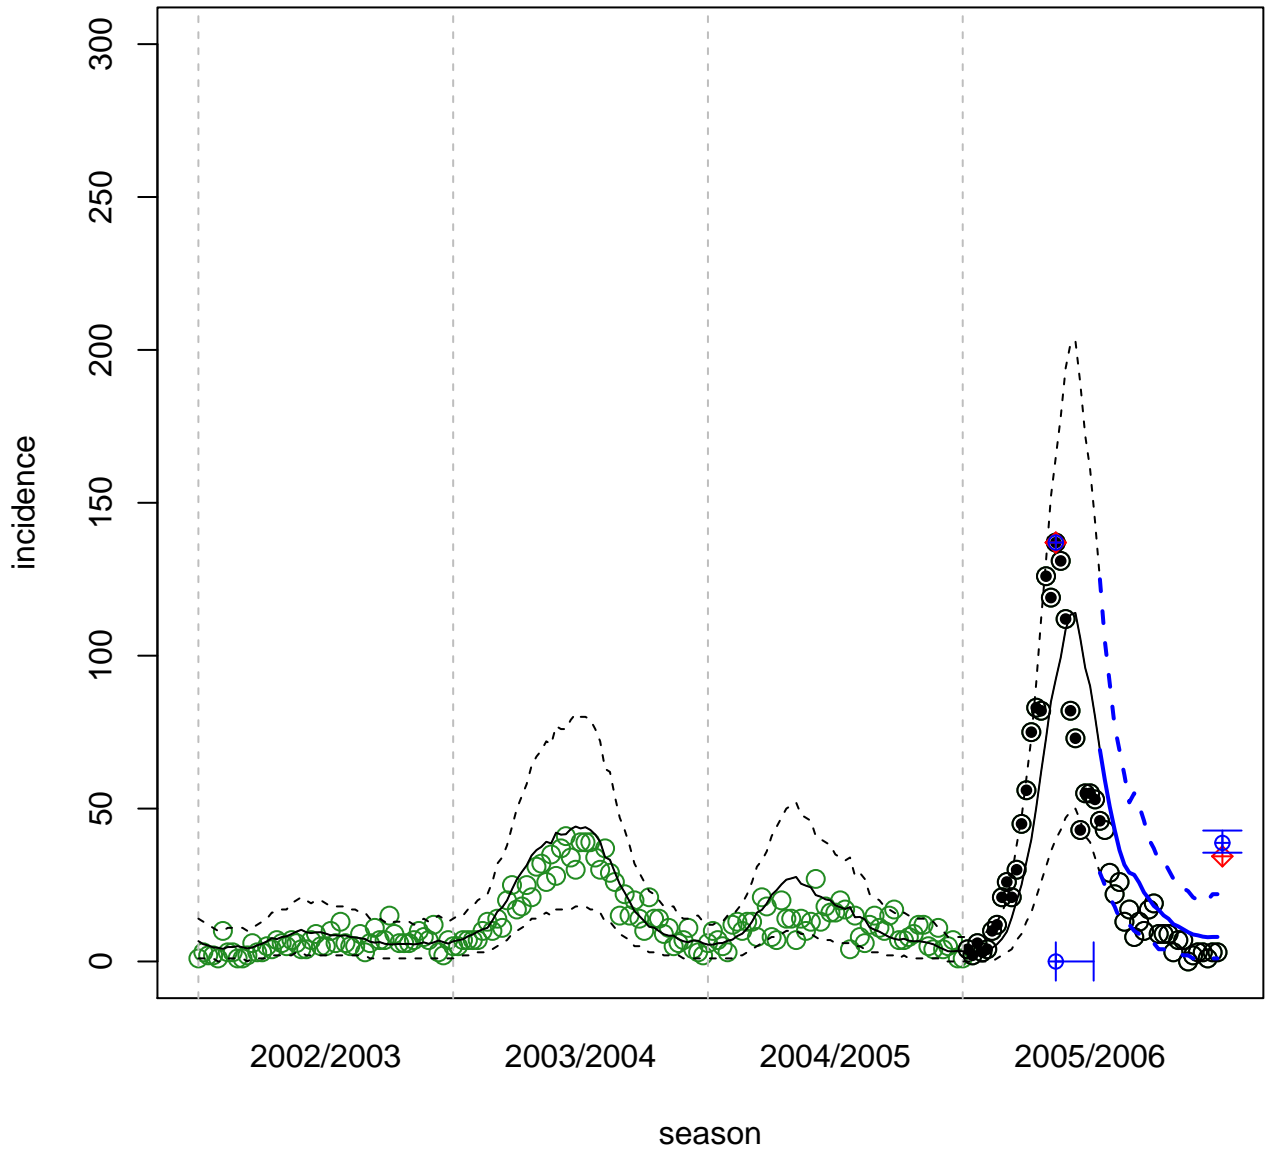



# sanjuan incidence

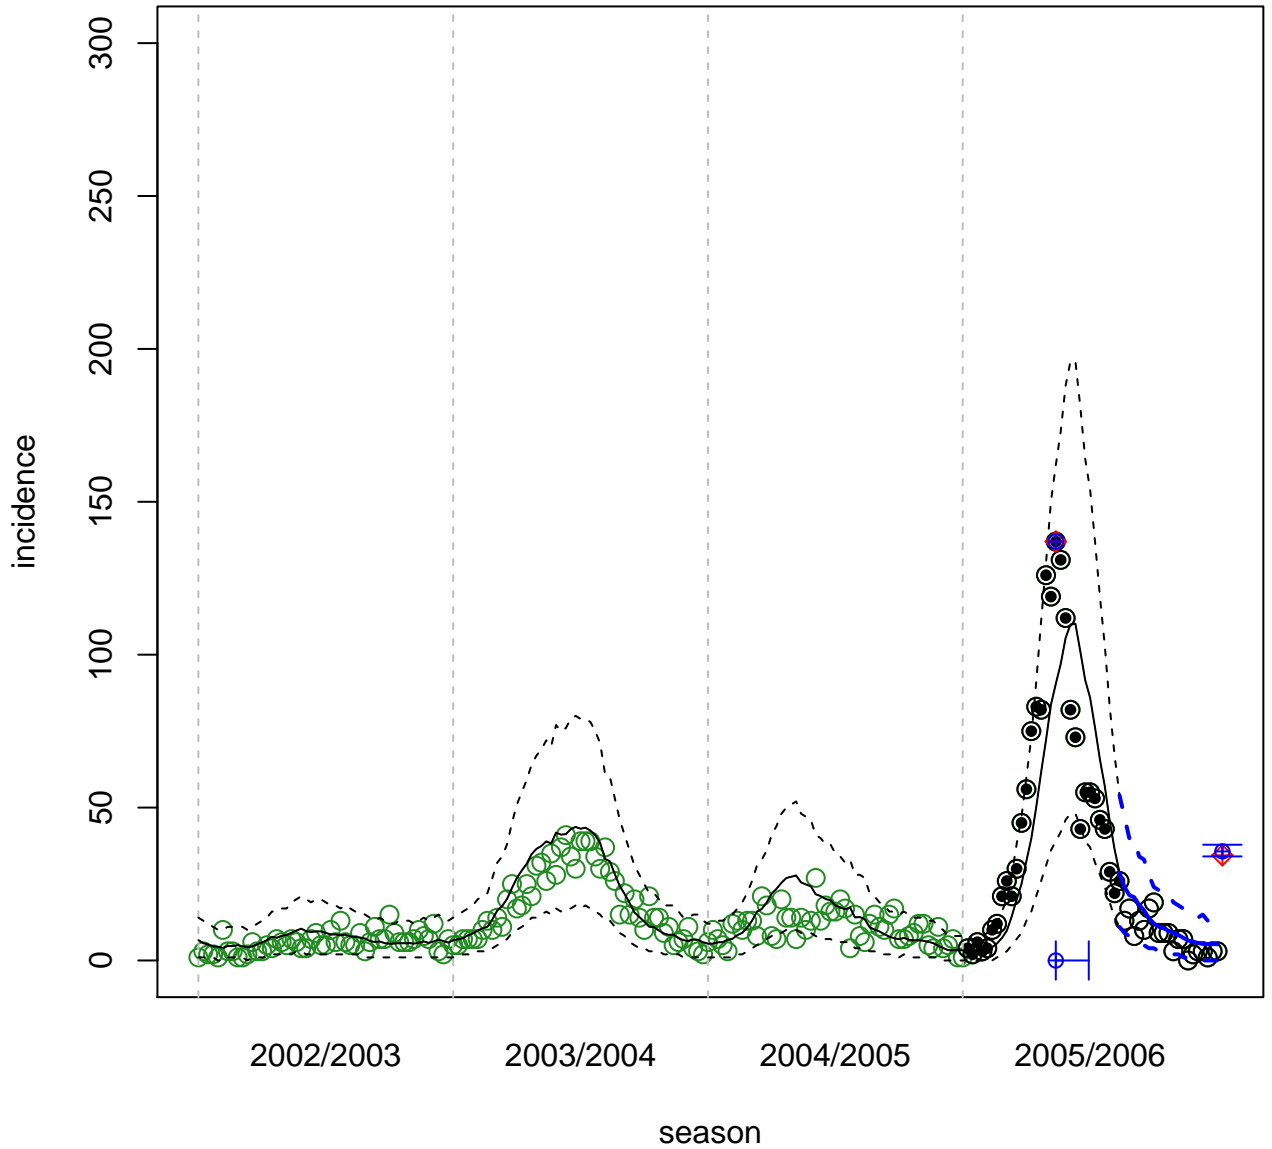

# sanjuan incidence

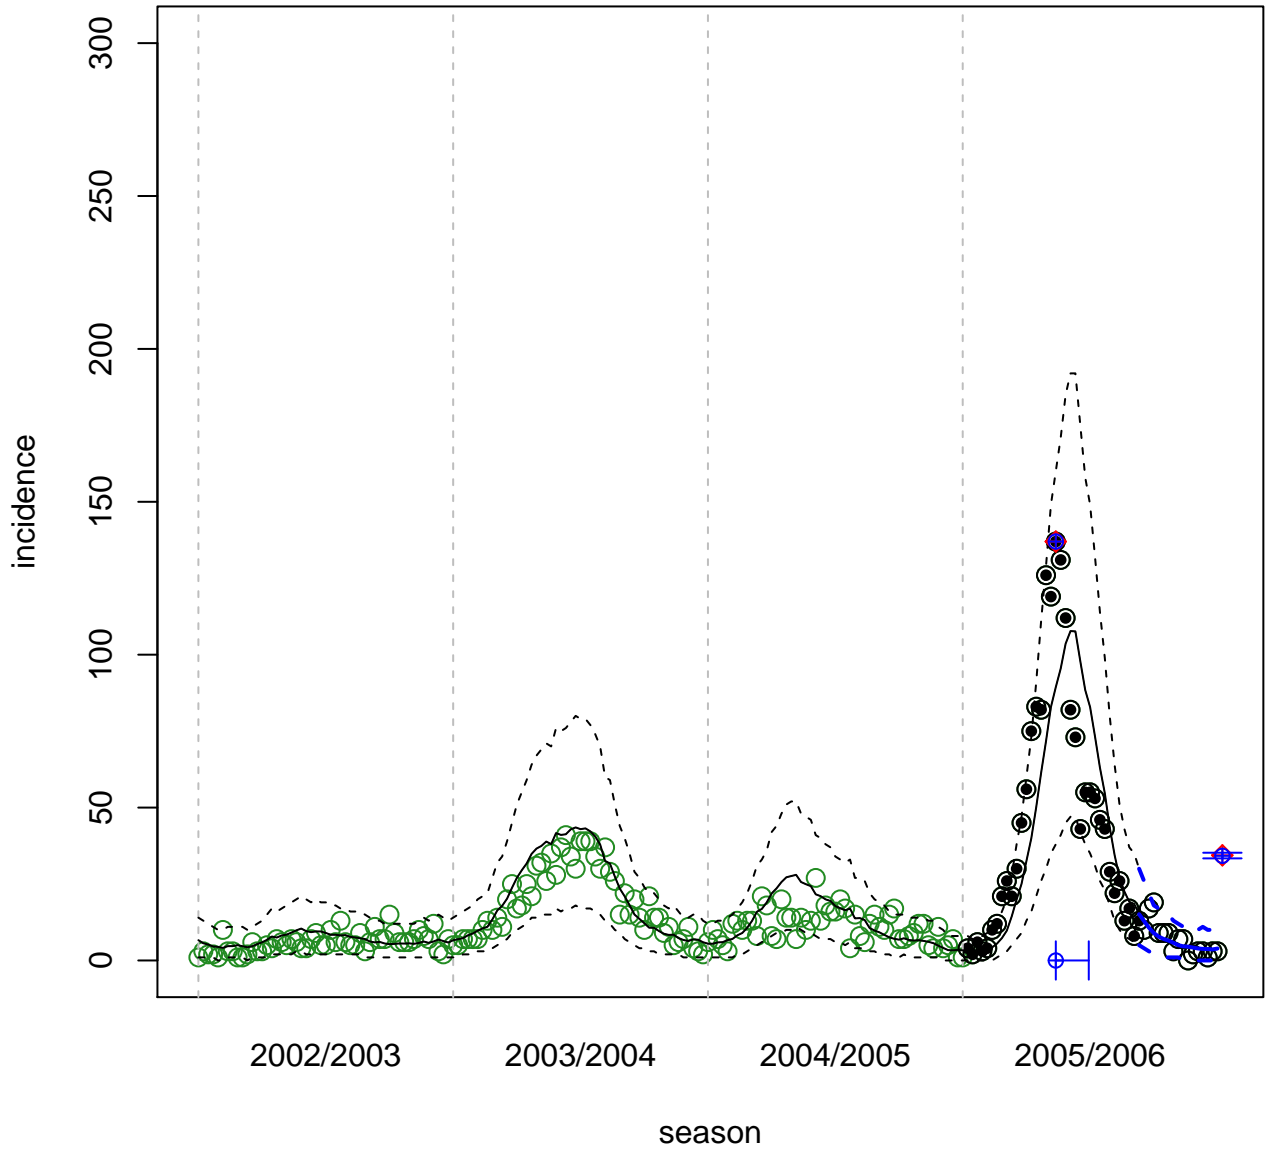

# sanjuan incidence

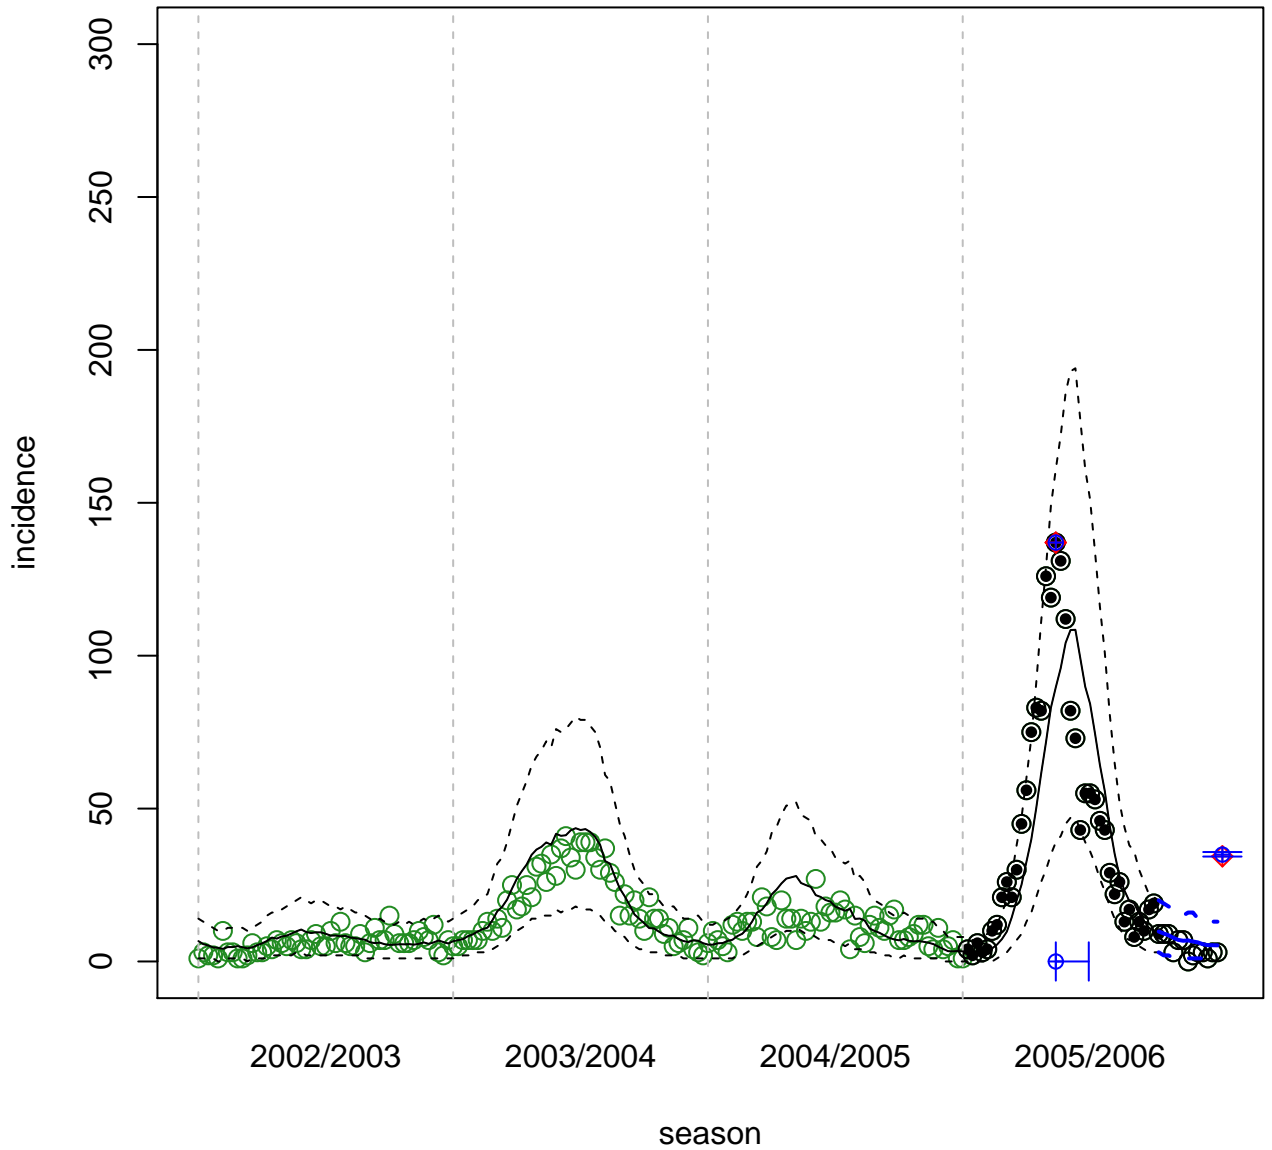

# sanjuan incidence

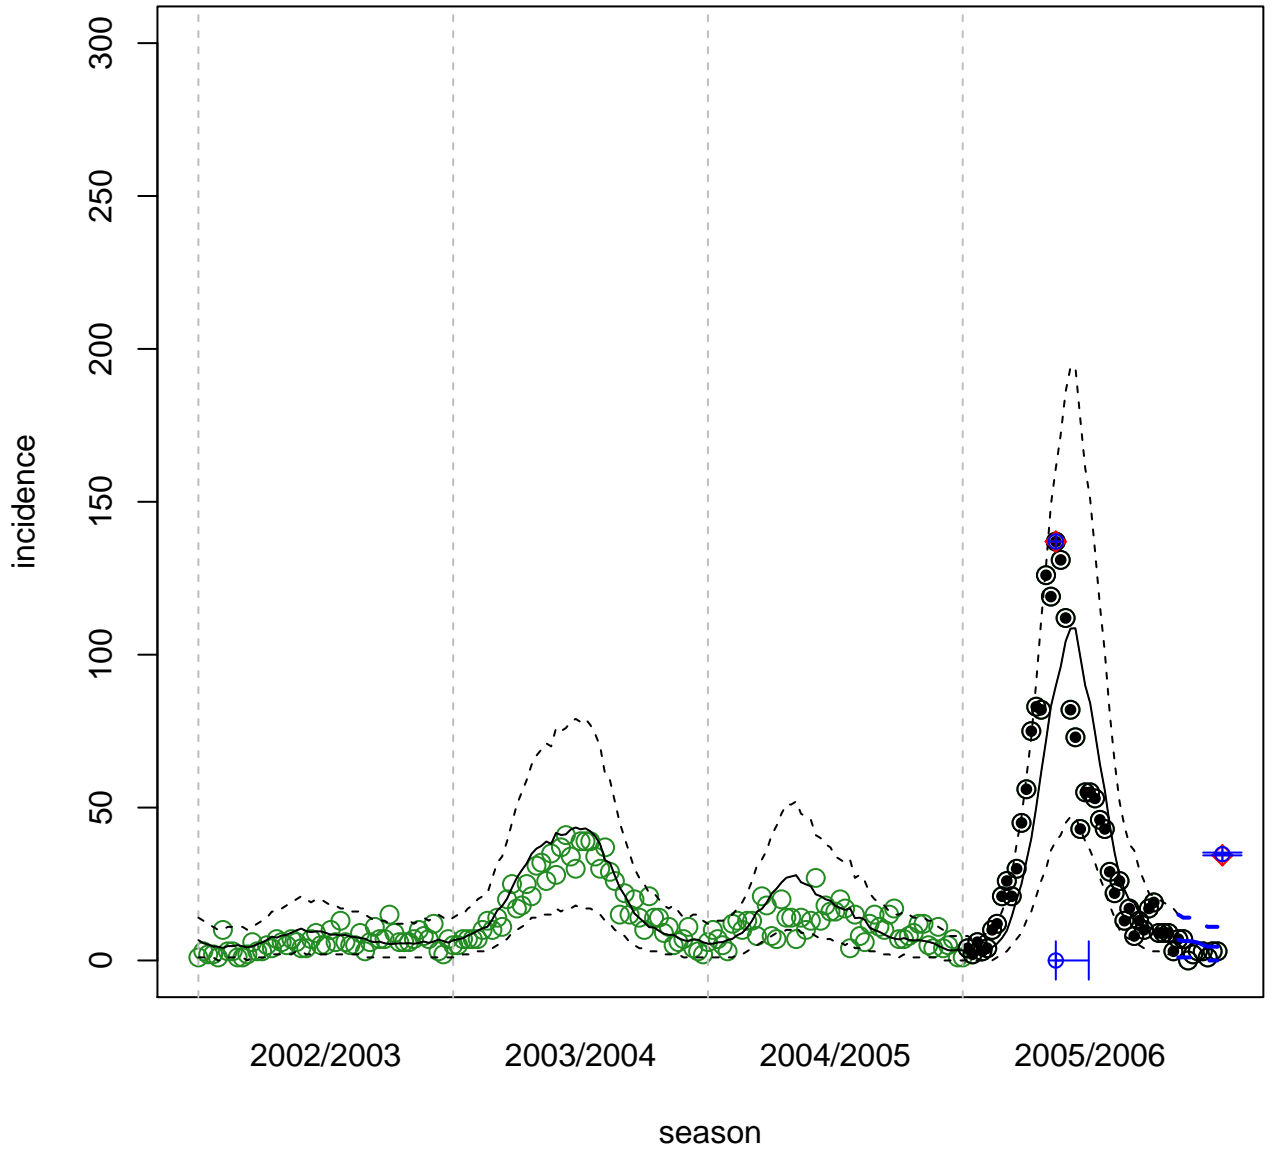



# sanjuan incidence

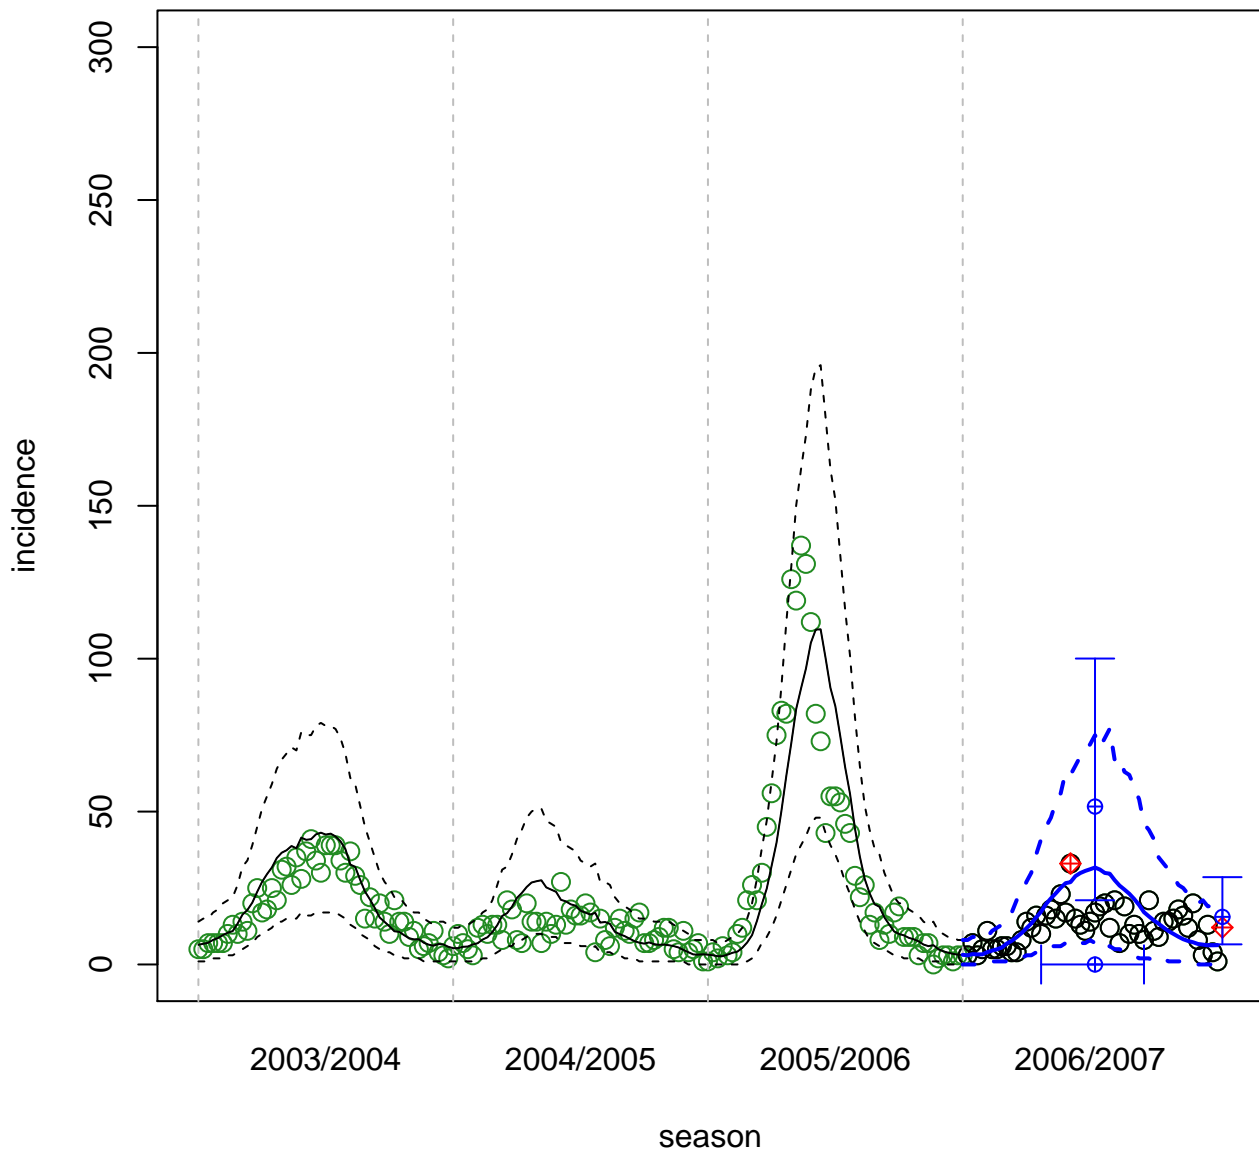

# sanjuan incidence

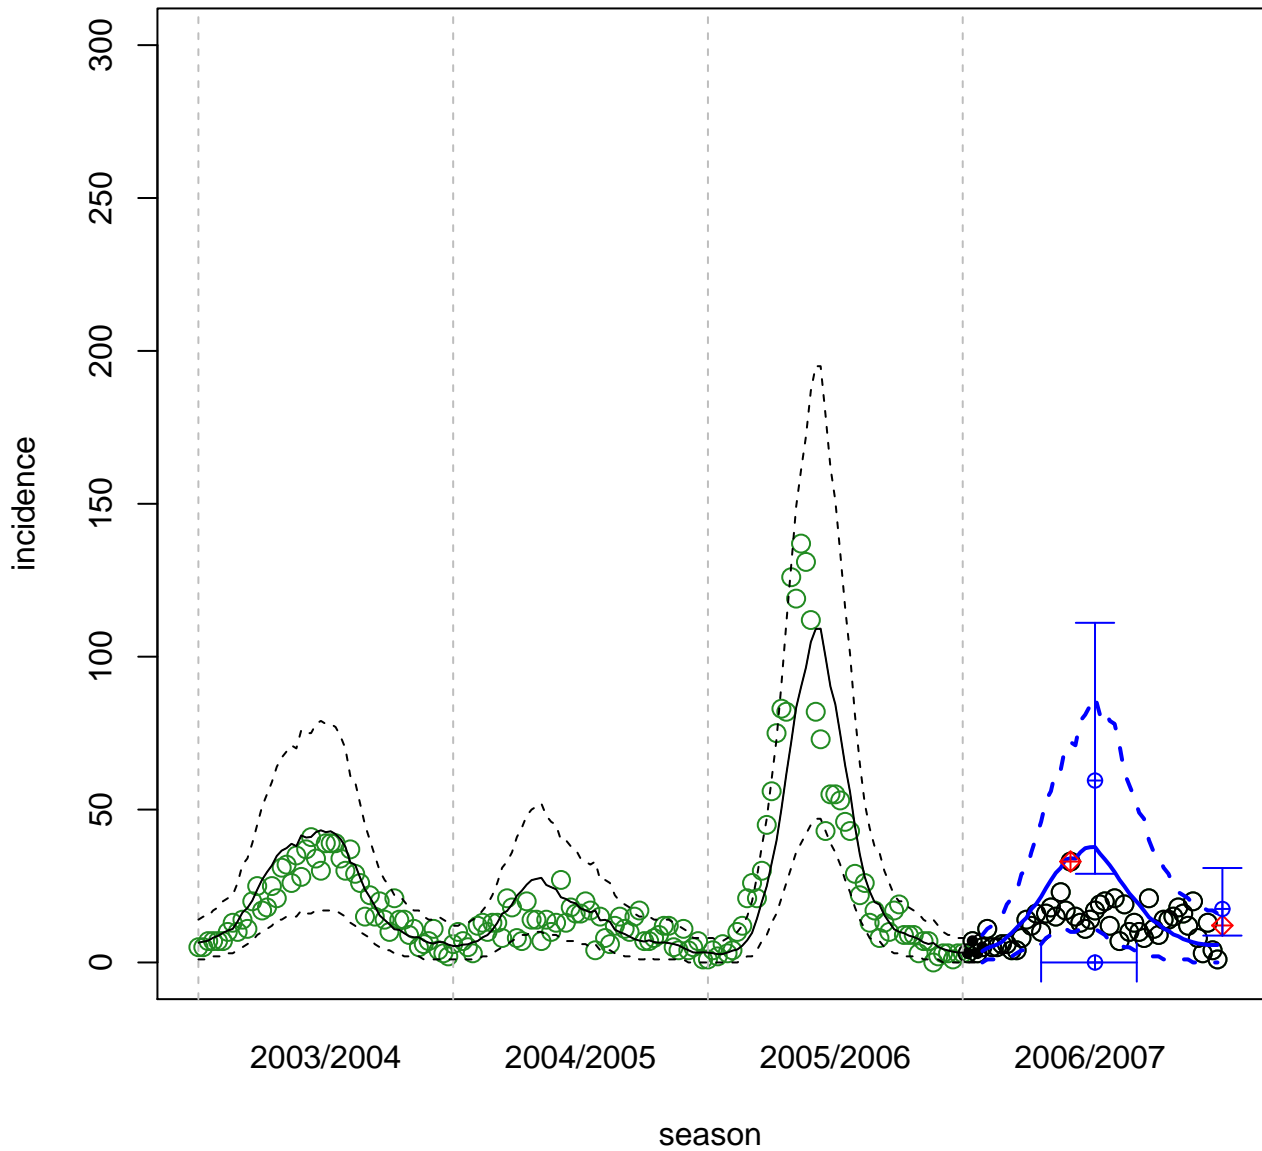

# sanjuan incidence

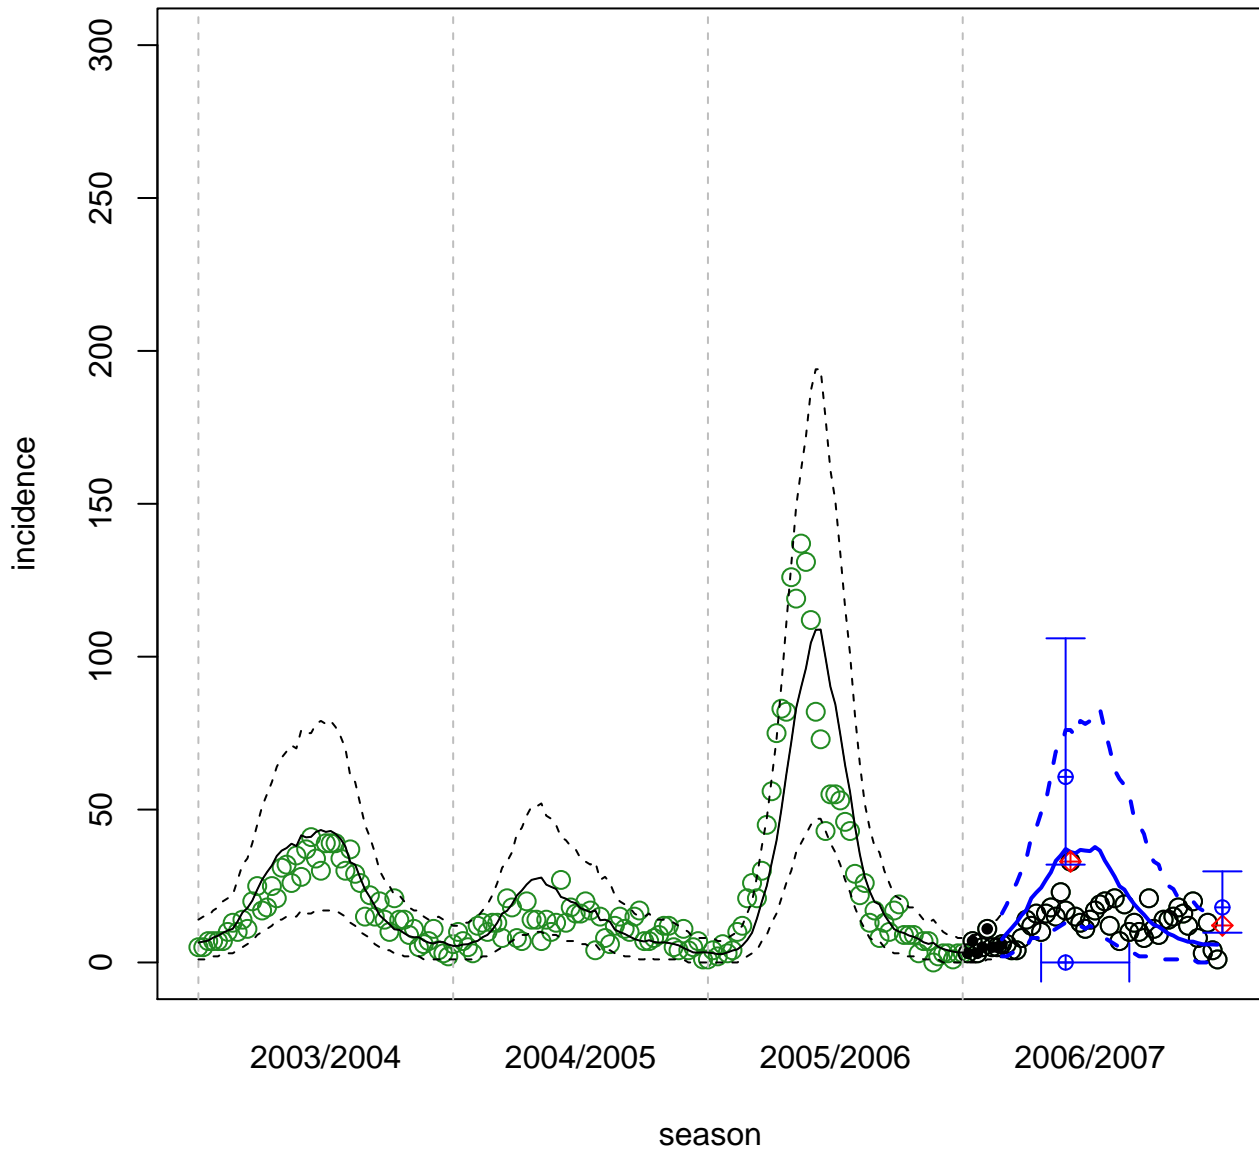



# sanjuan incidence

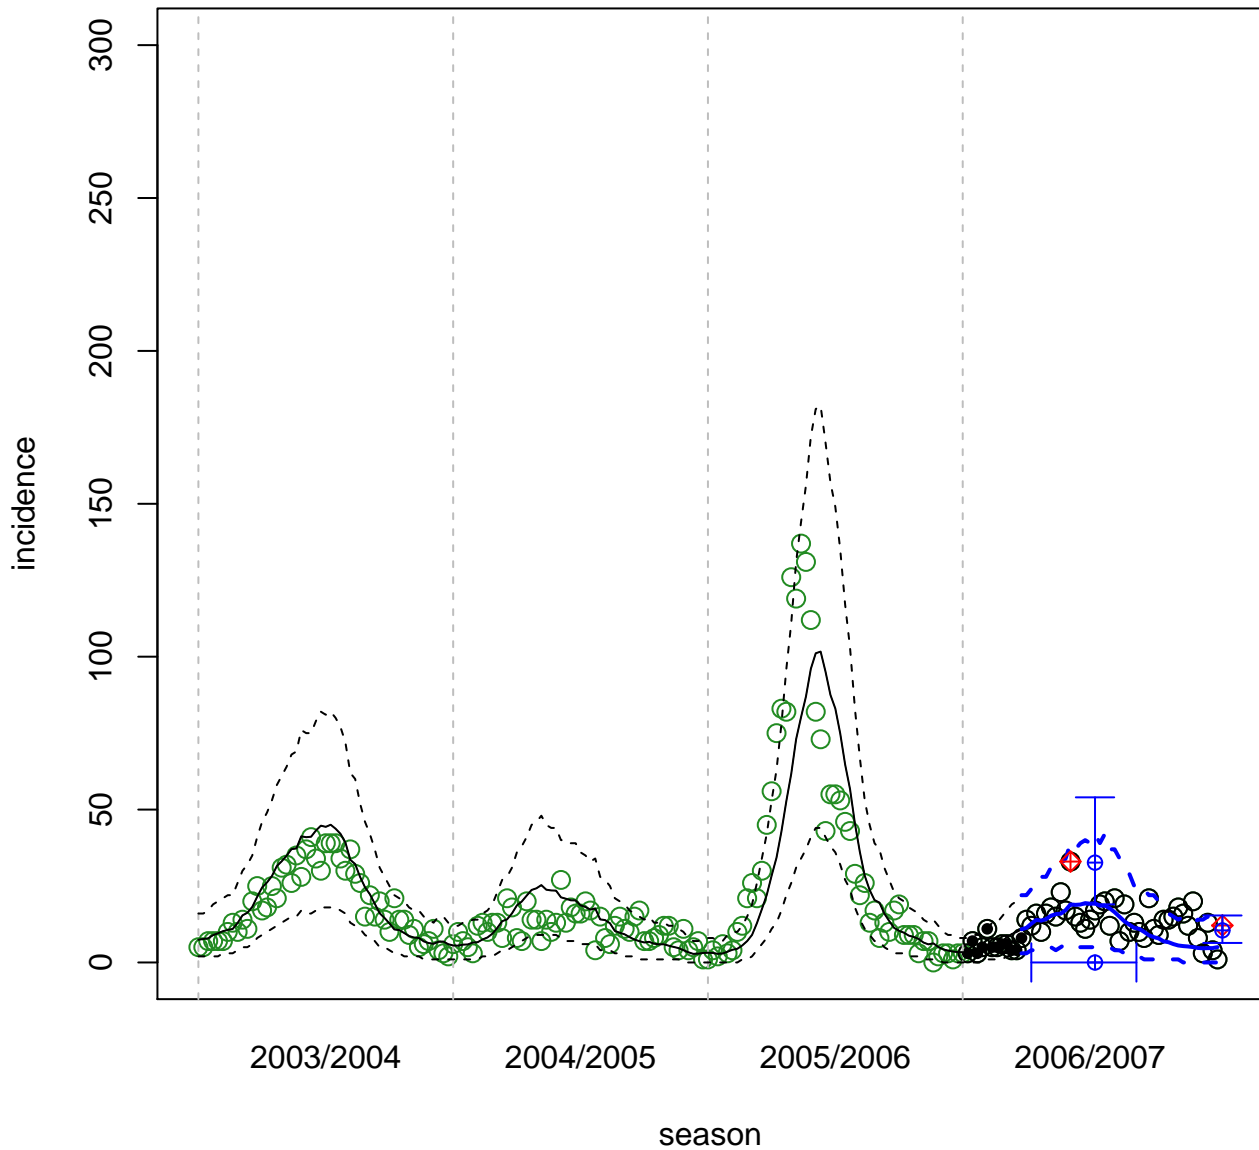

# sanjuan incidence

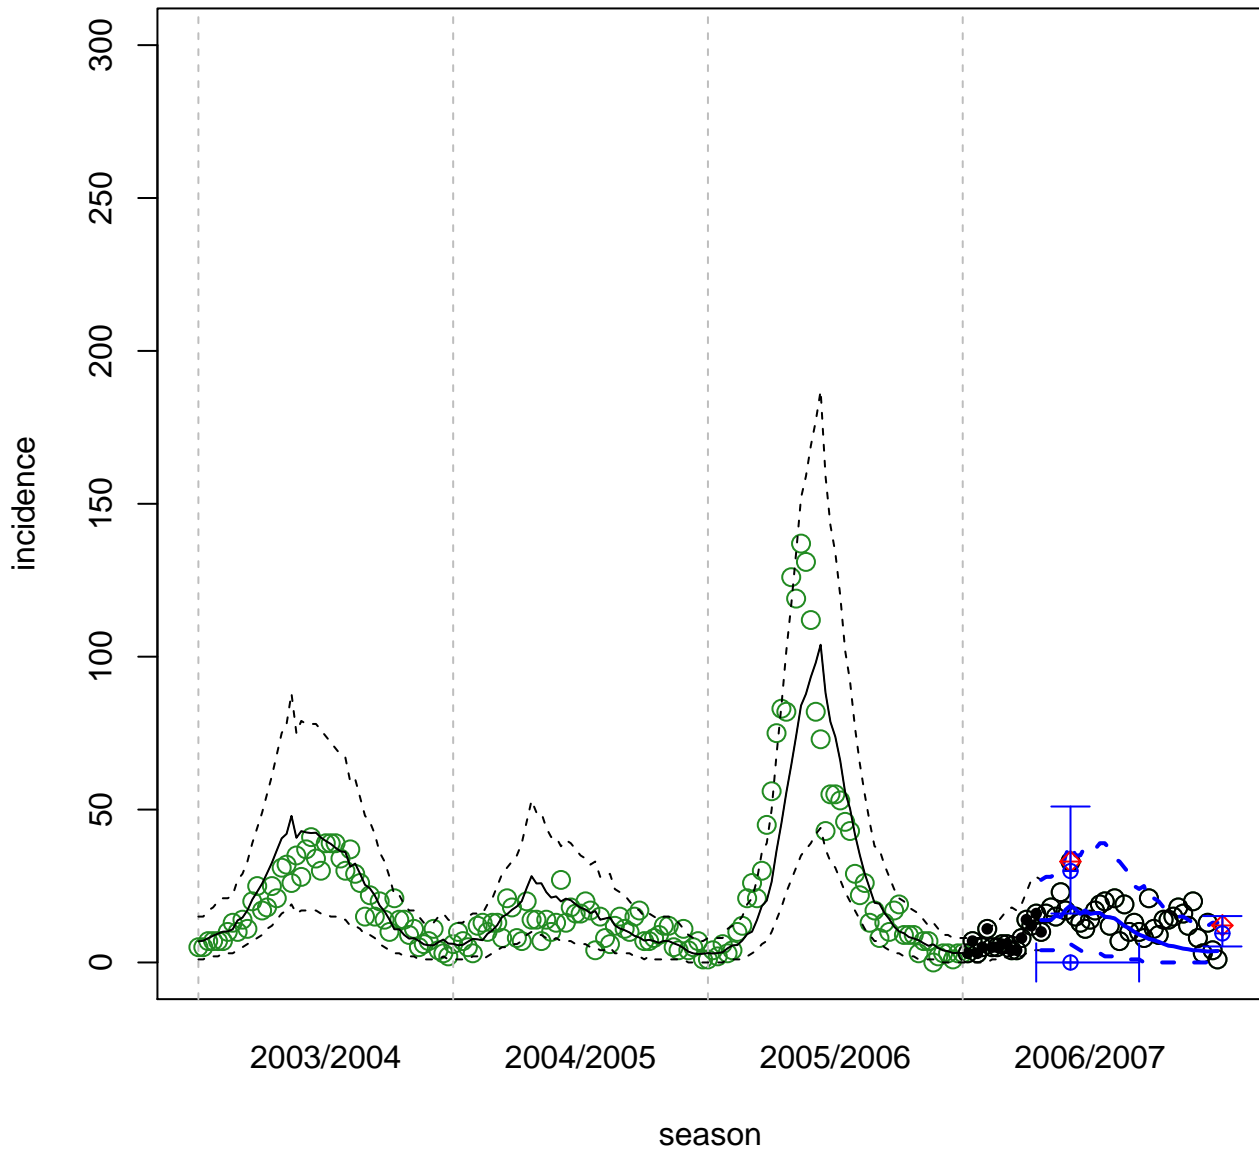

# sanjuan incidence

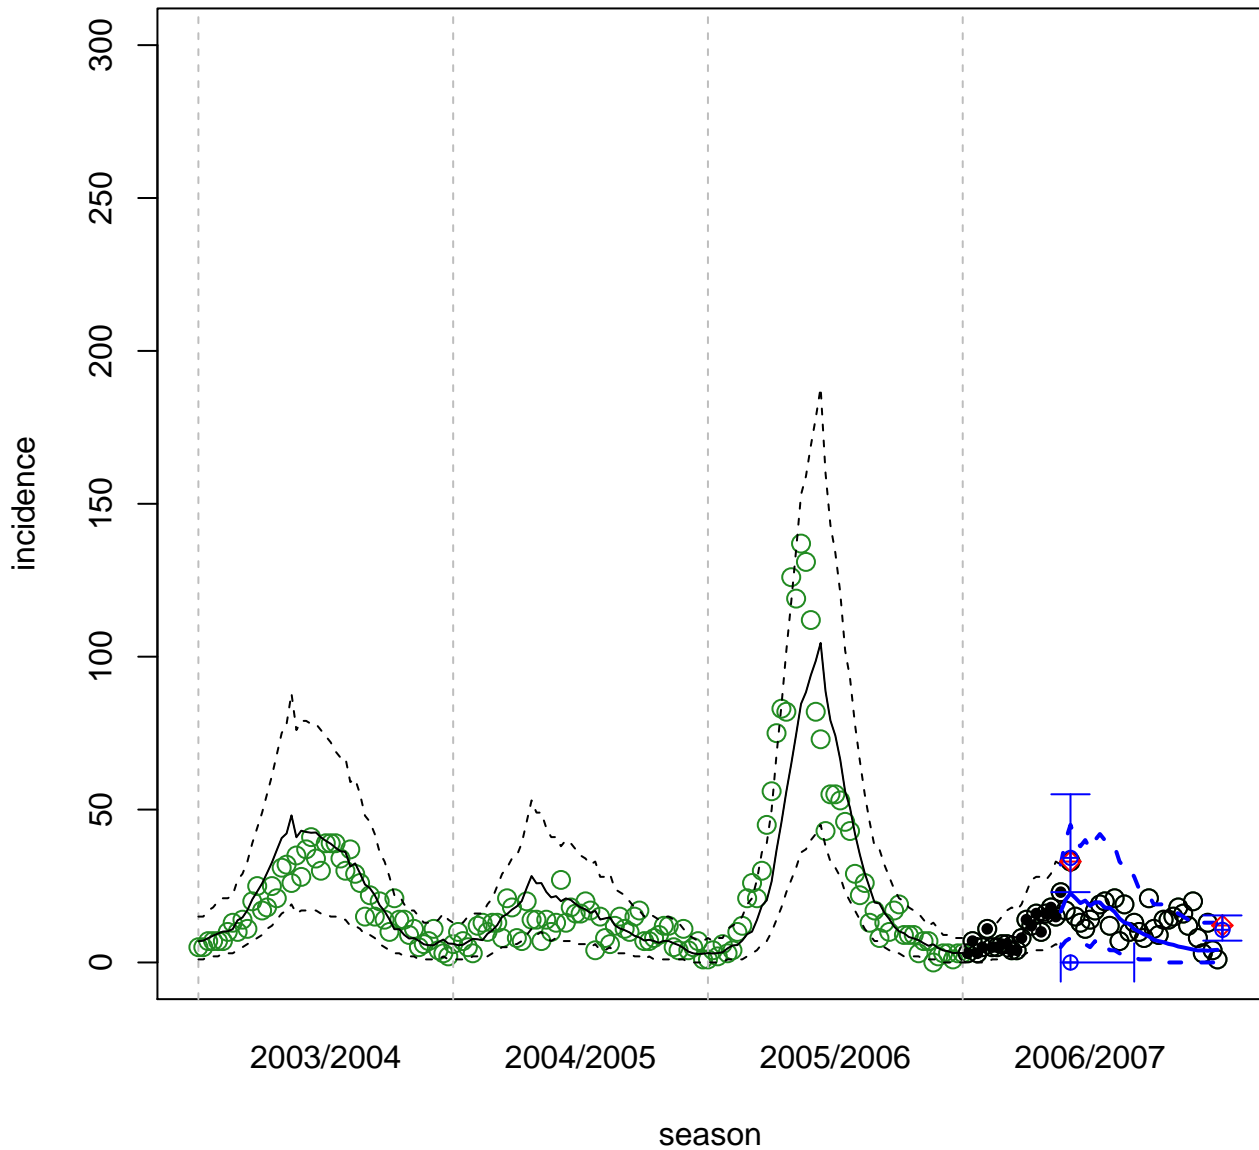

# sanjuan incidence

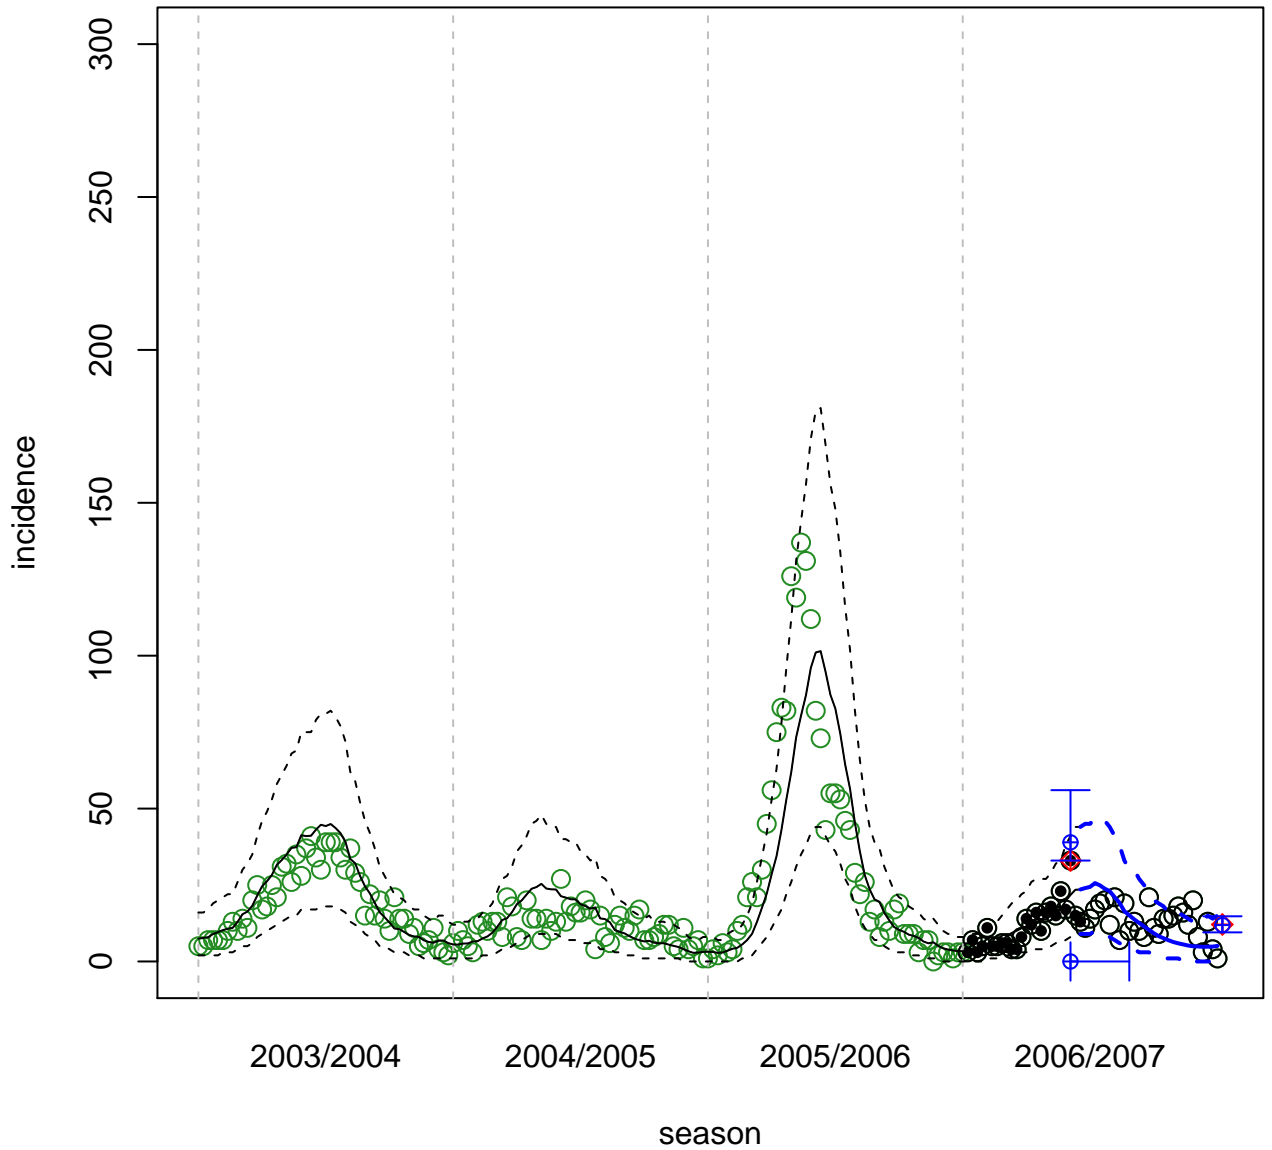



# sanjuan incidence

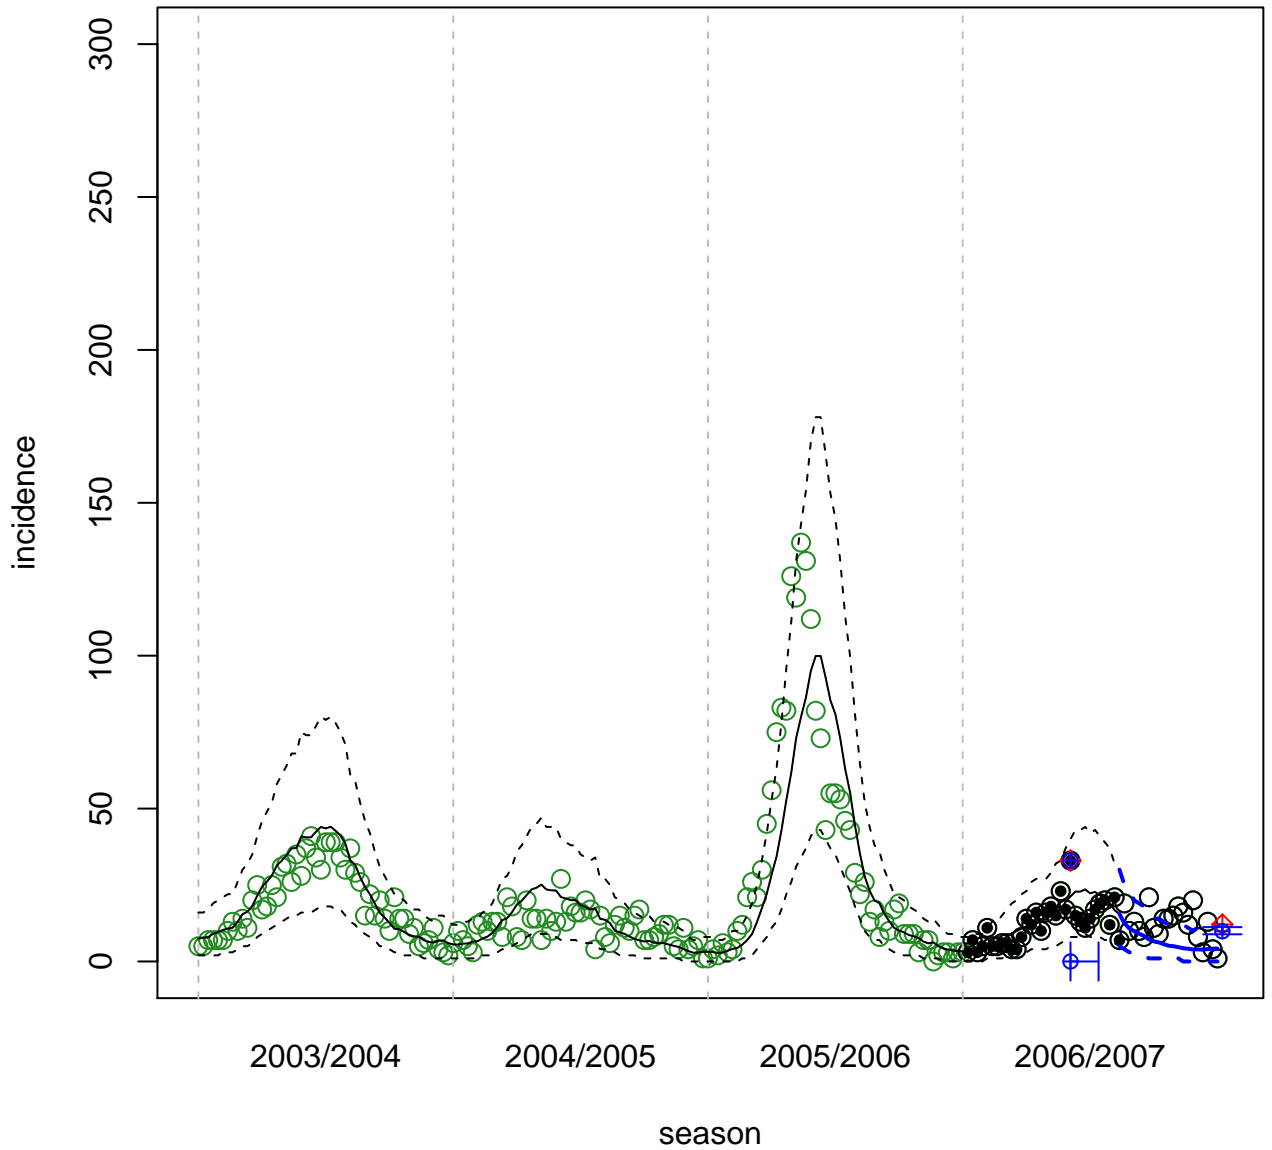

# sanjuan incidence

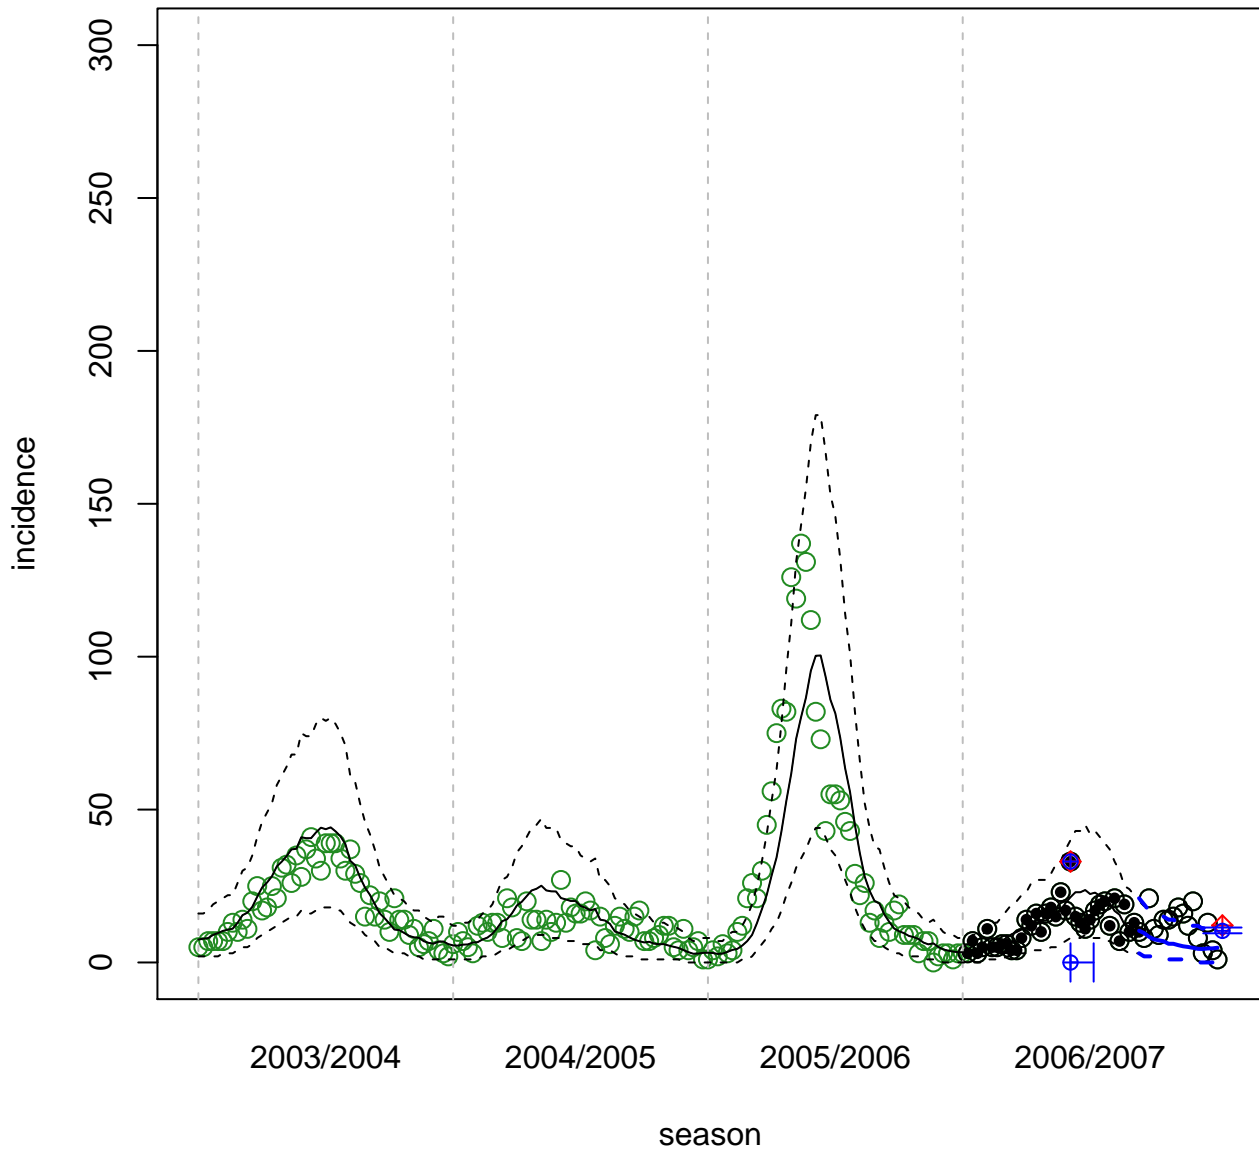

# sanjuan incidence

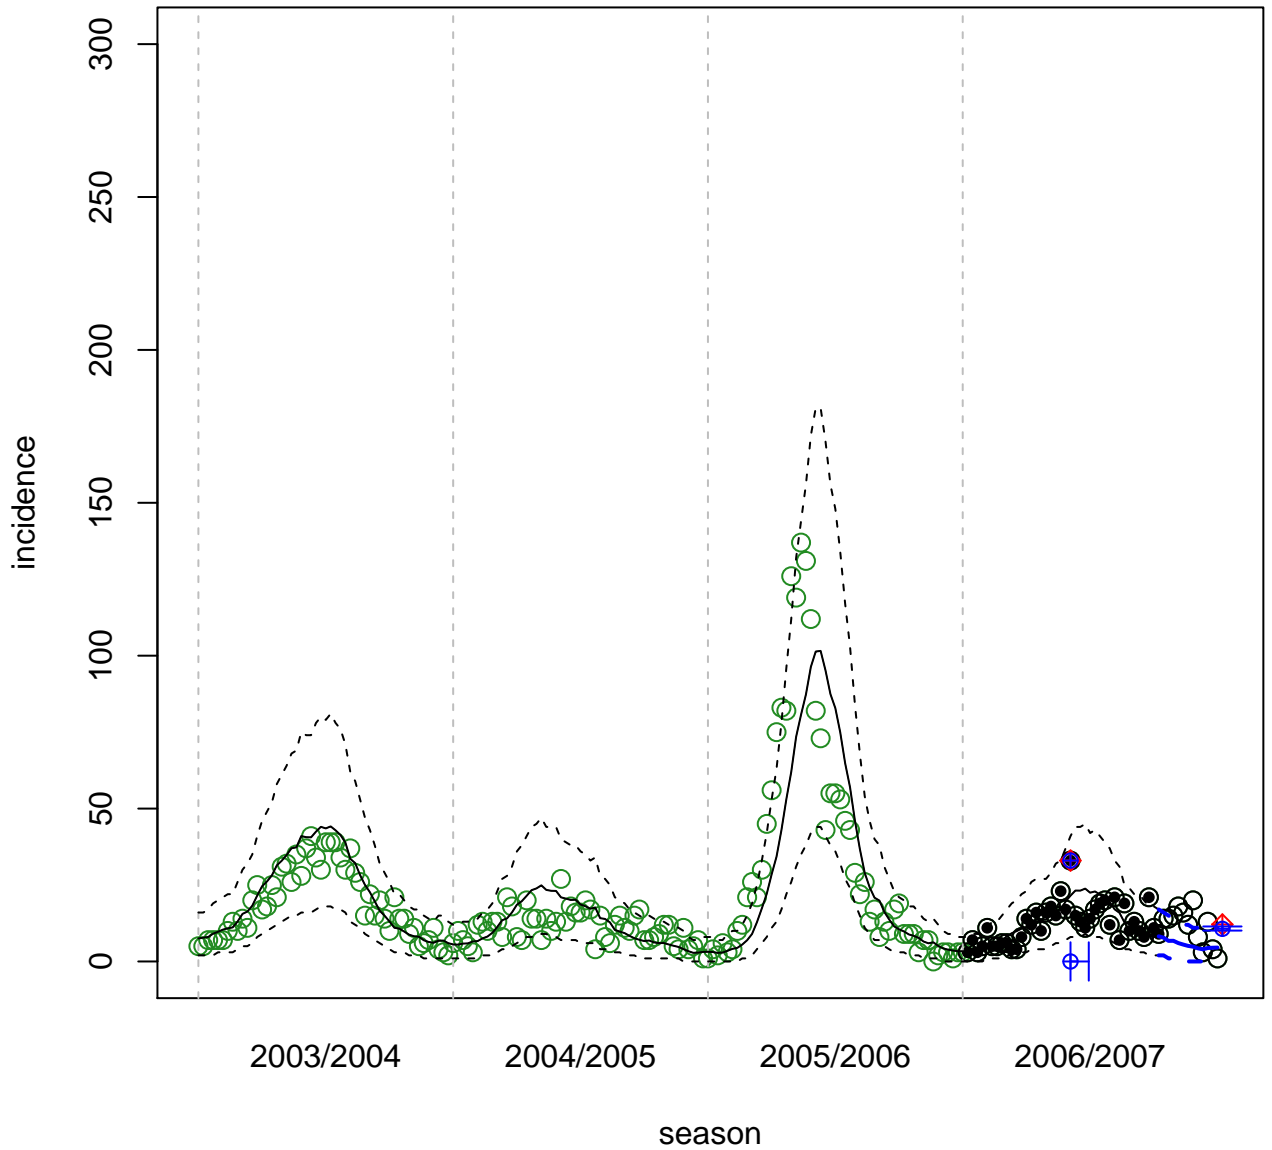



# sanjuan incidence

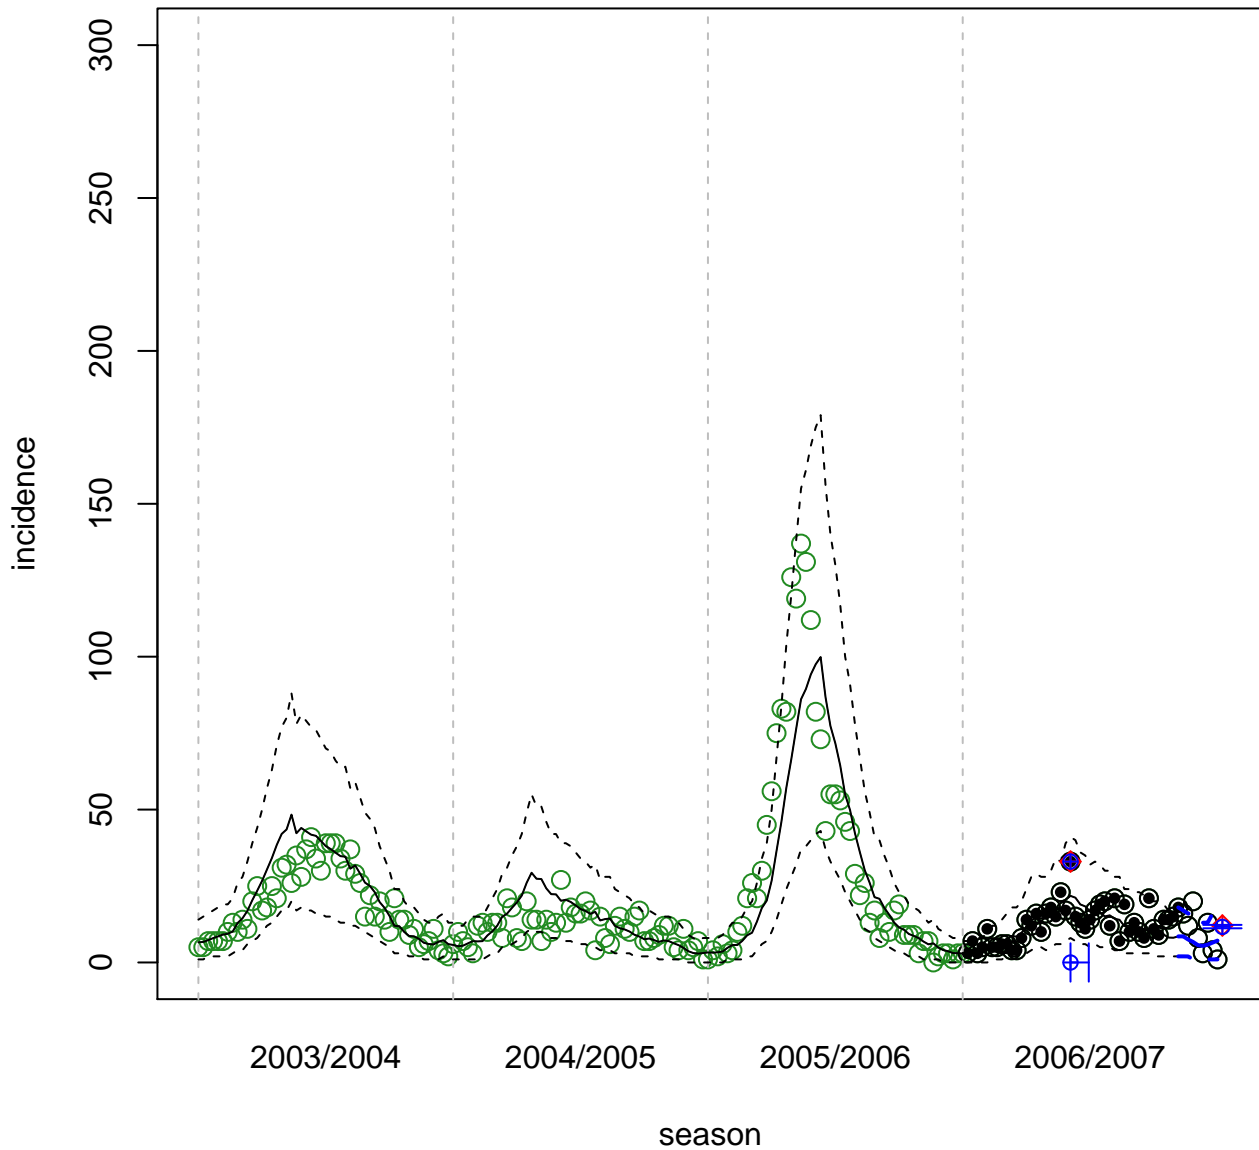

# sanjuan incidence

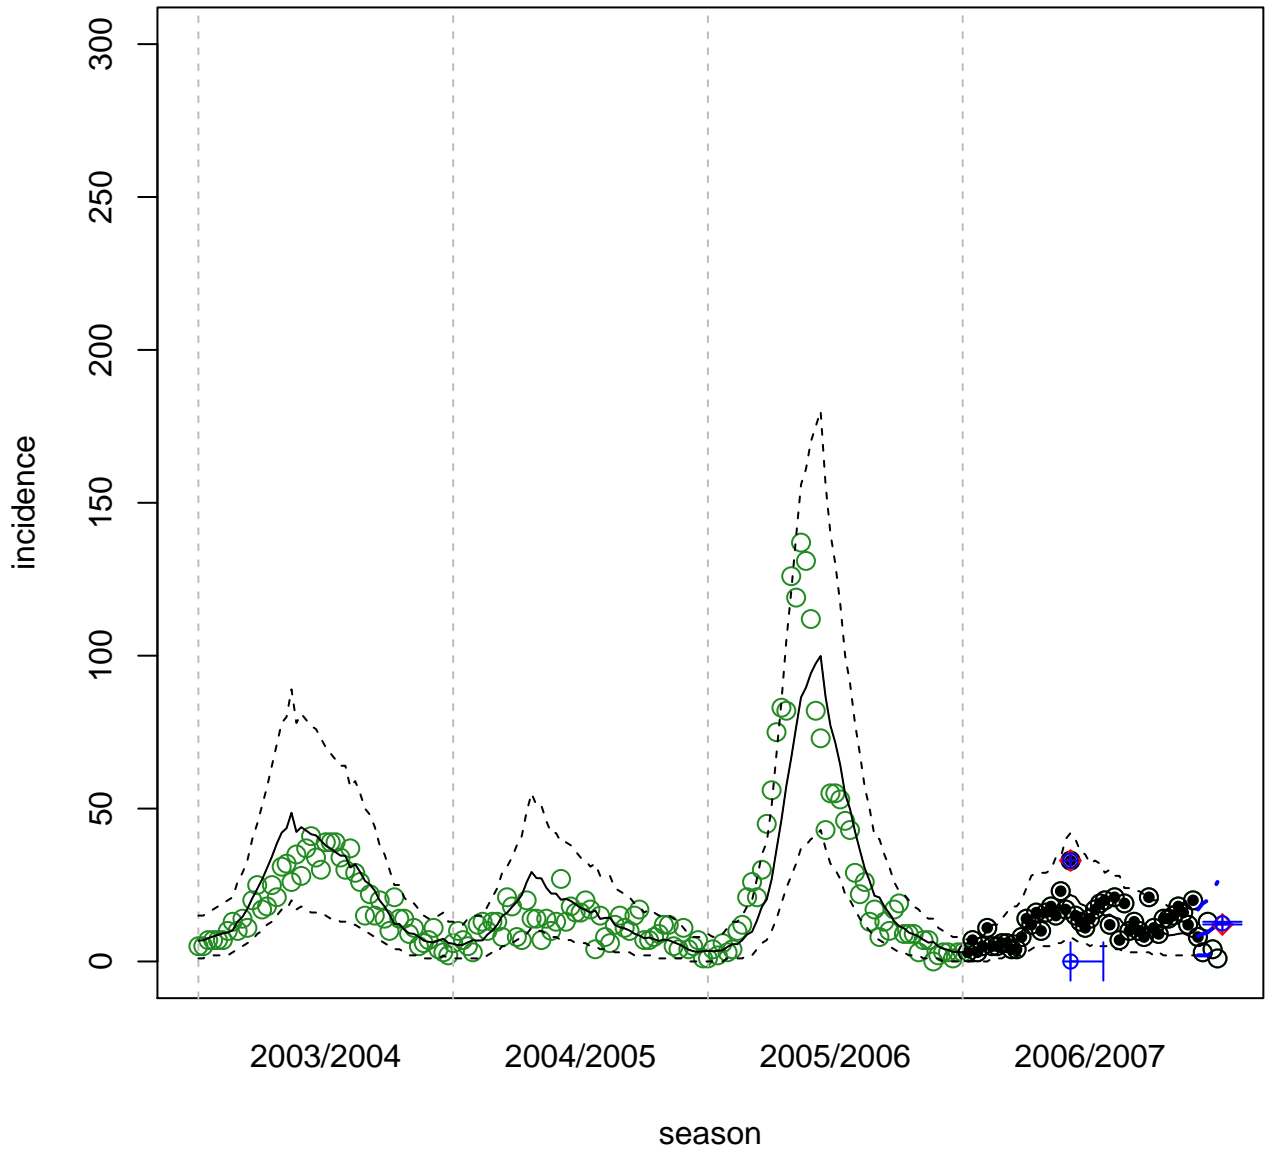

# sanjuan incidence

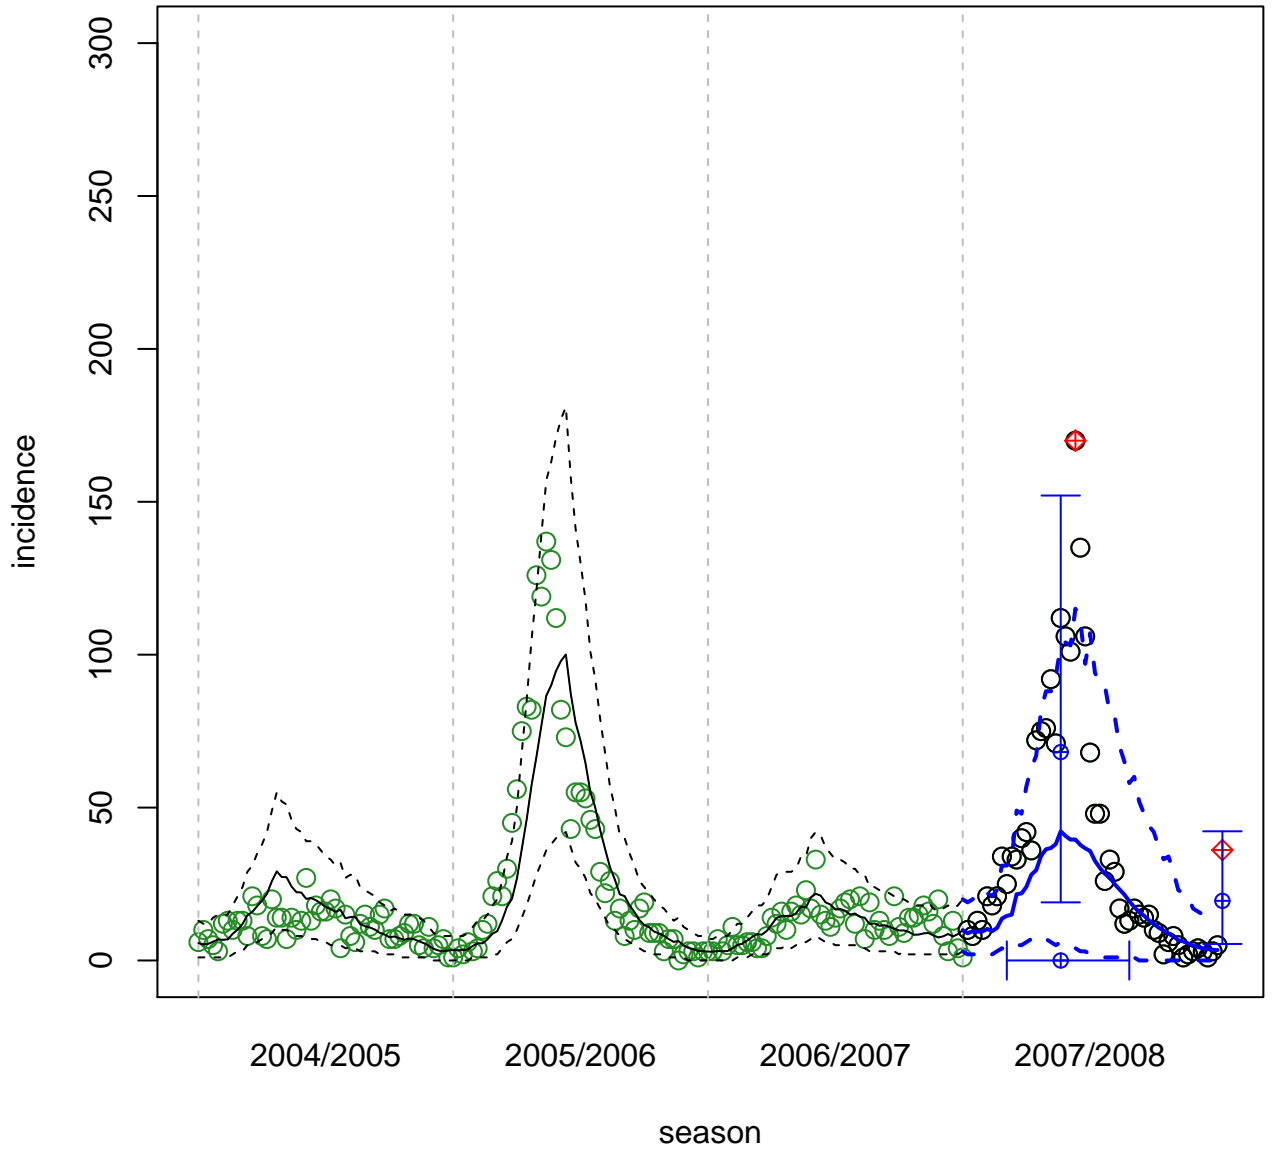

# sanjuan incidence

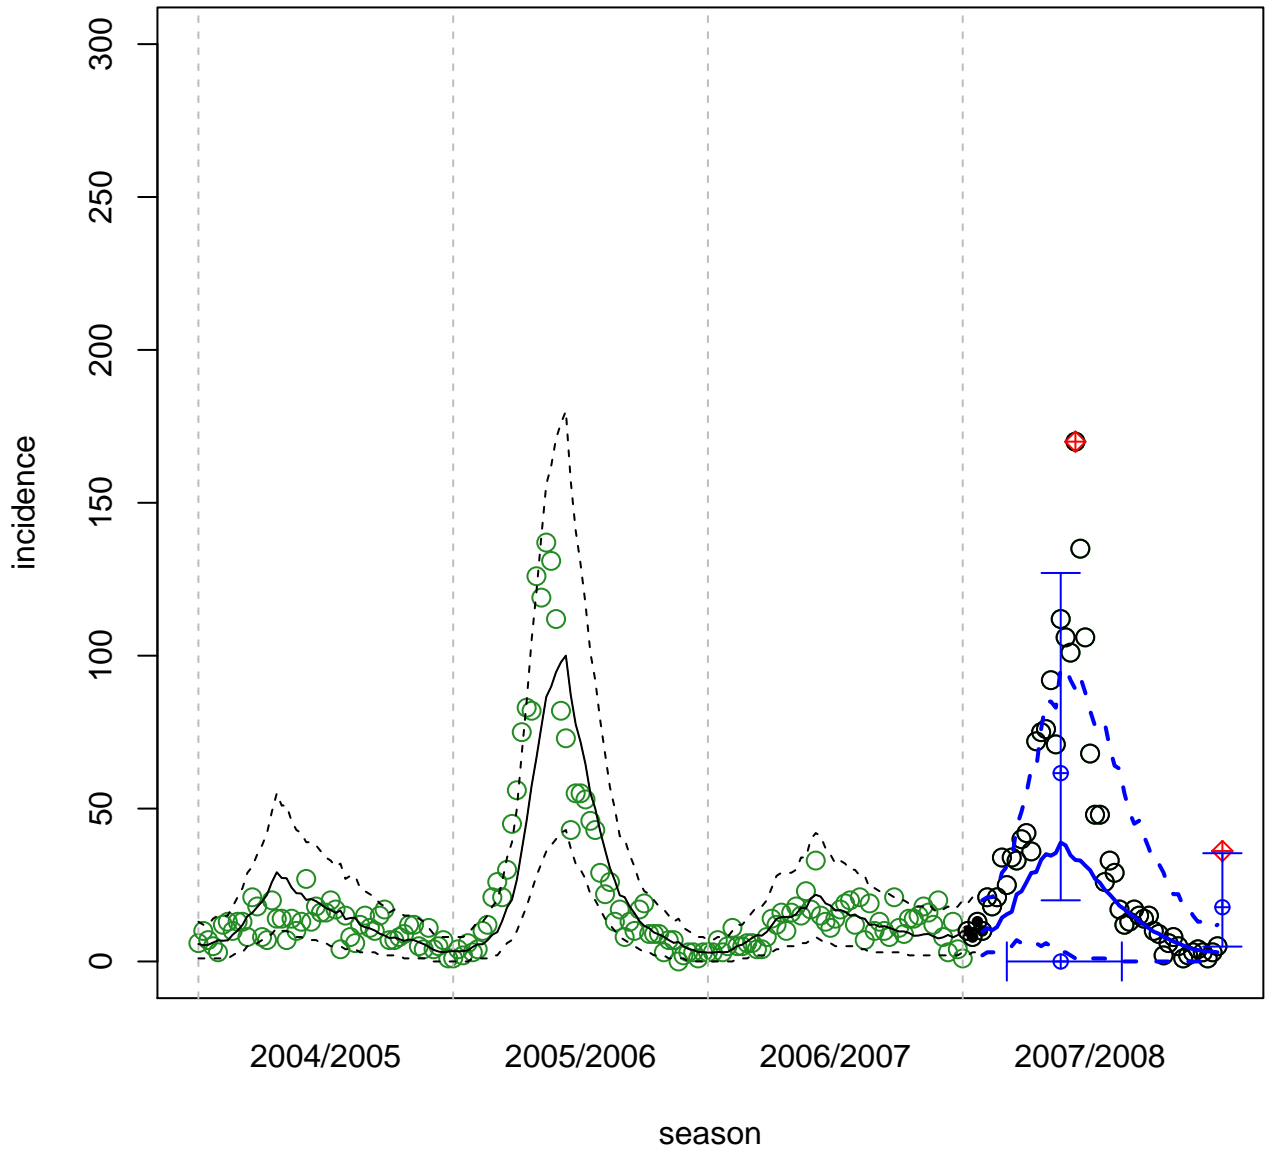

# sanjuan incidence

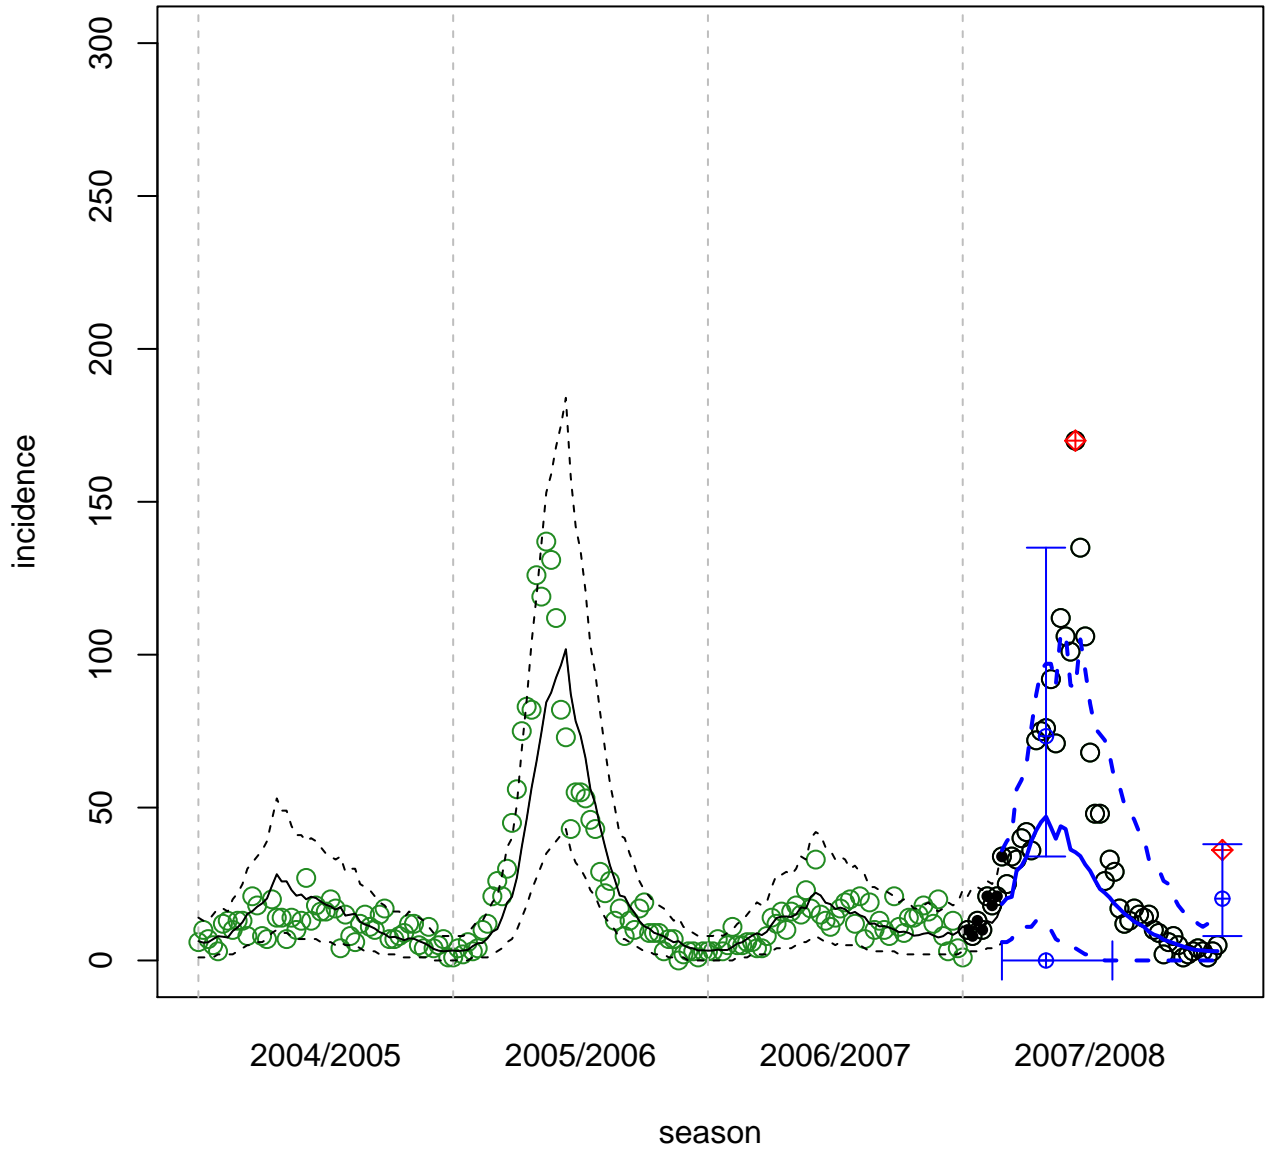

# sanjuan incidence

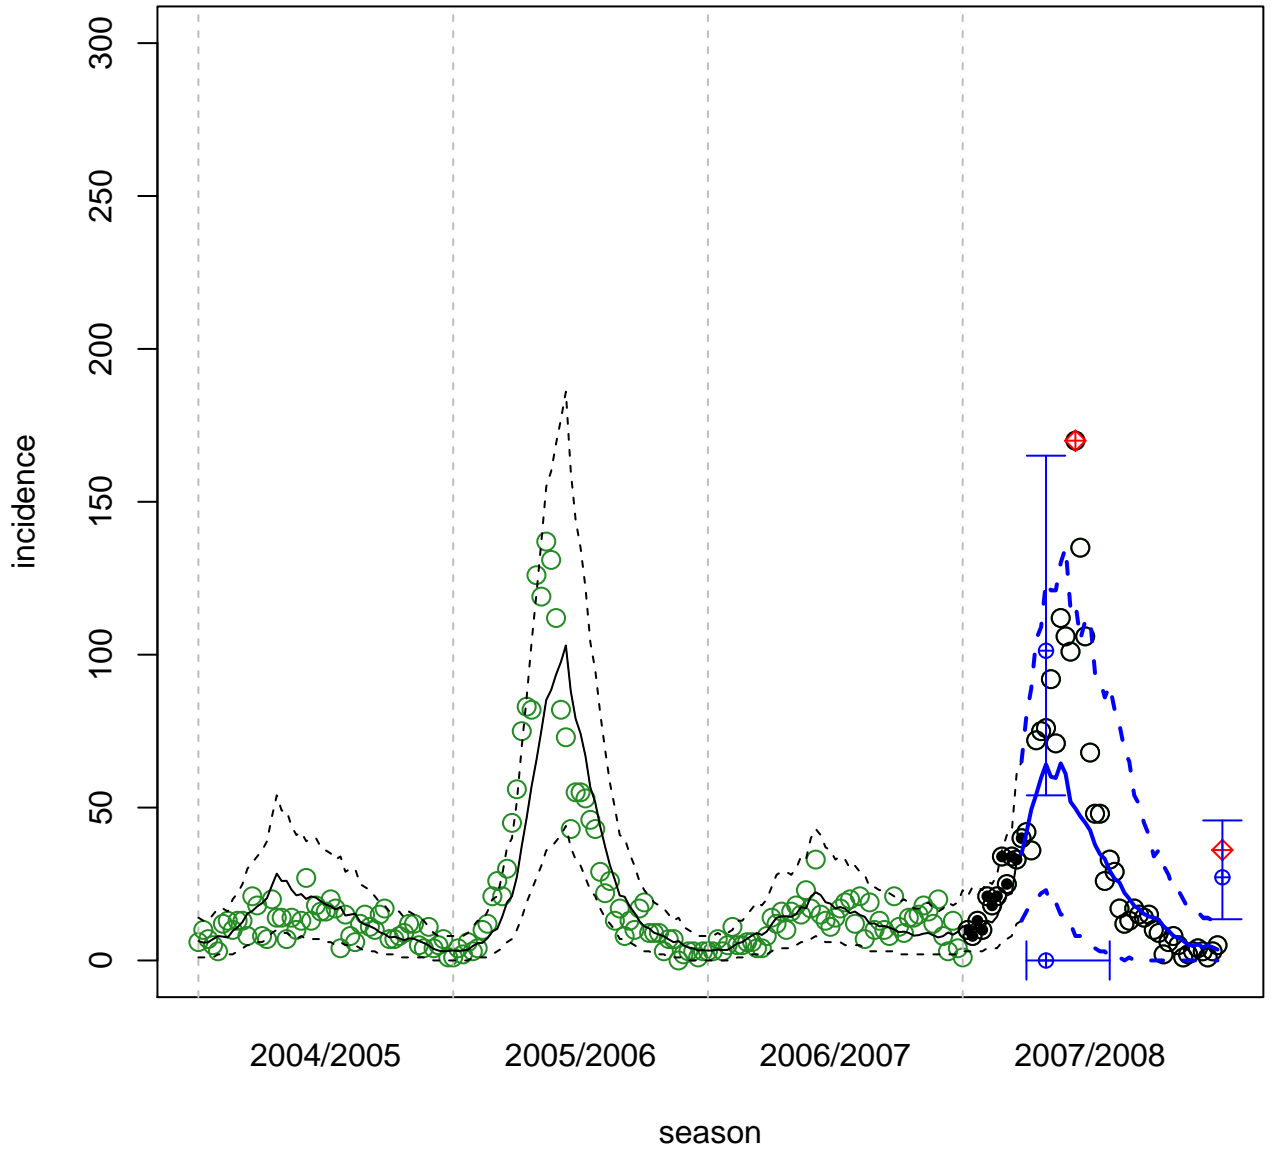

# sanjuan incidence

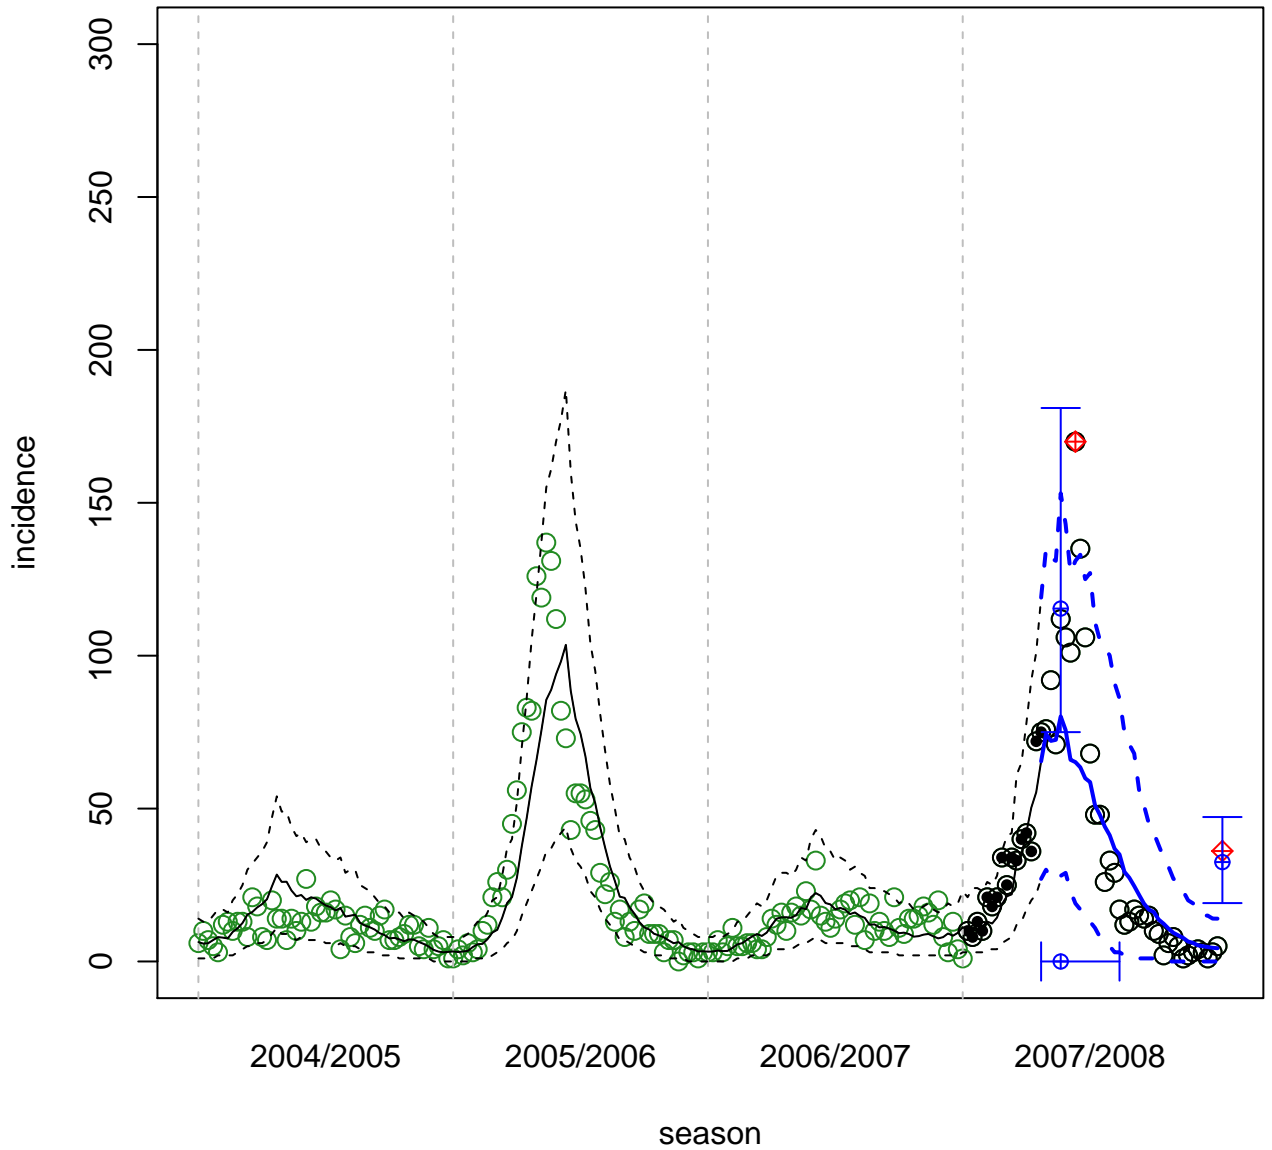

# sanjuan incidence

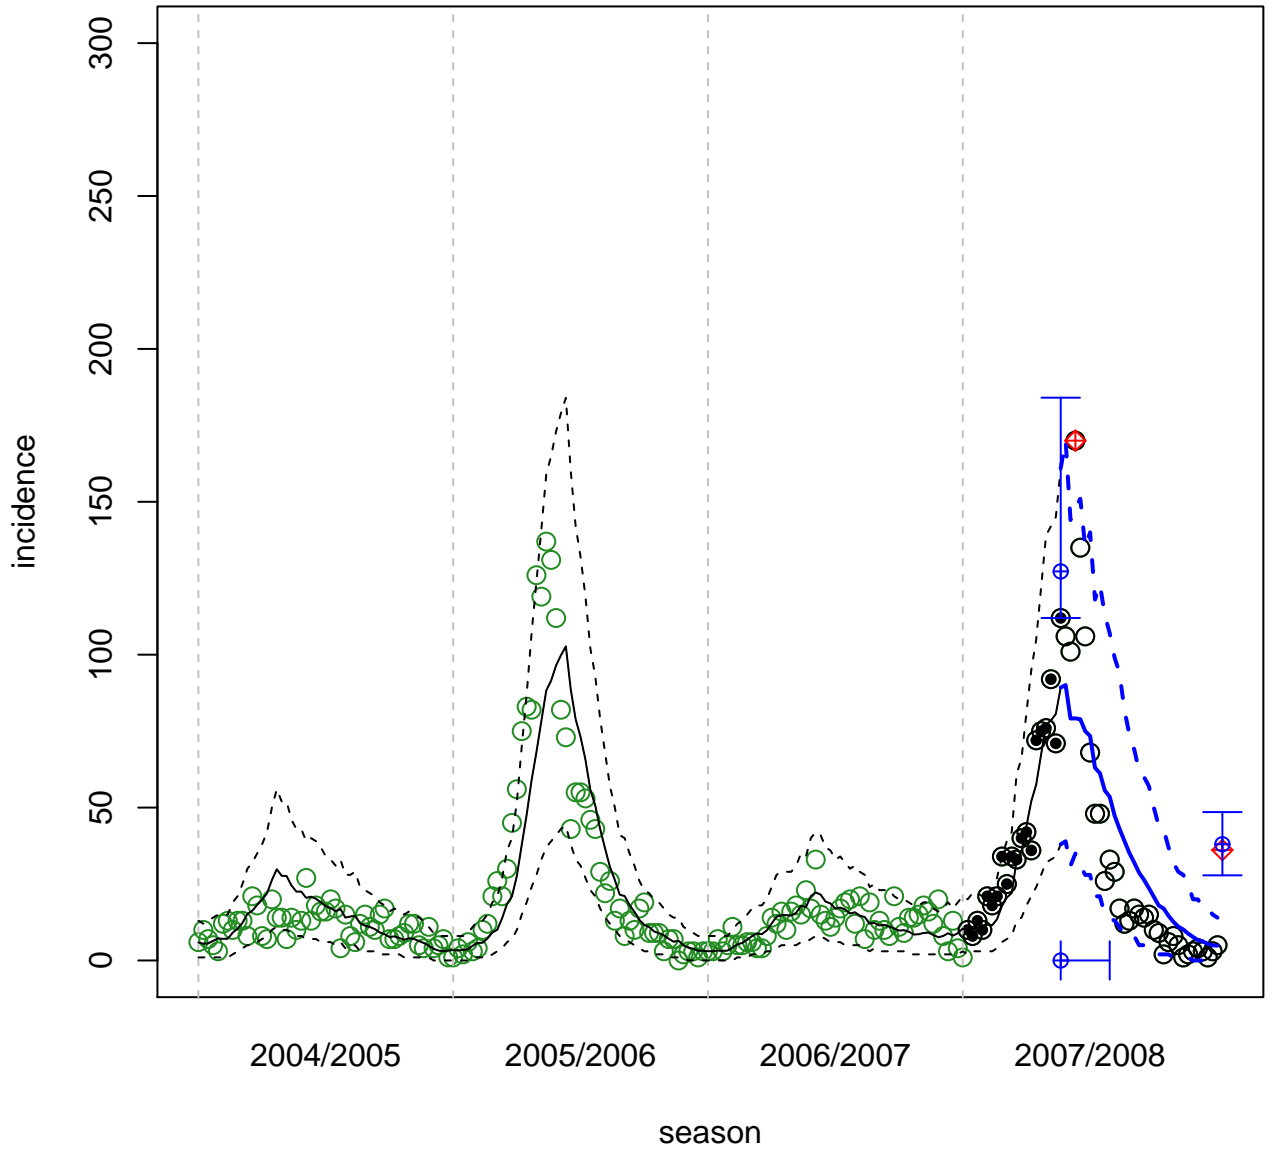



# sanjuan incidence

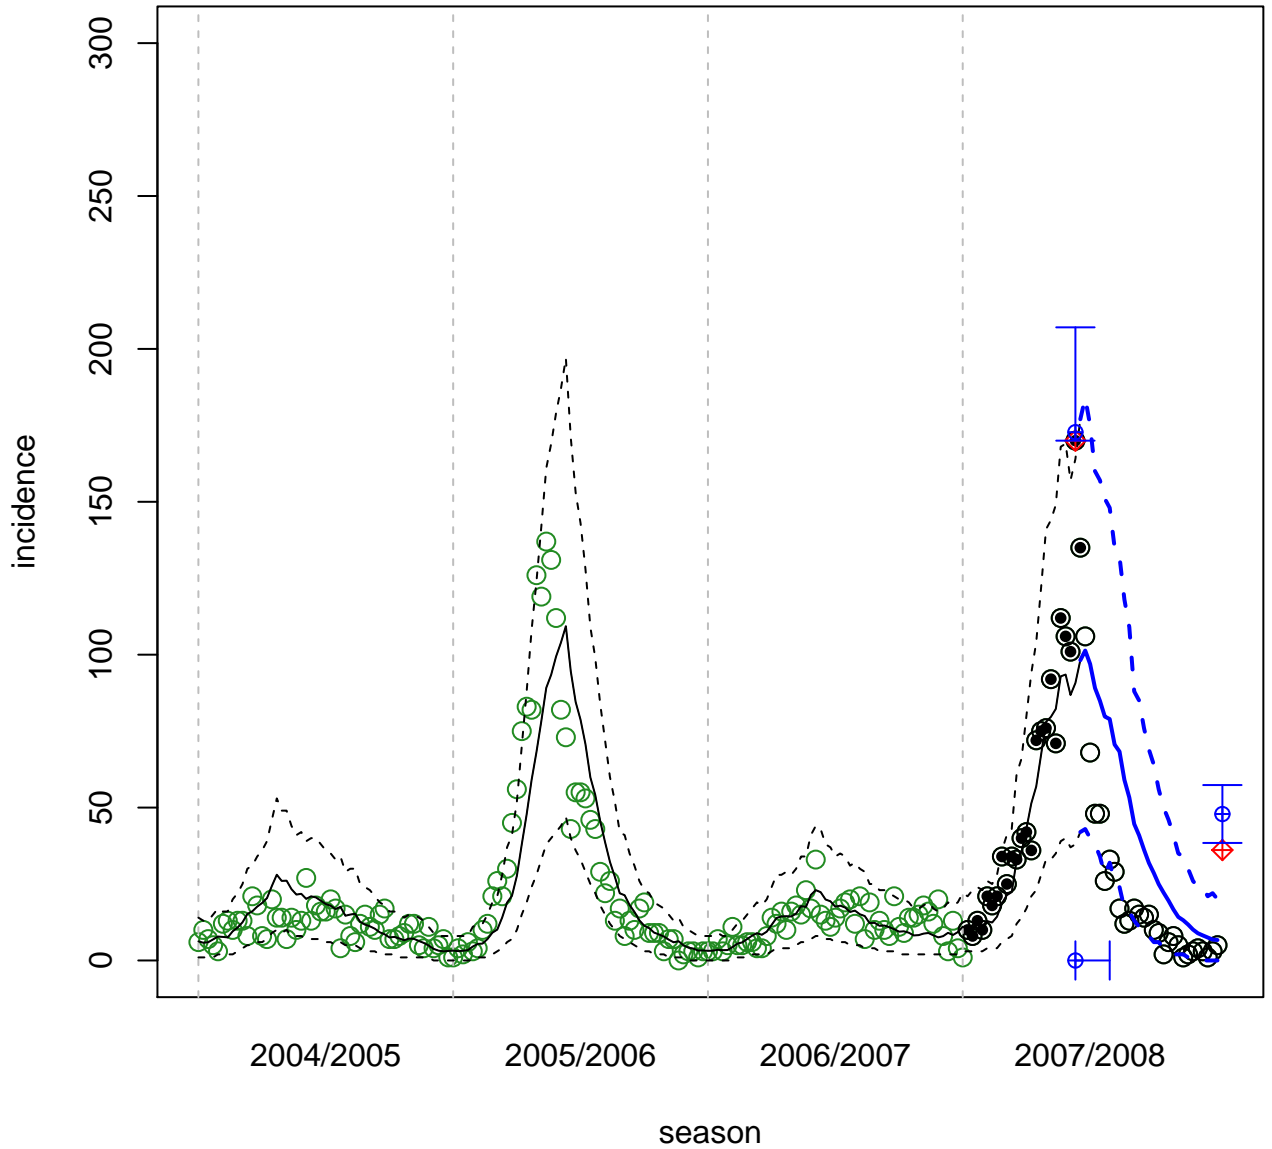

# sanjuan incidence

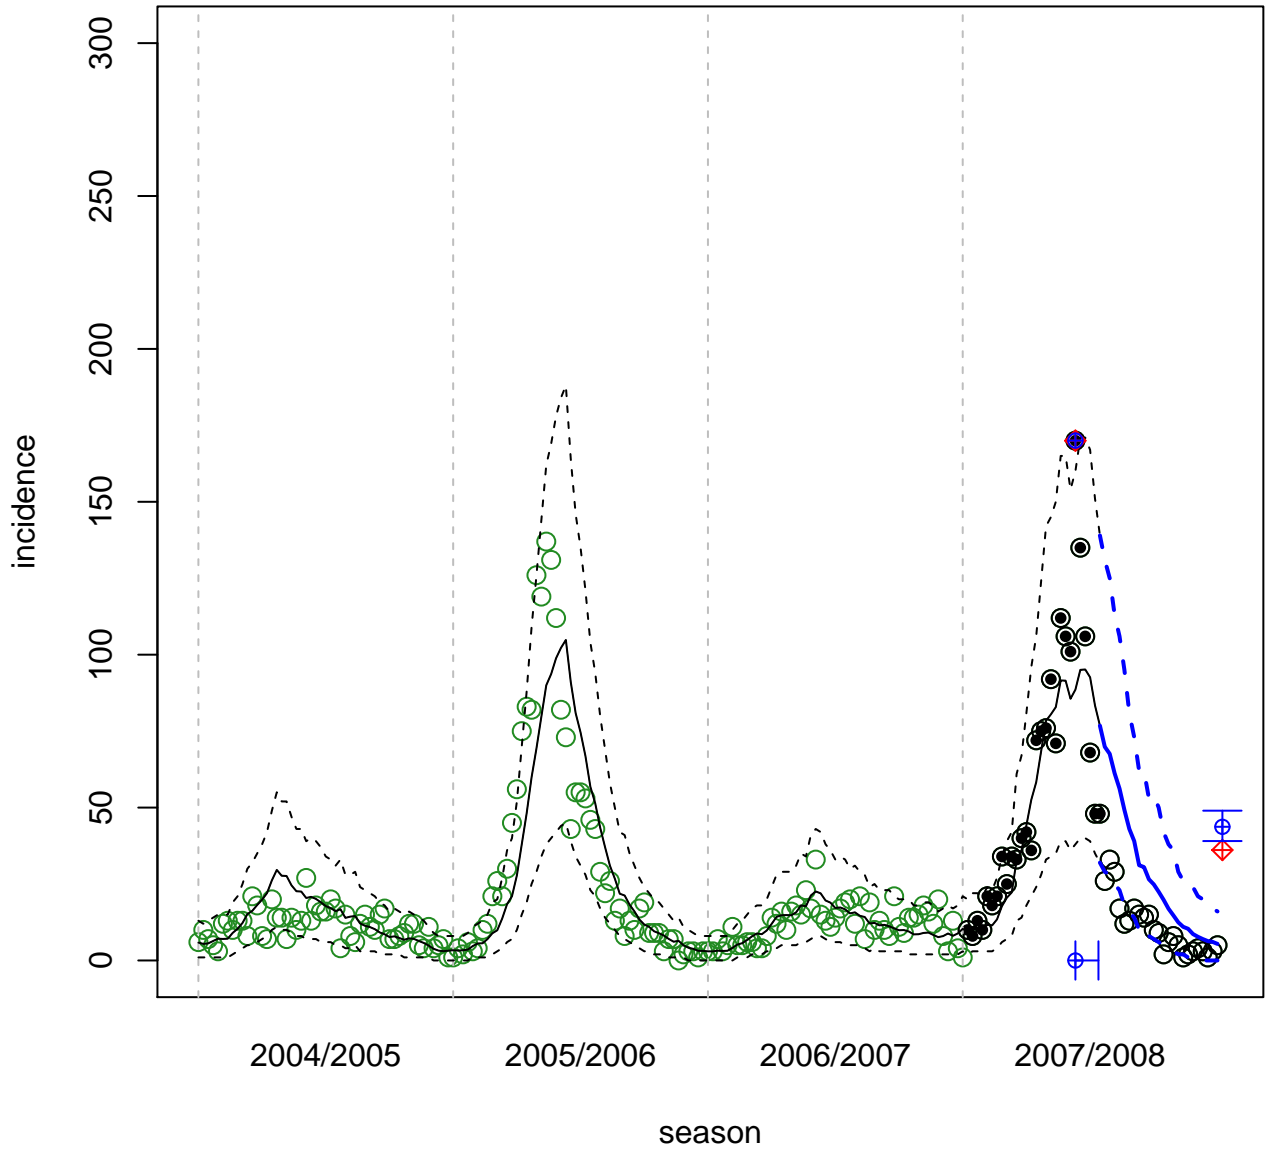

# sanjuan incidence

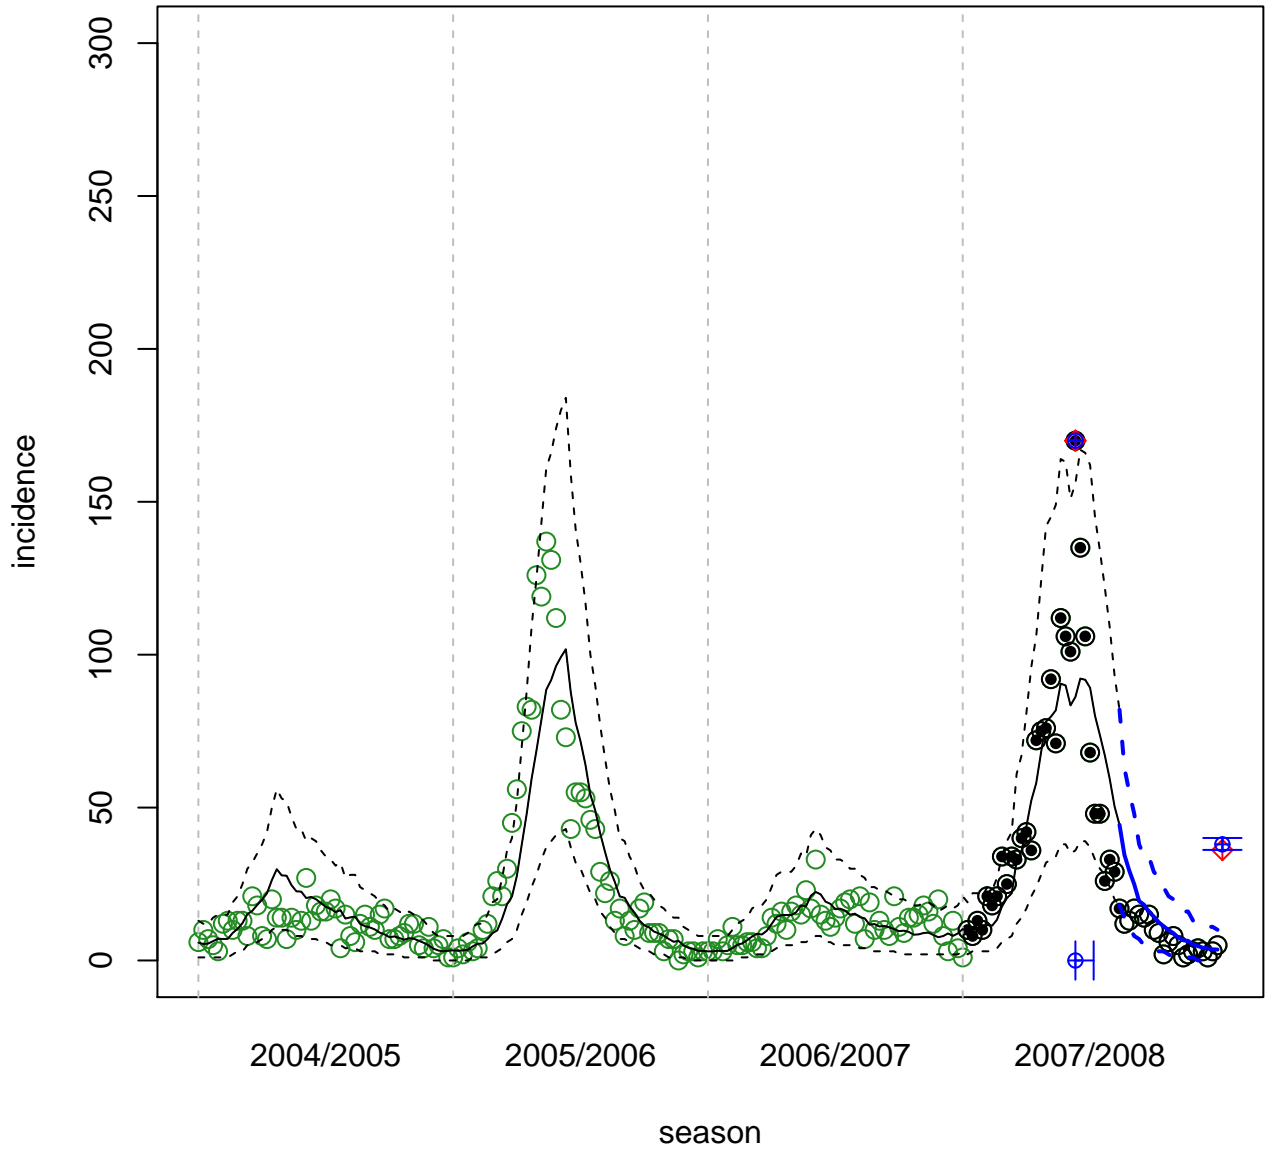

# sanjuan incidence

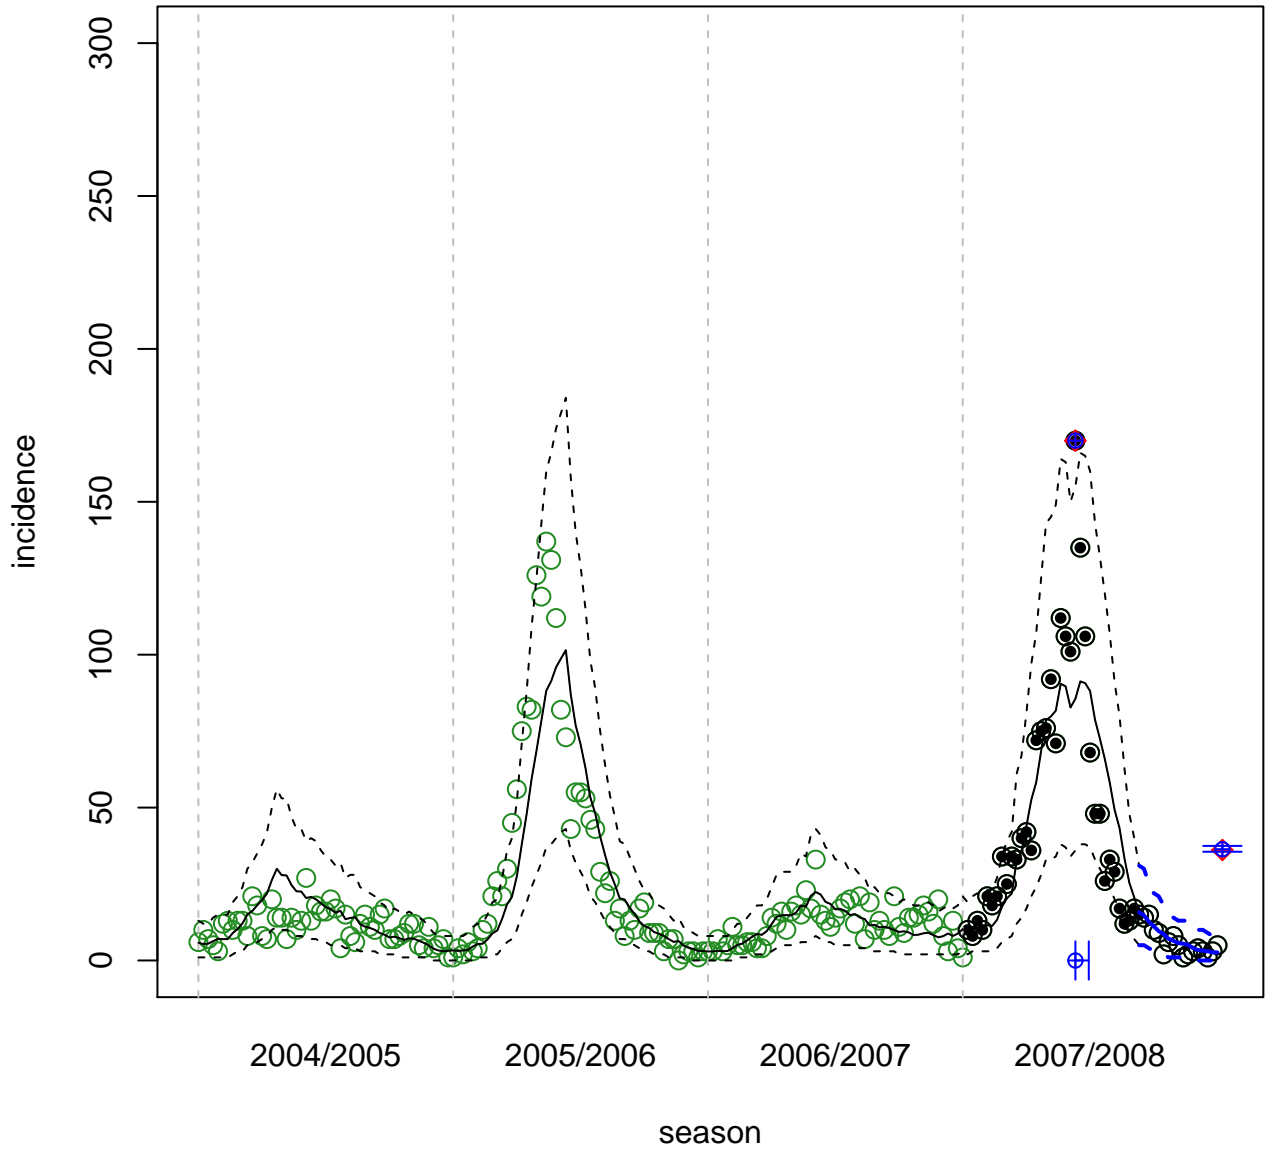

# sanjuan incidence

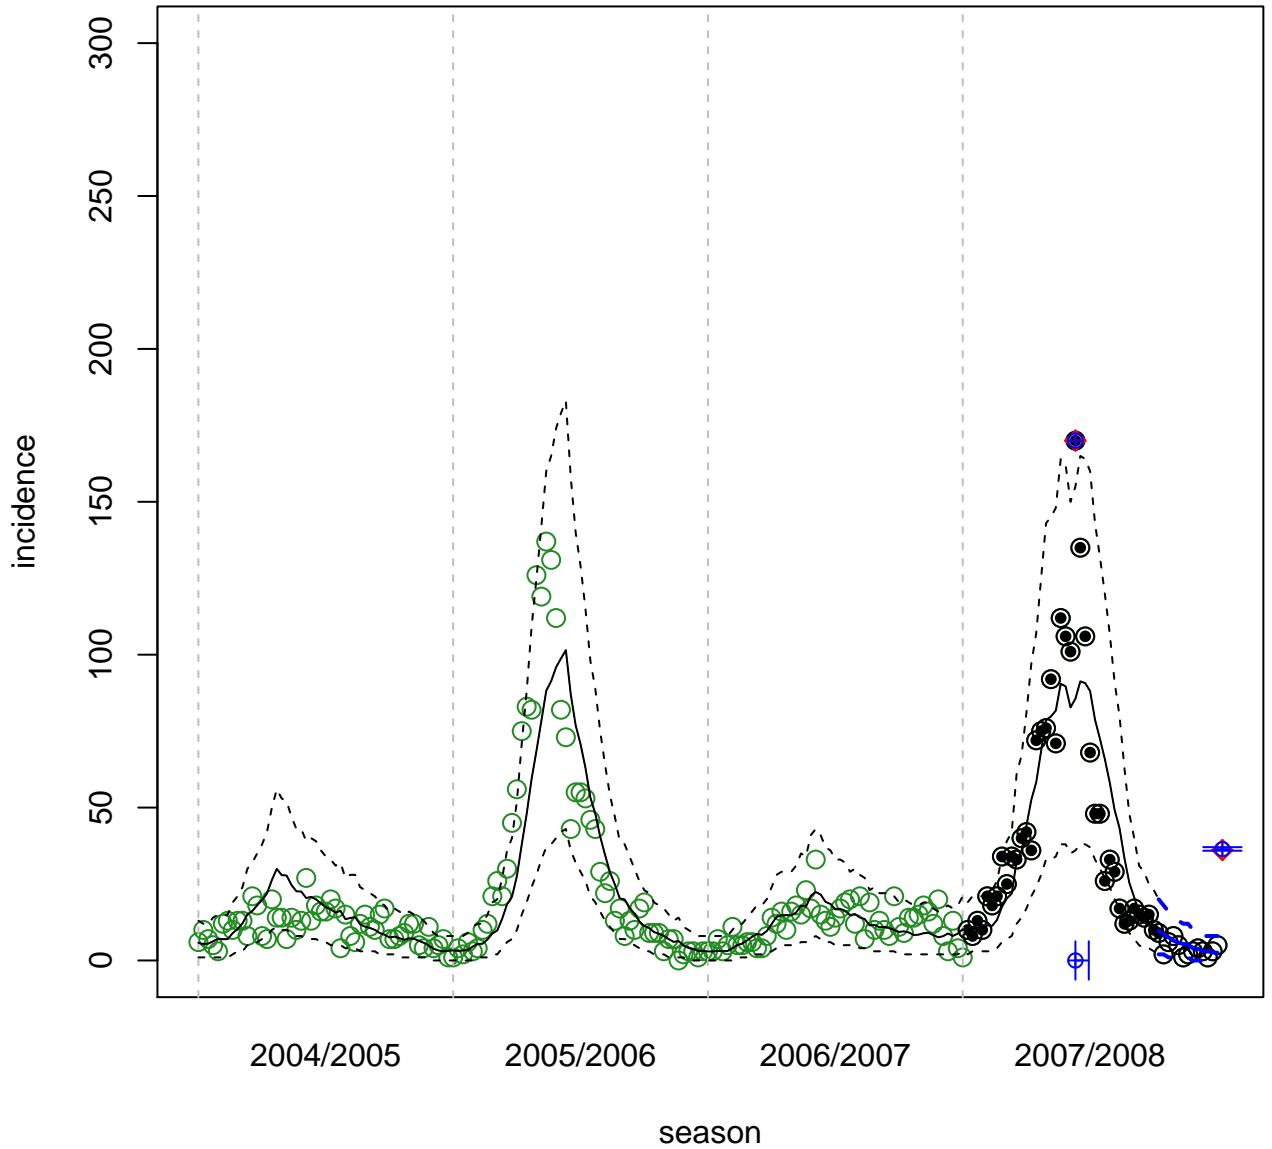

# sanjuan incidence

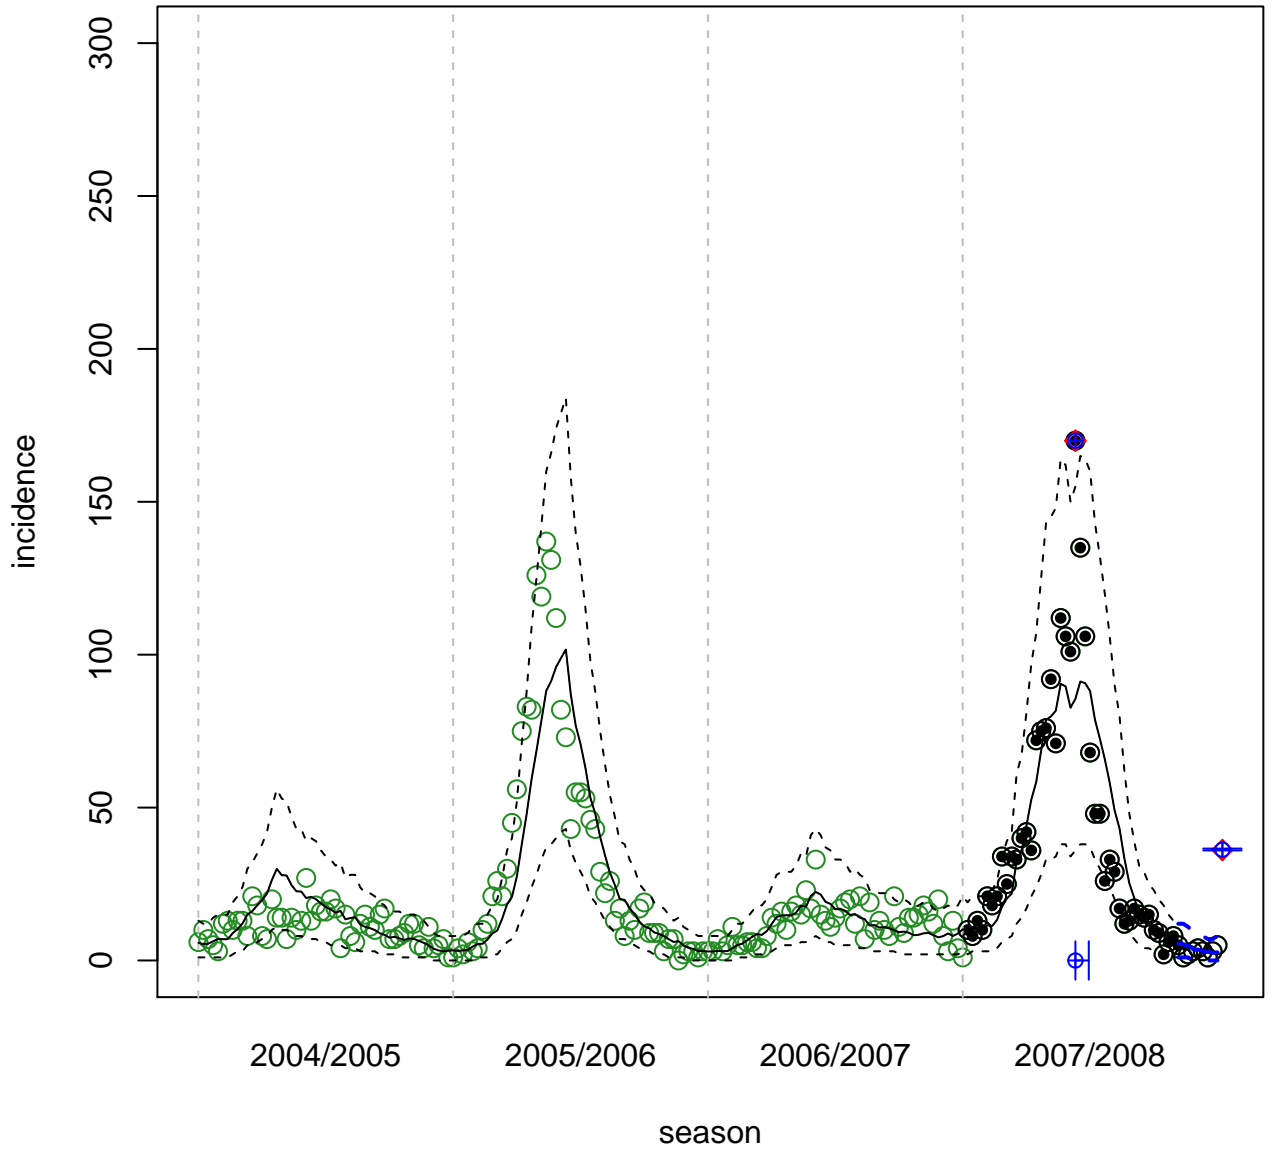

# sanjuan incidence

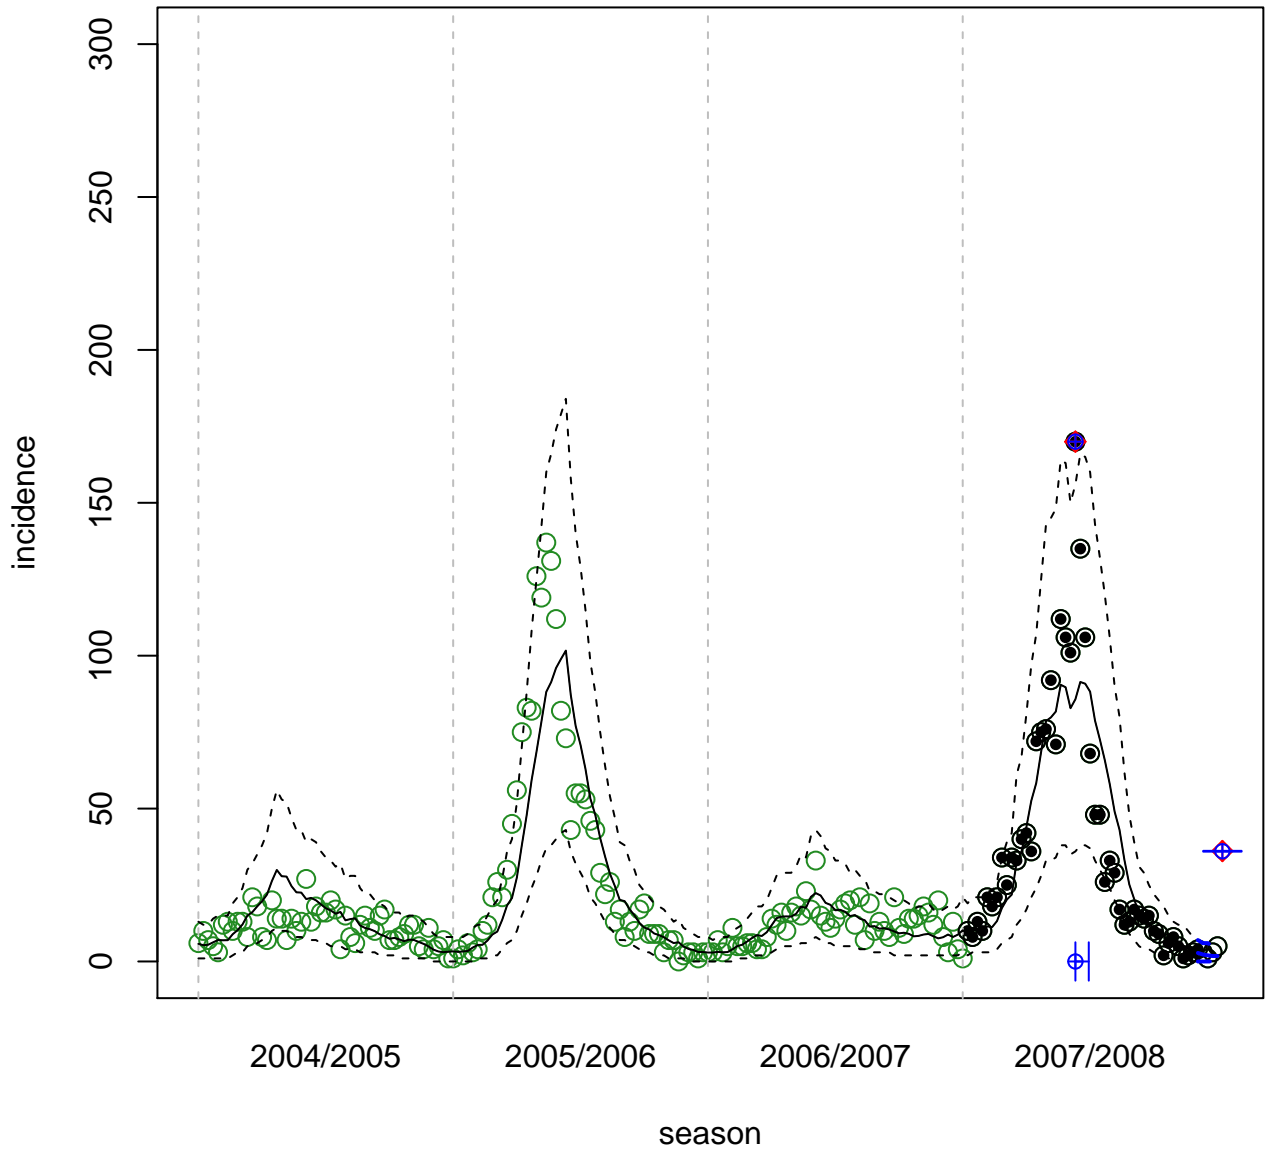

# sanjuan incidence

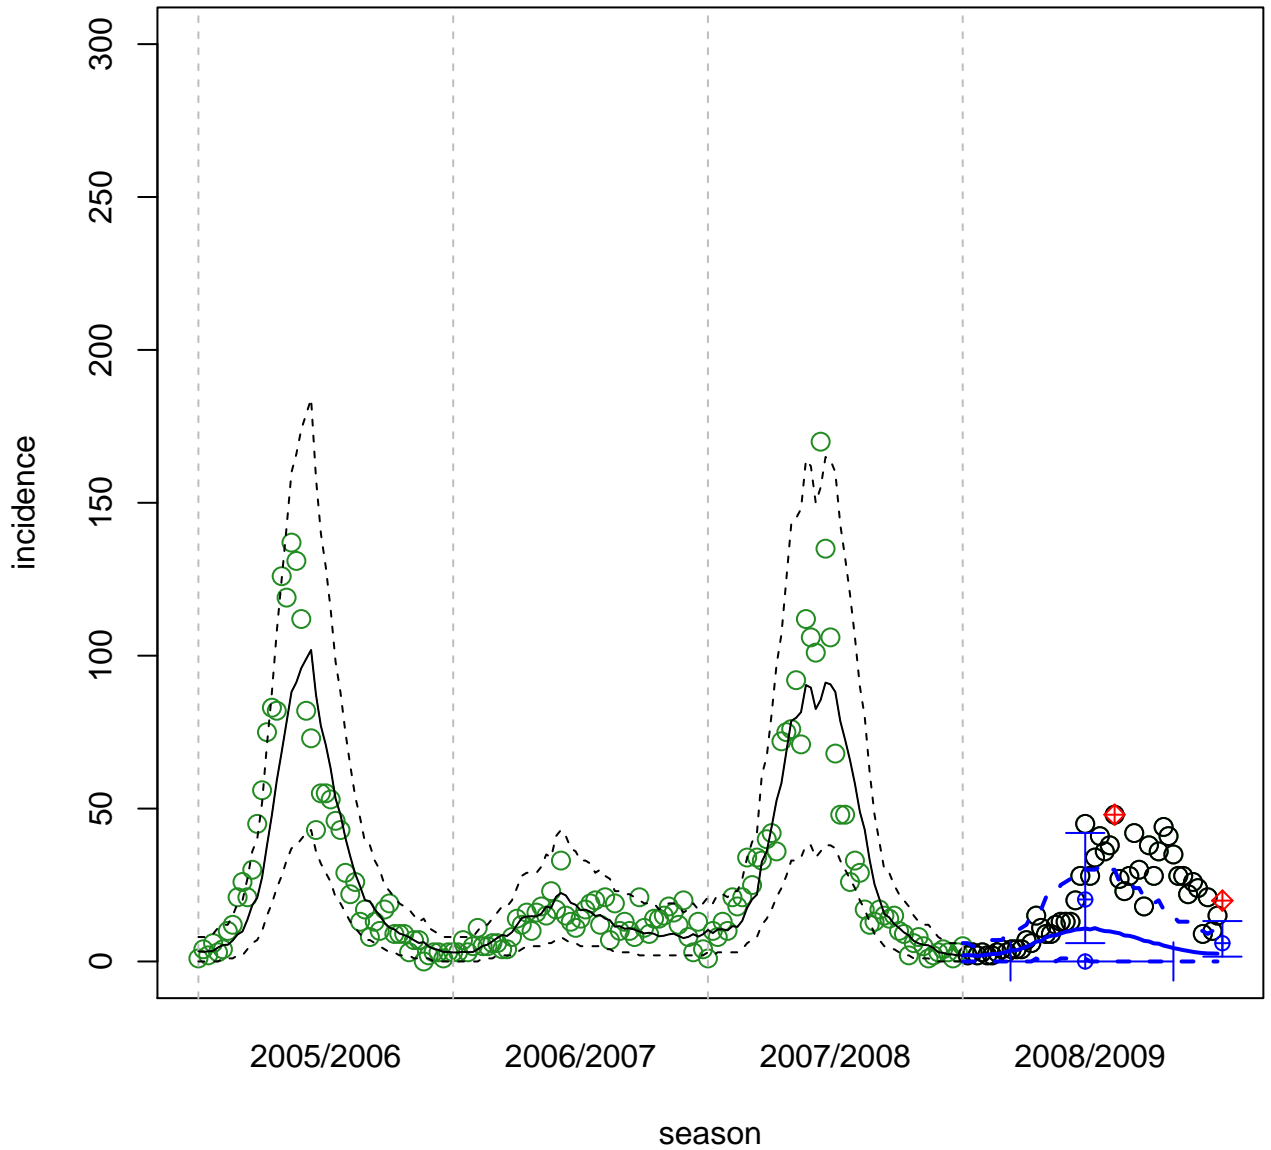



# sanjuan incidence

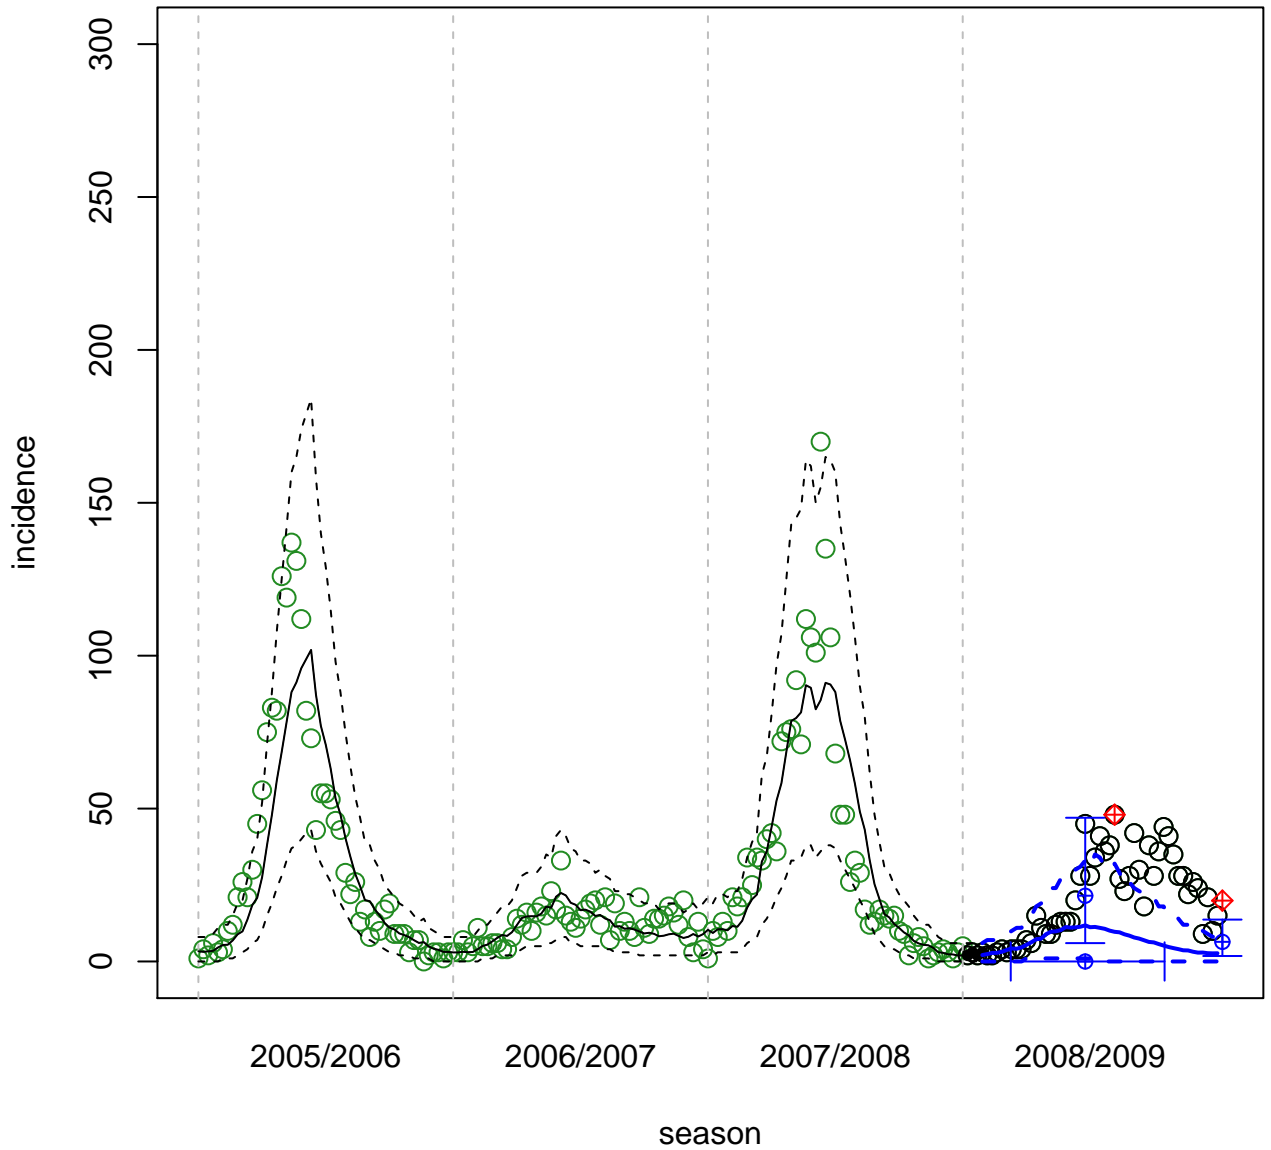

# sanjuan incidence

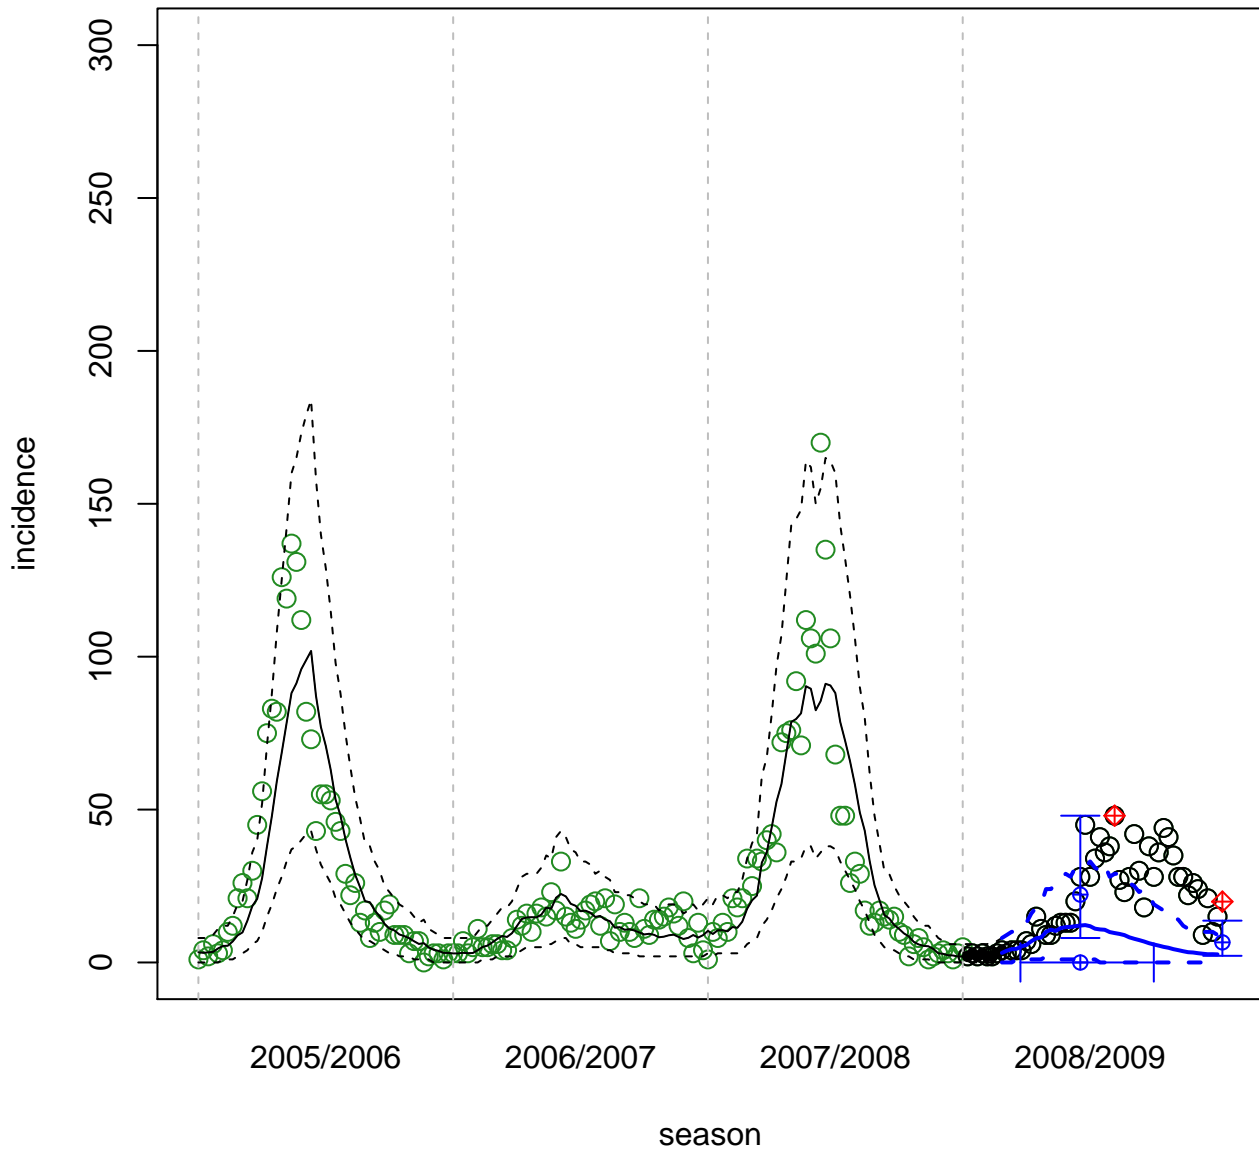

# sanjuan incidence

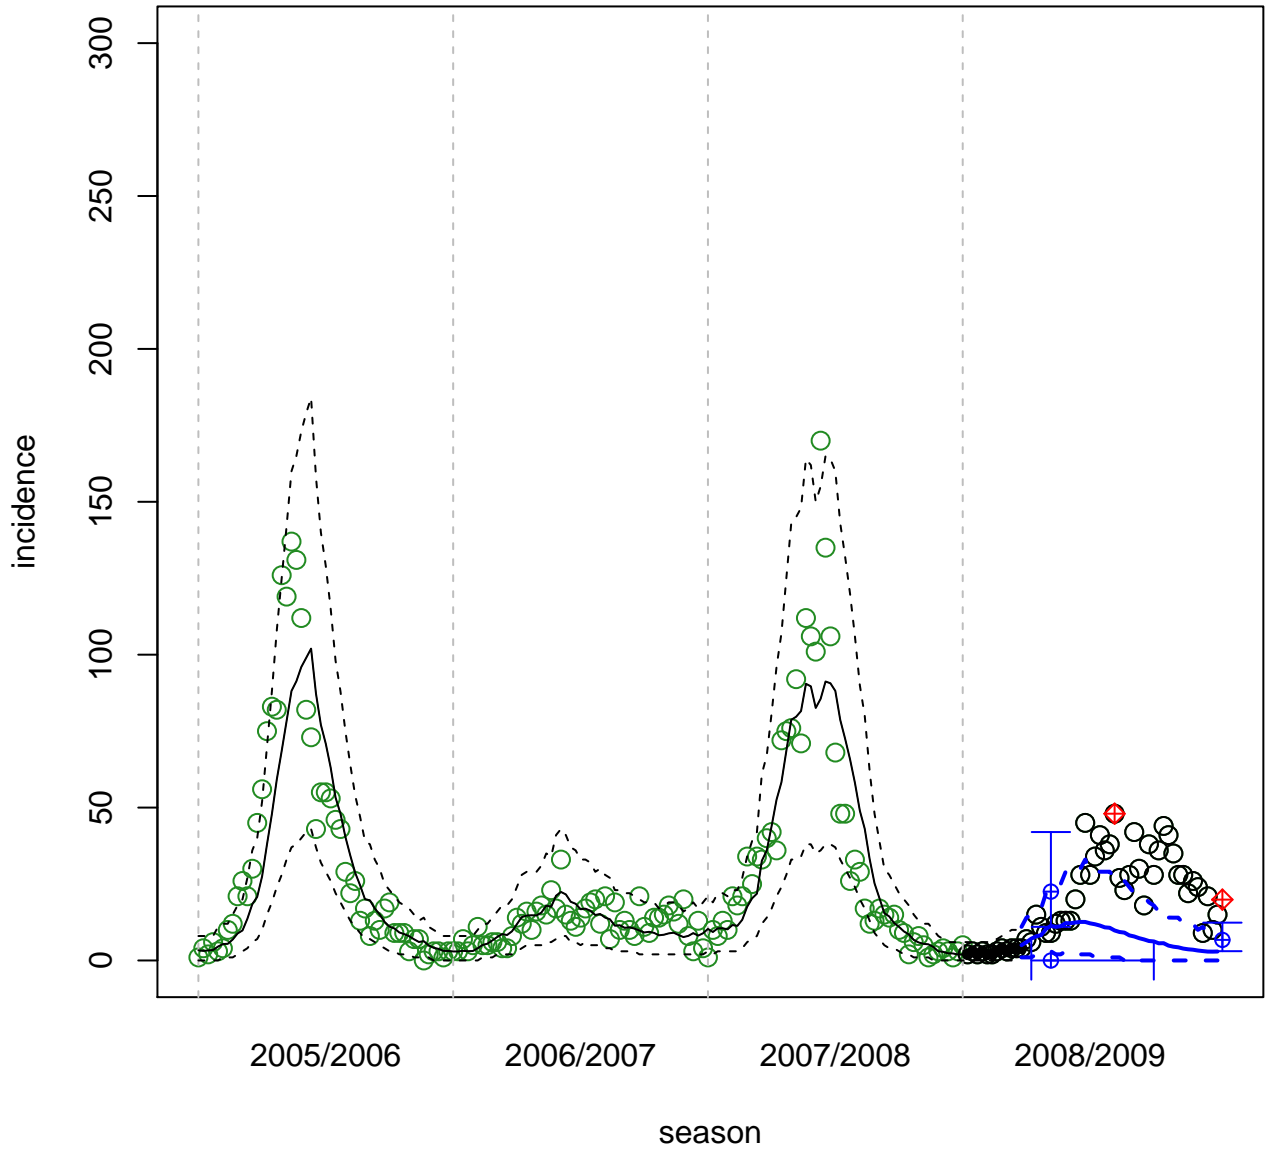

# sanjuan incidence

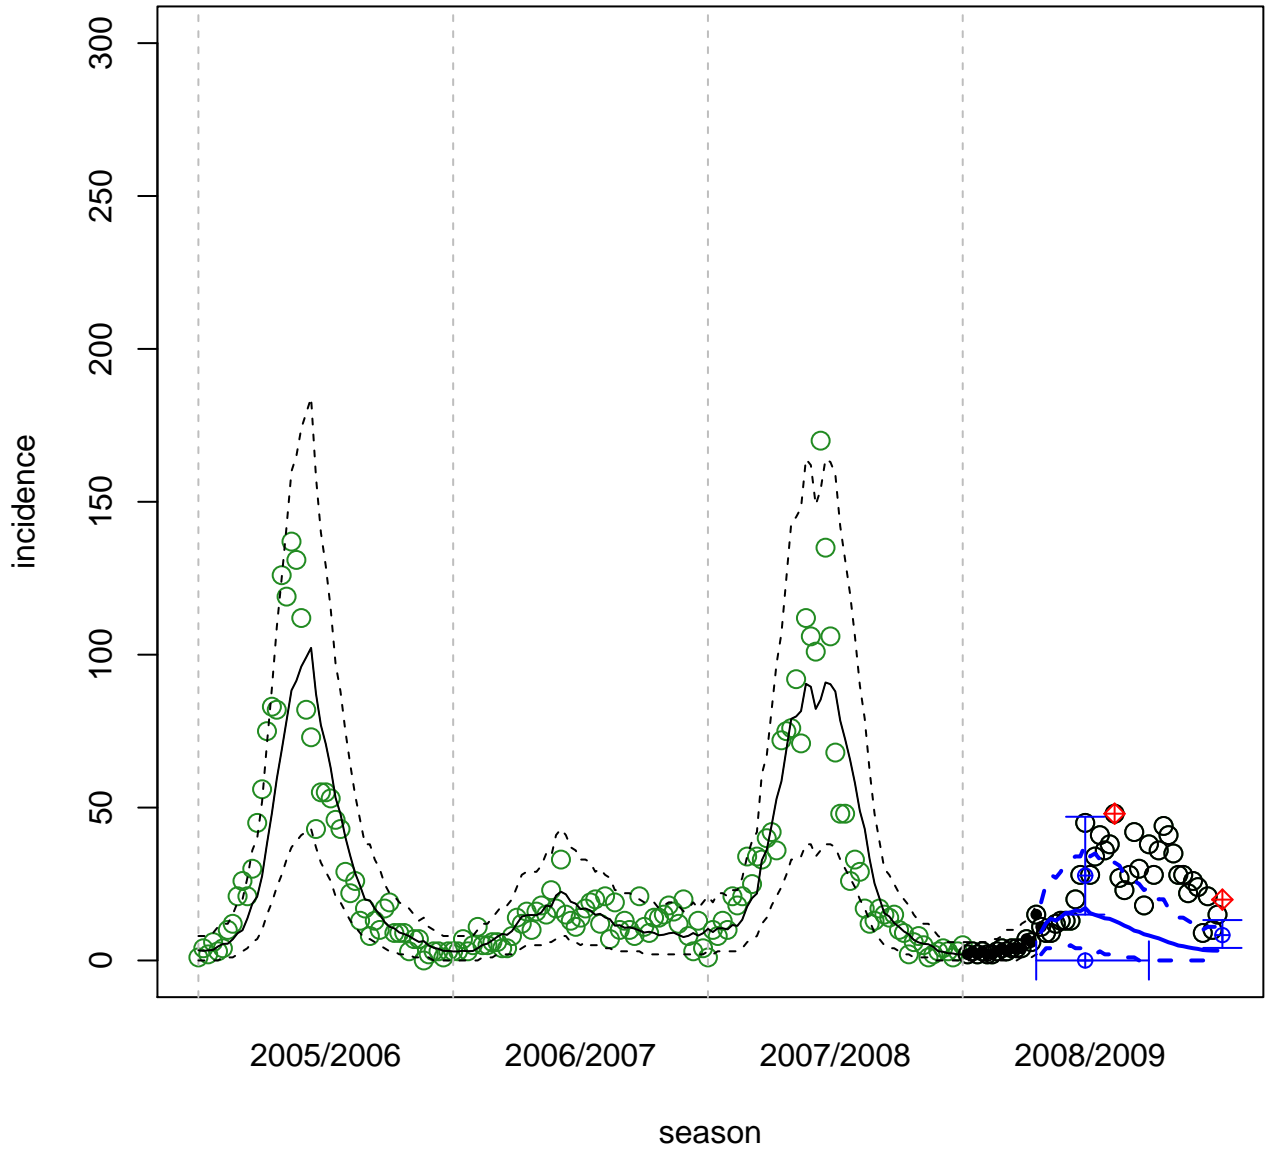

# sanjuan incidence

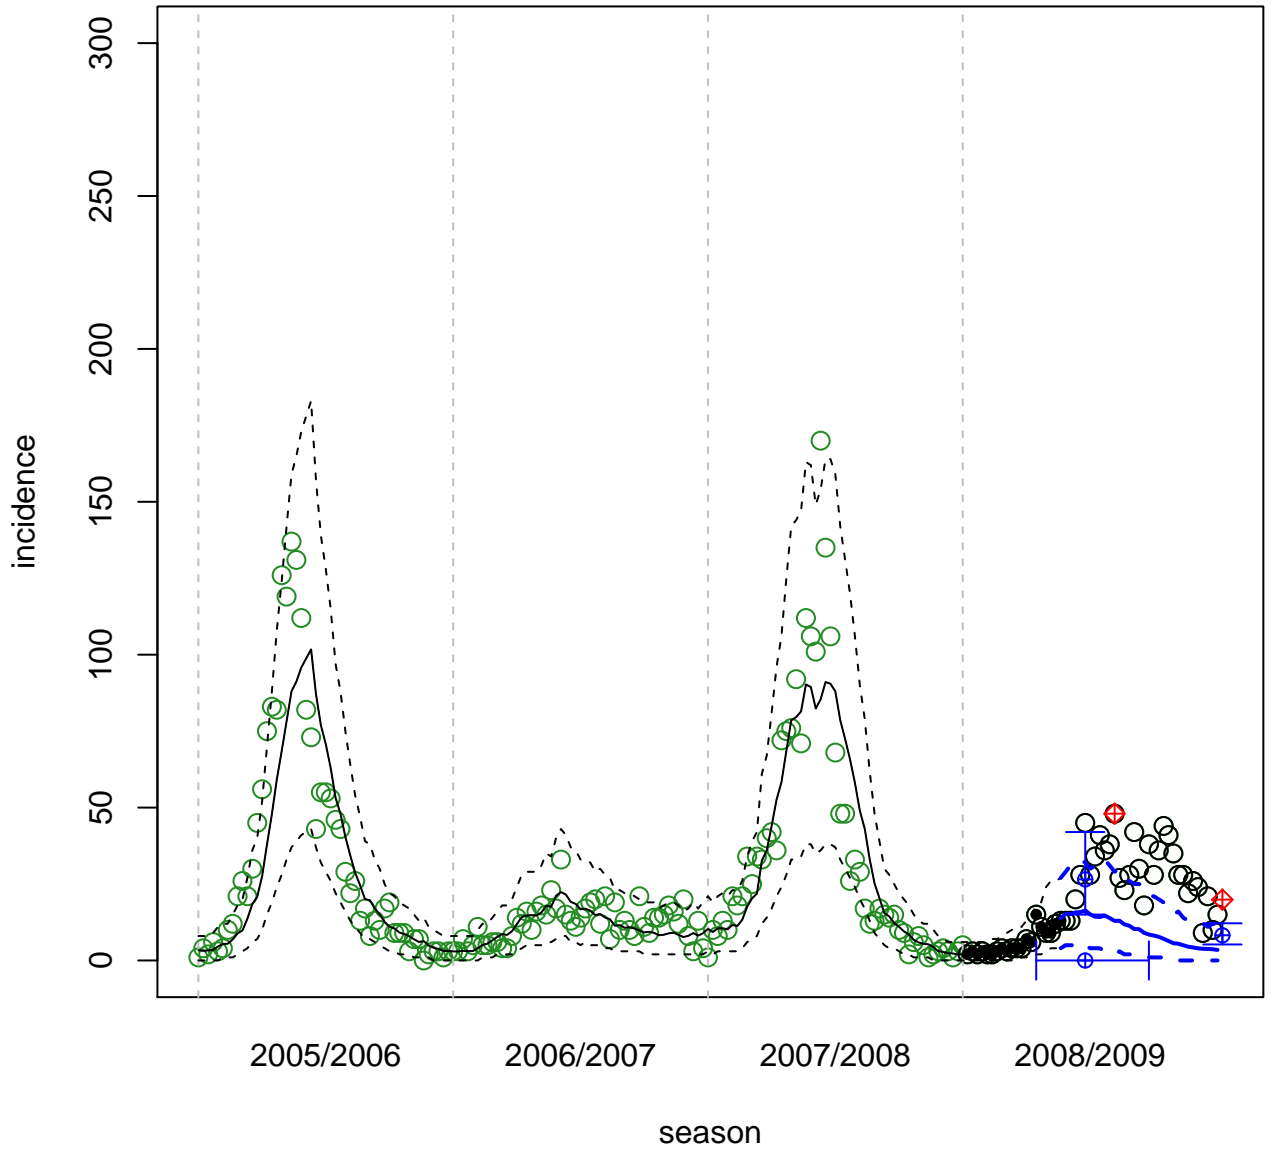

# sanjuan incidence

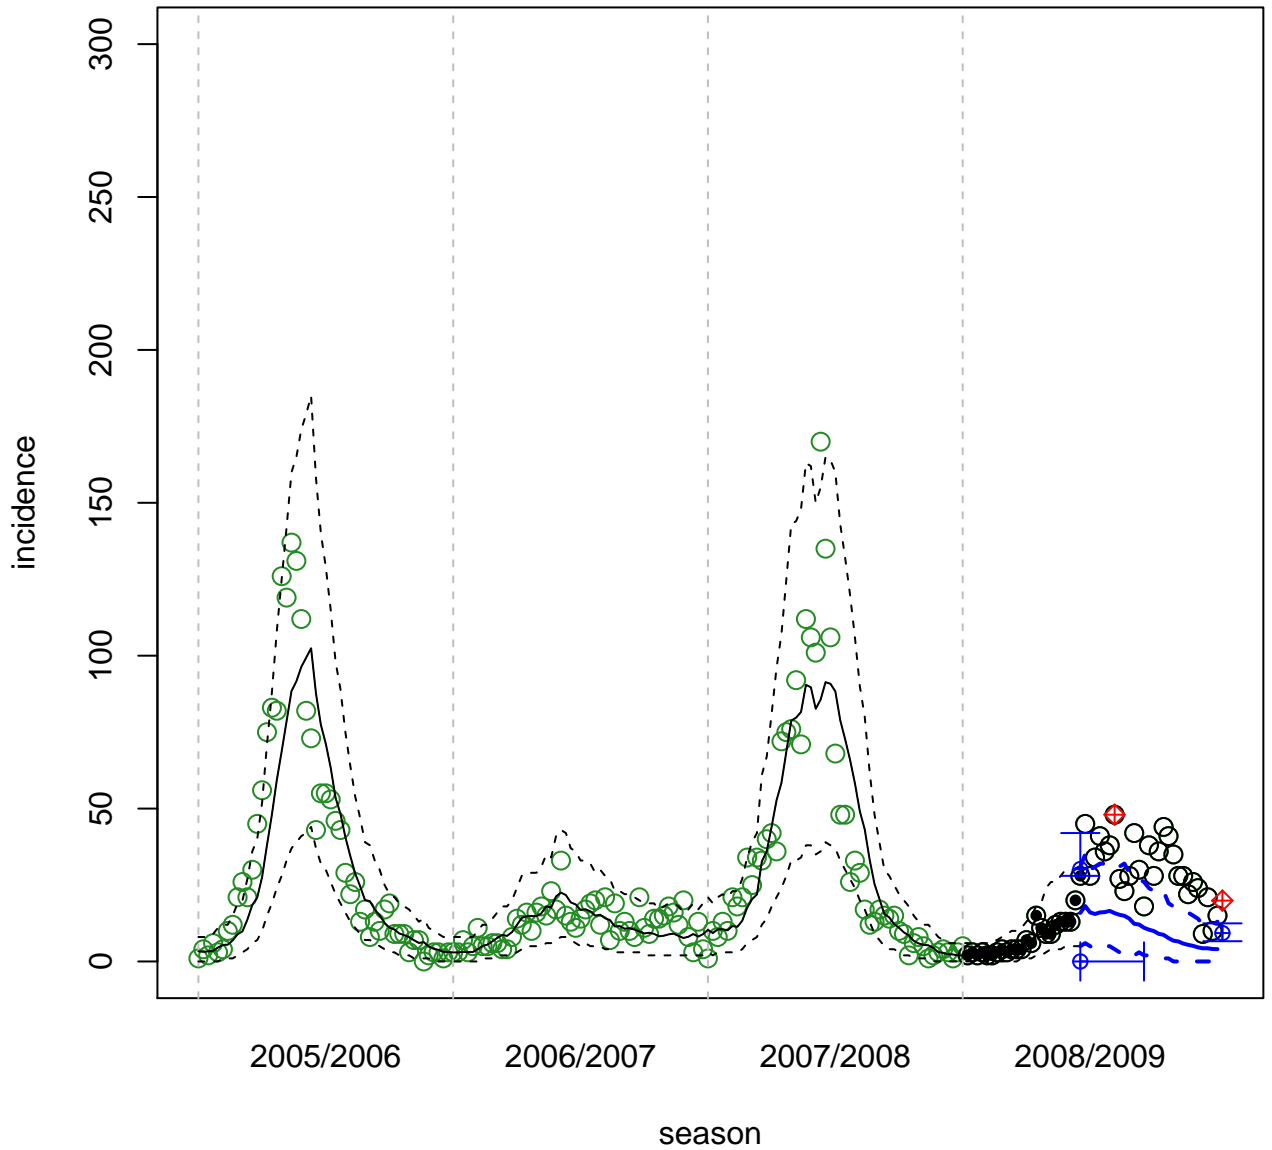

# sanjuan incidence

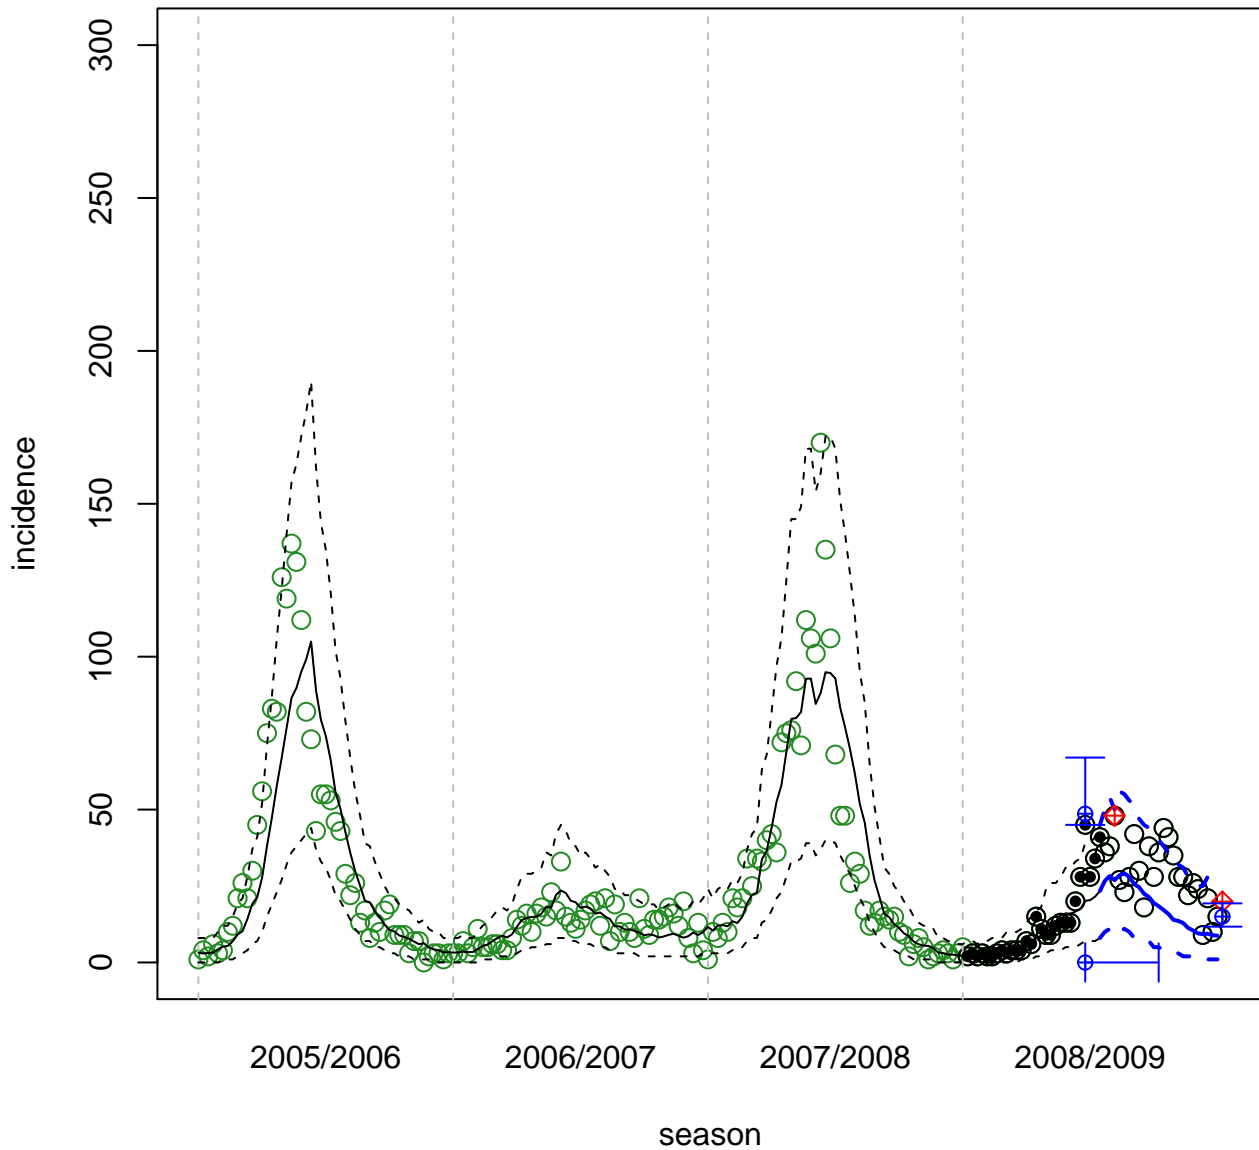

# sanjuan incidence

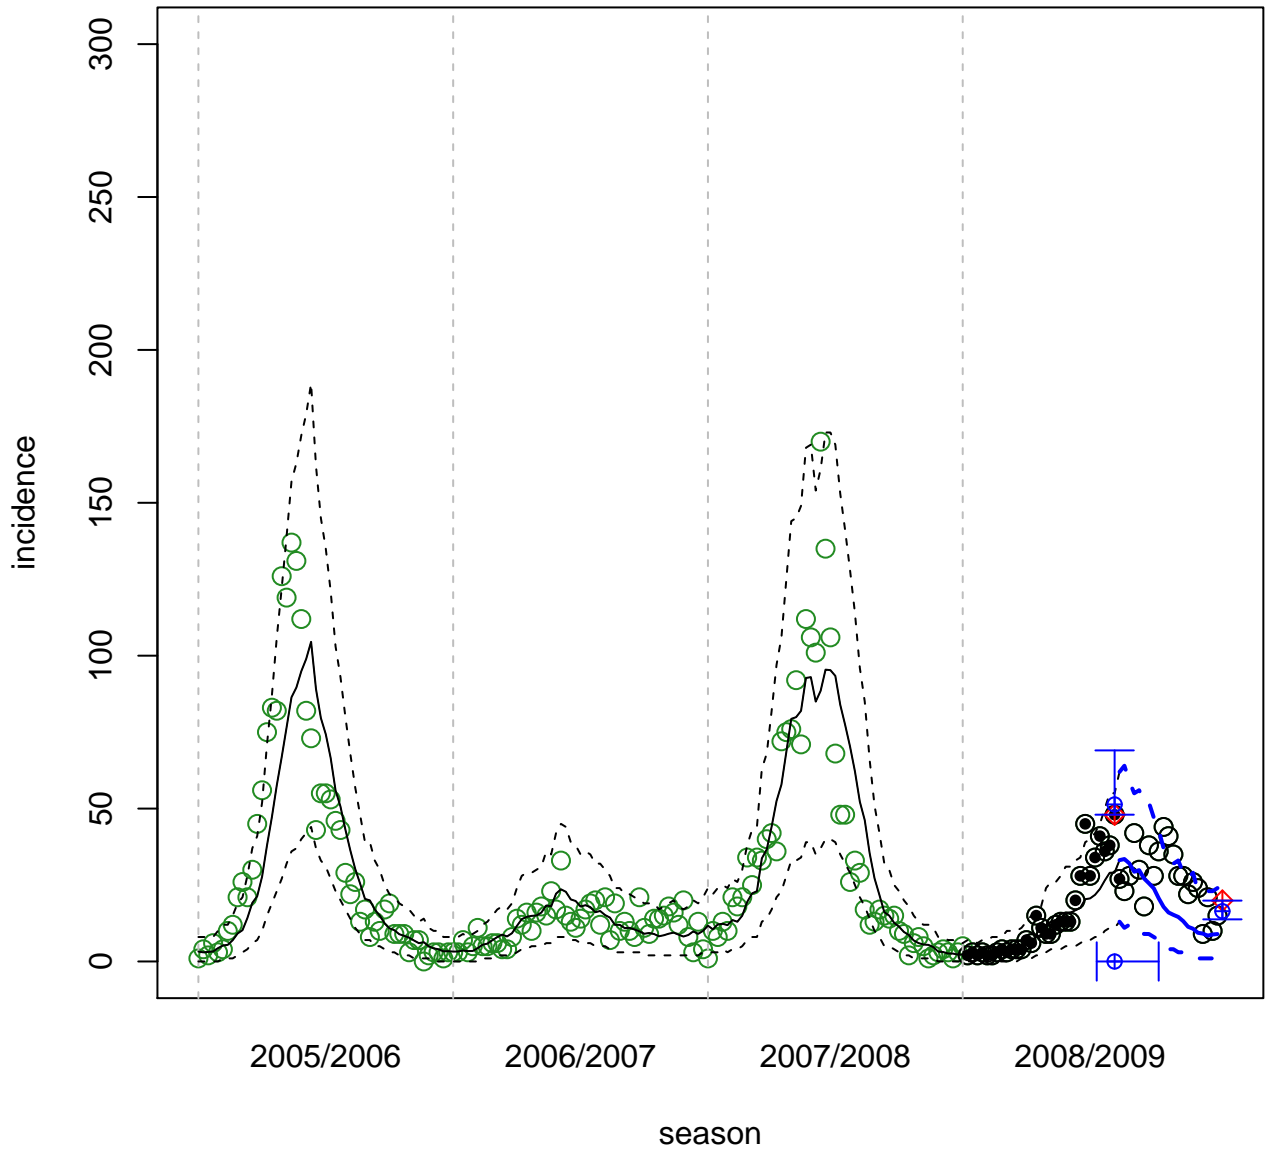



# sanjuan incidence

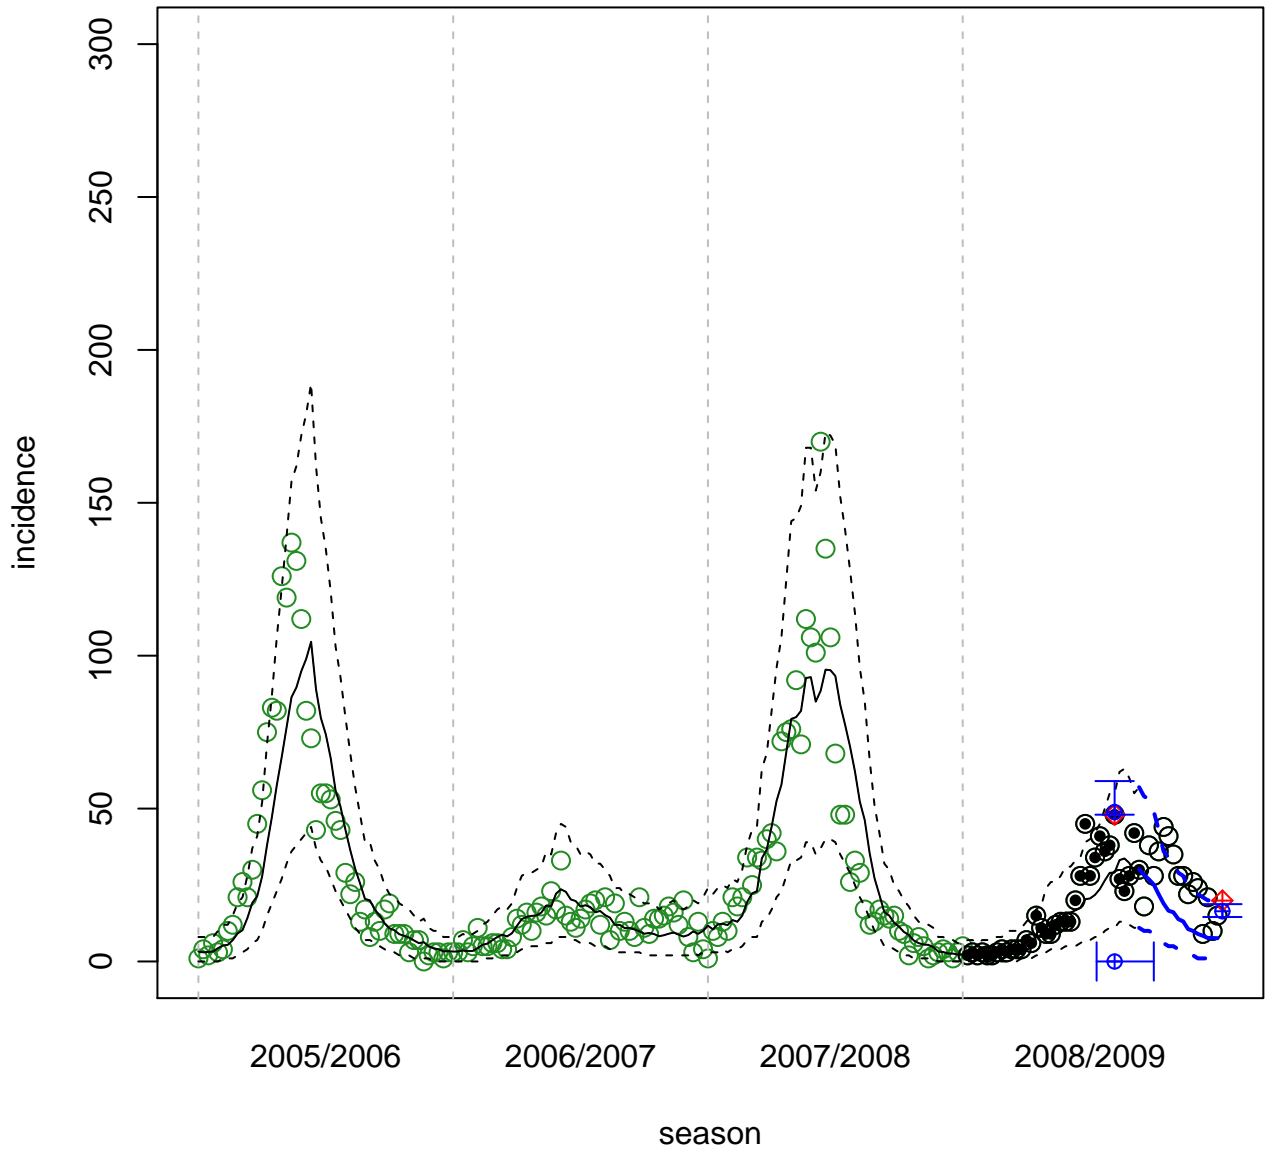

# sanjuan incidence

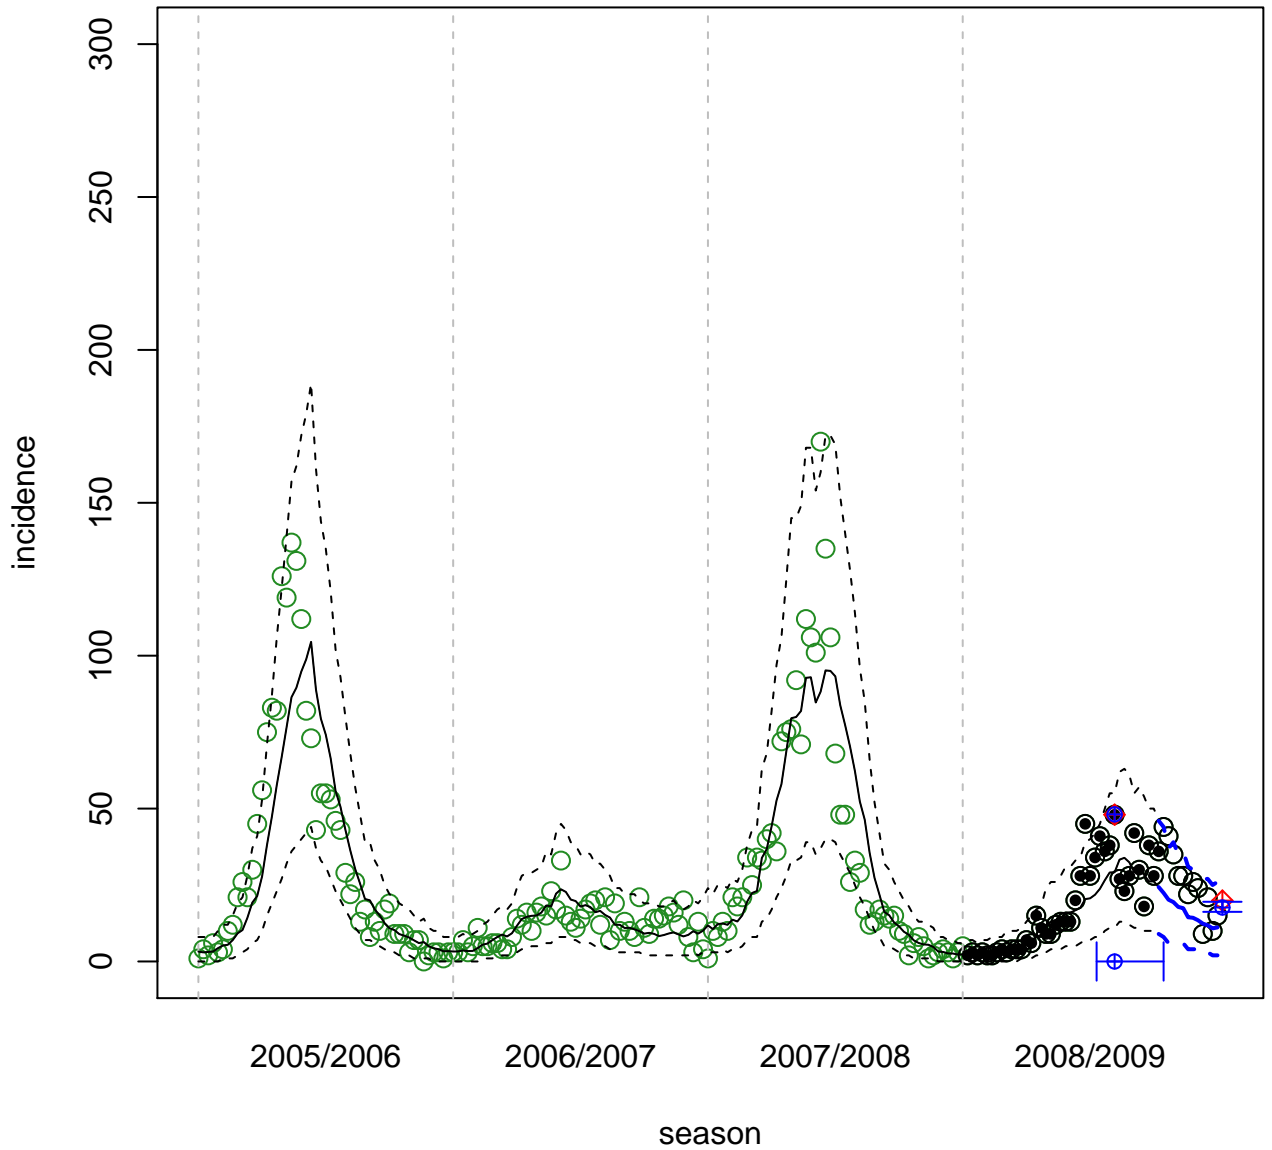

# sanjuan incidence

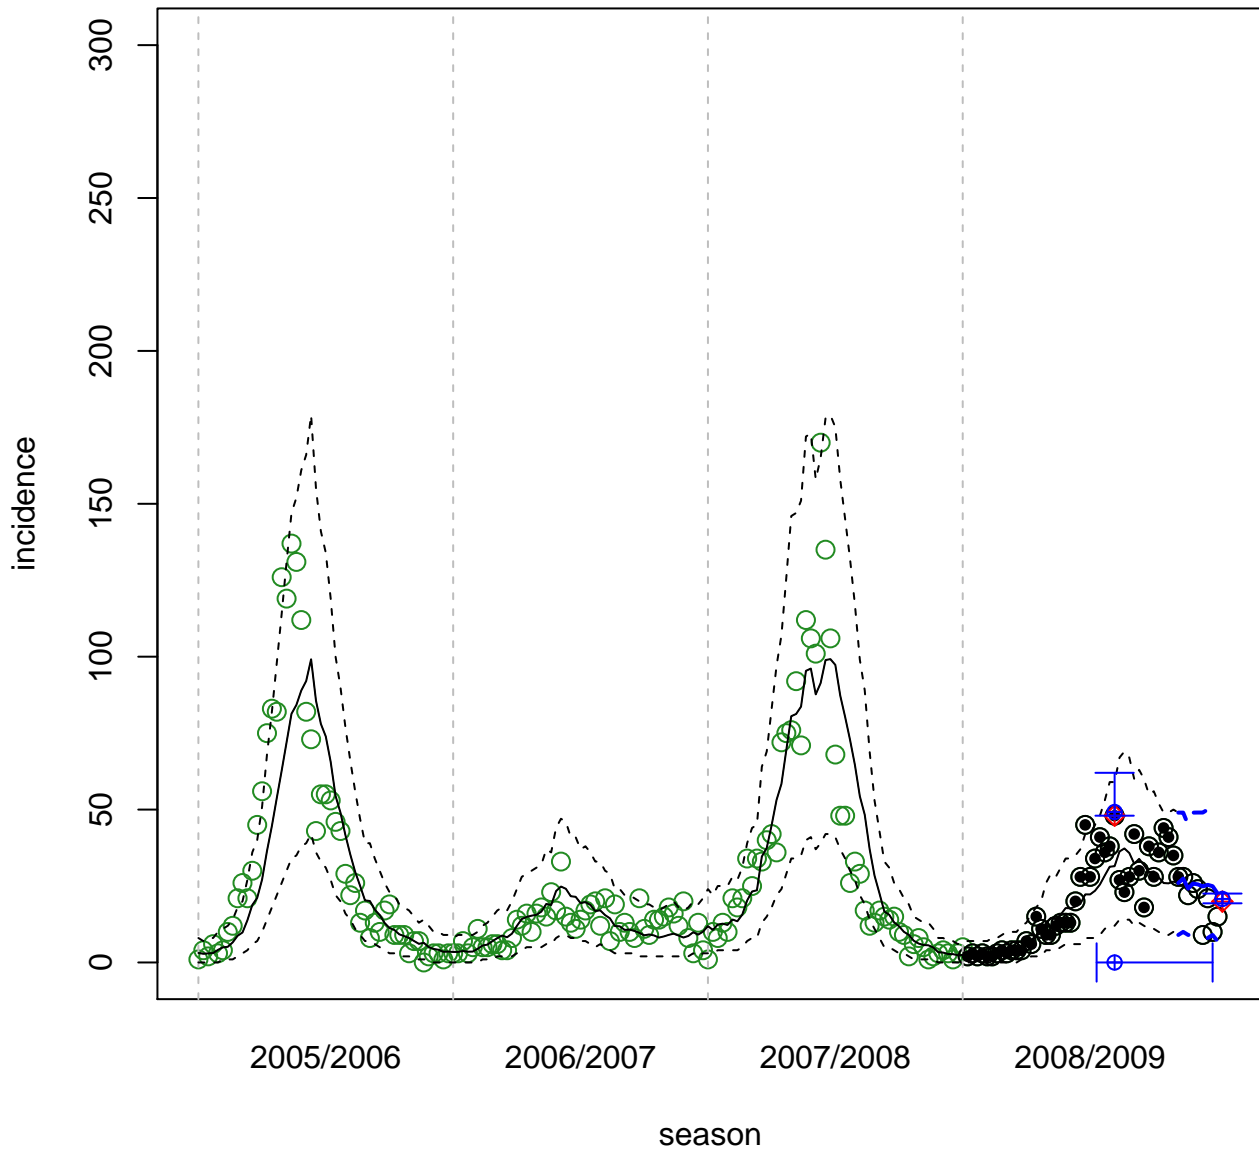

# sanjuan incidence

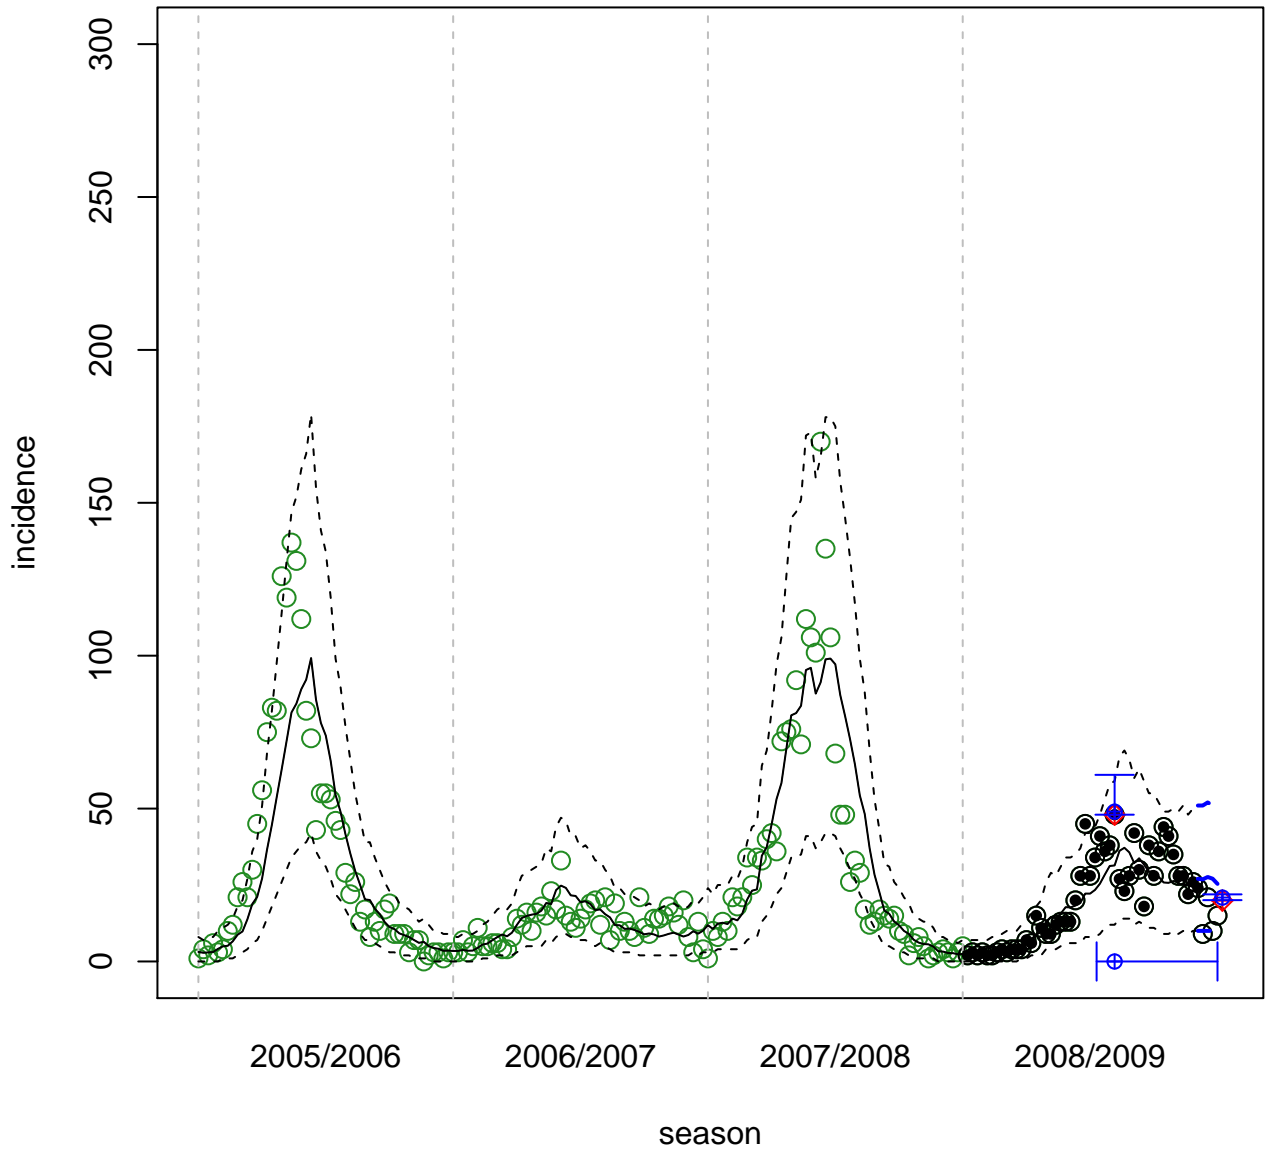

# sanjuan incidence

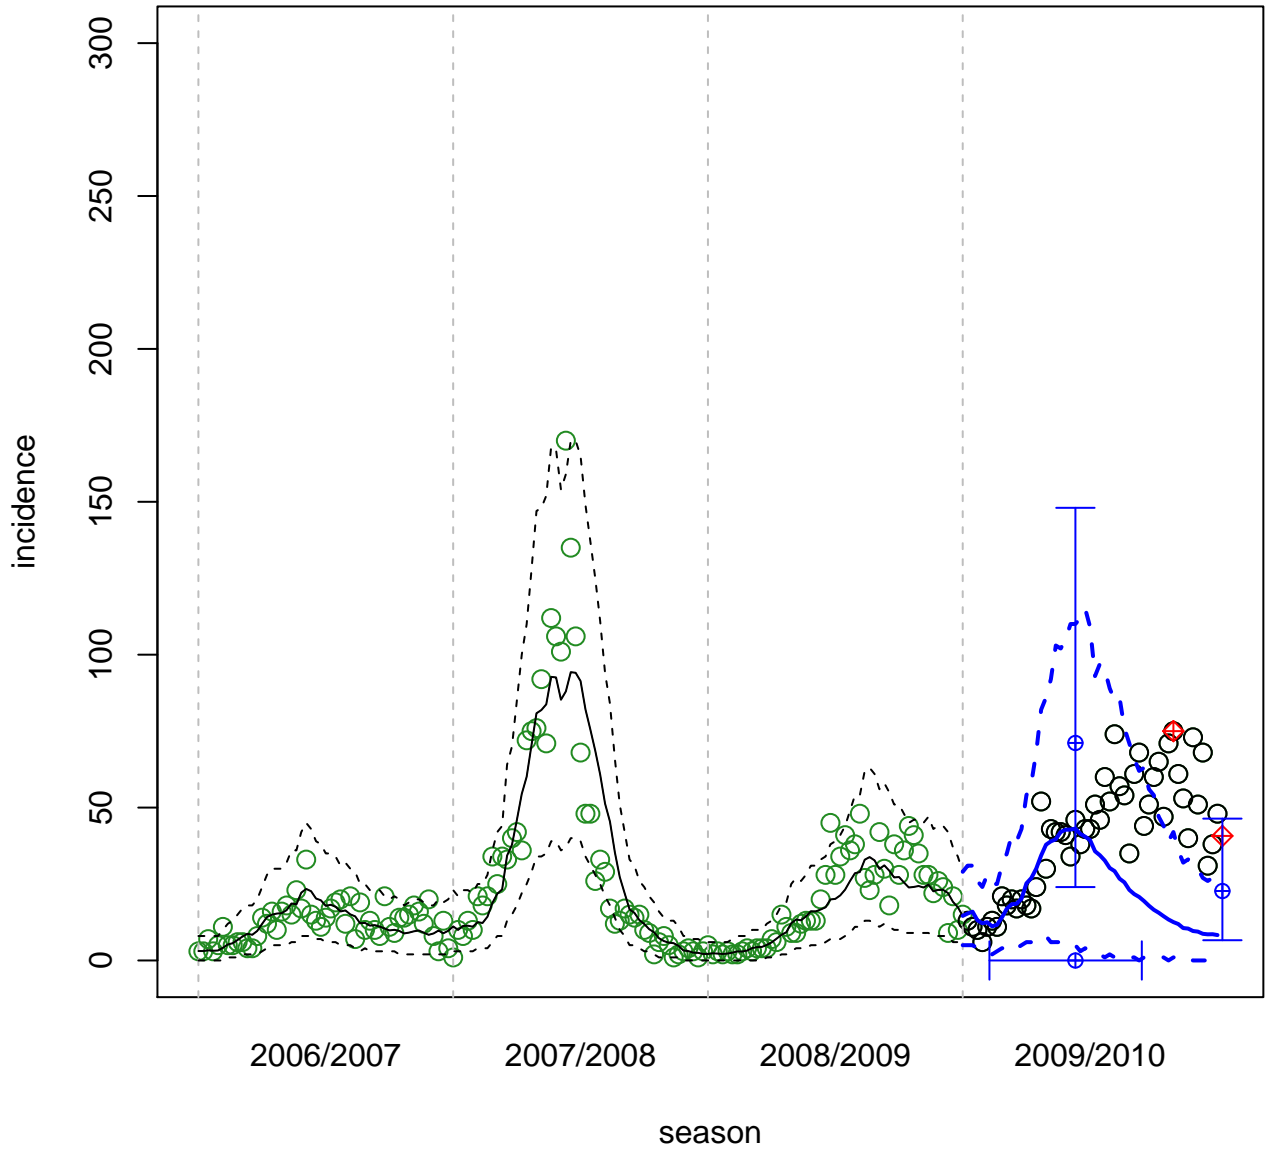

# sanjuan incidence

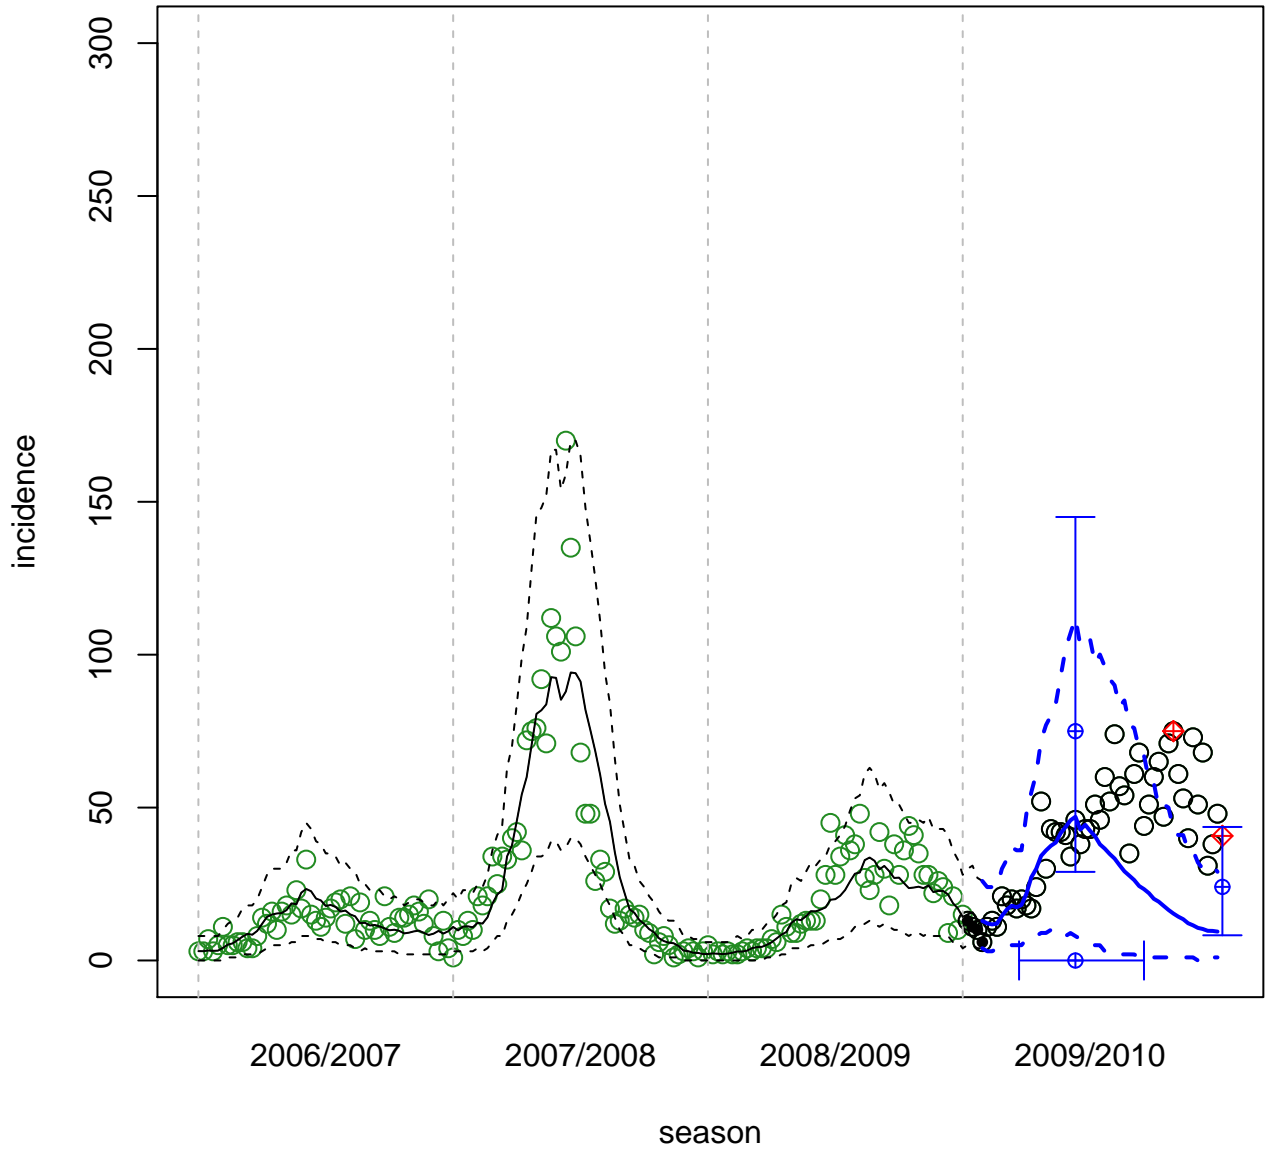

# sanjuan incidence

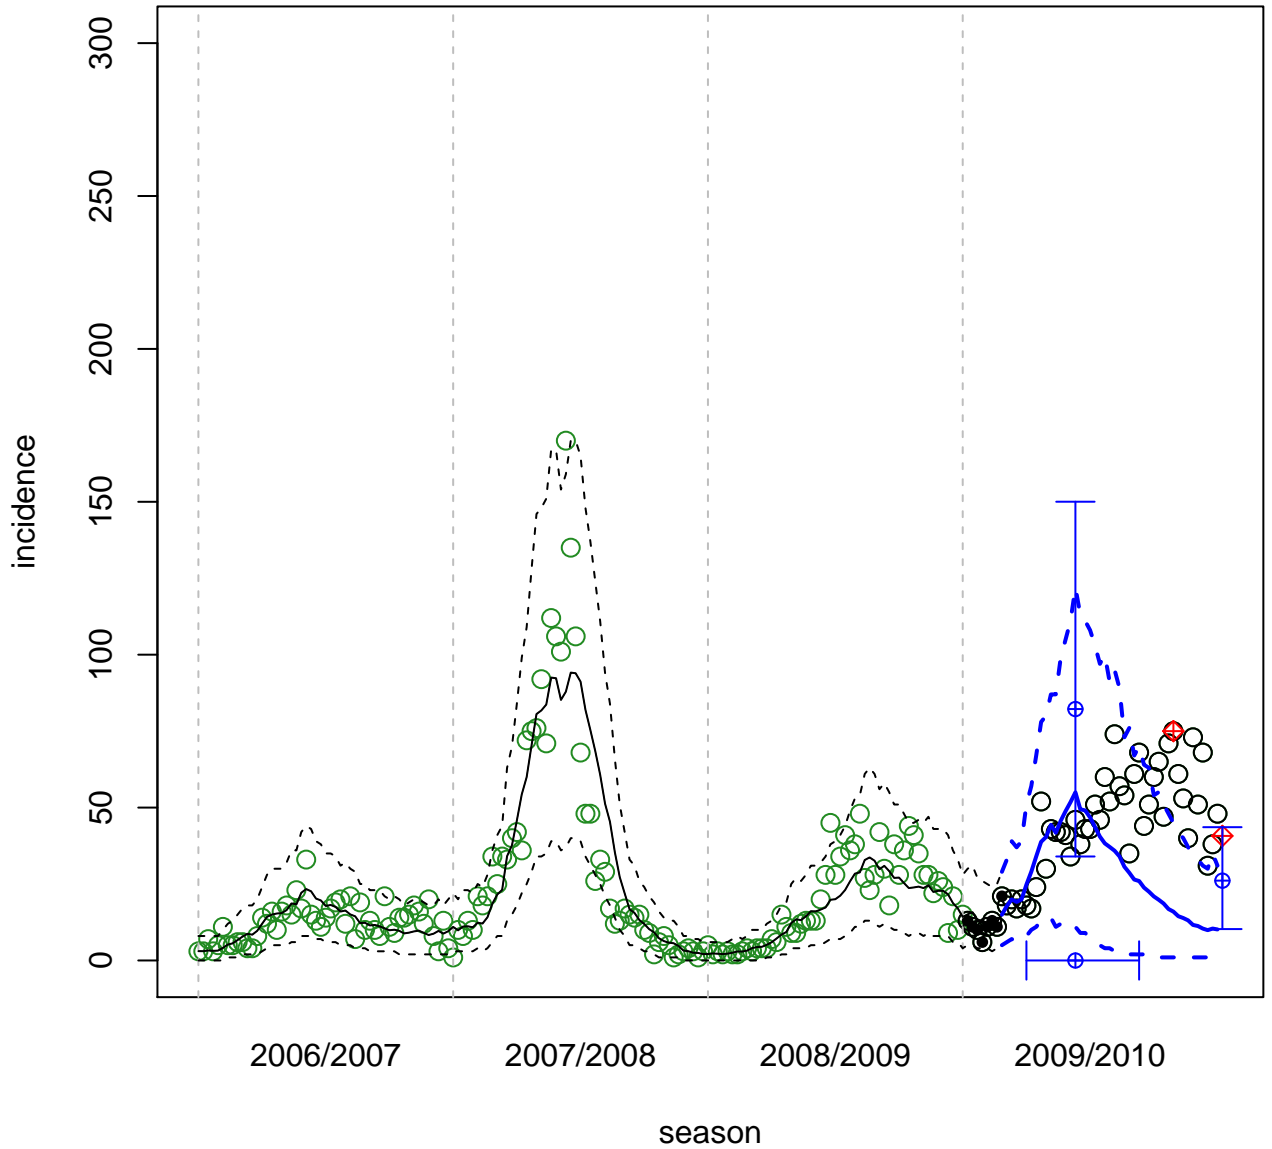

# sanjuan incidence

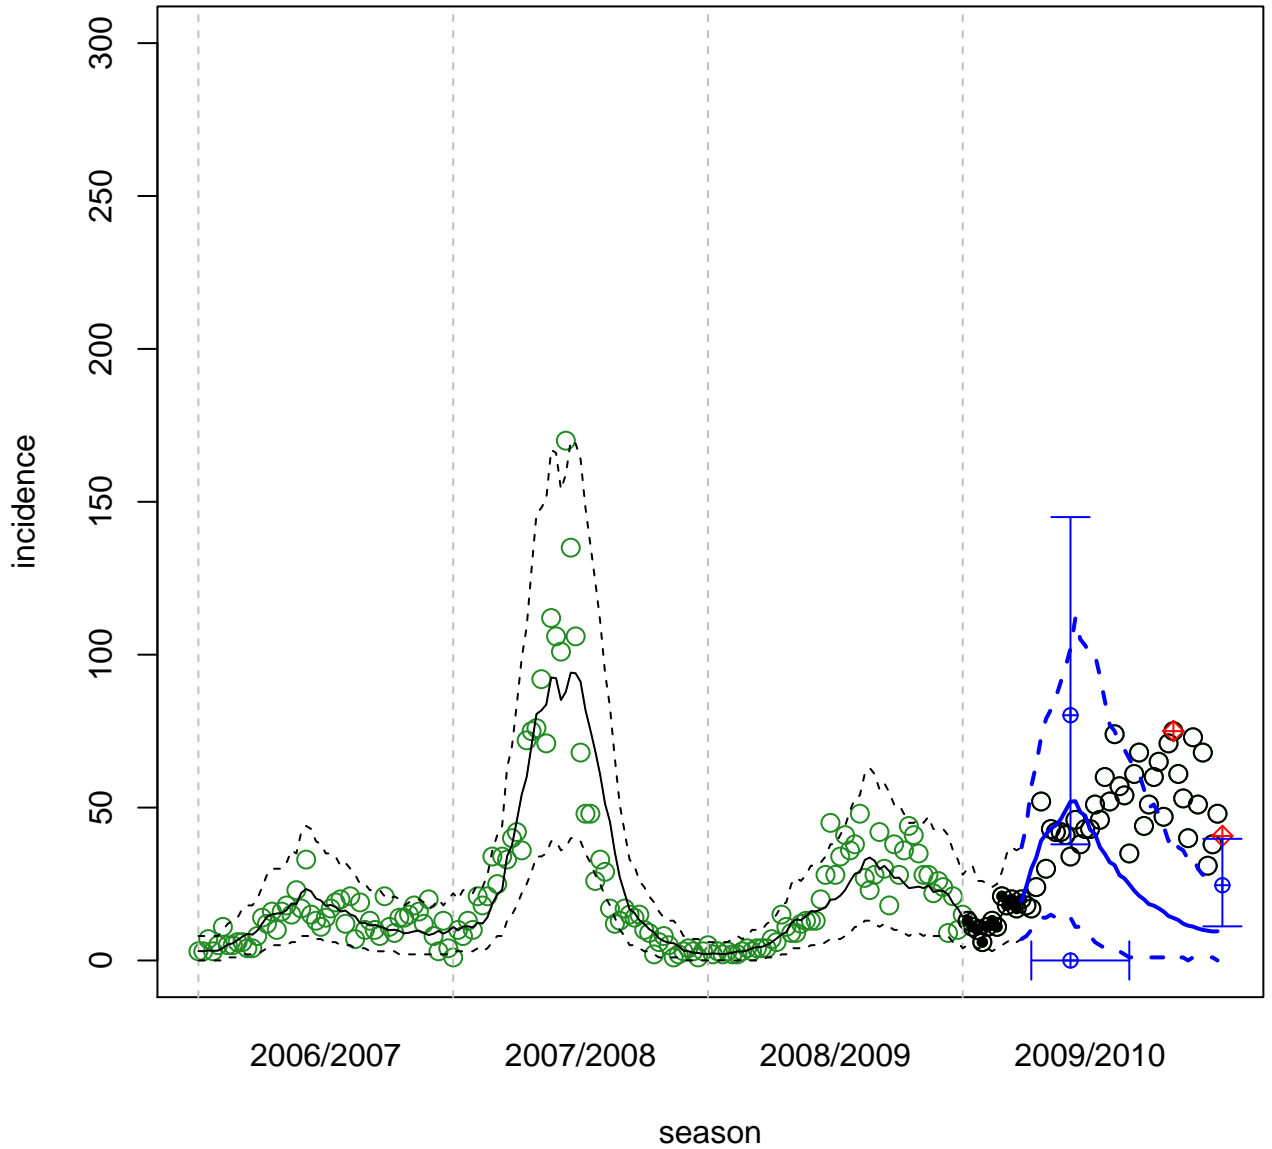



# sanjuan incidence

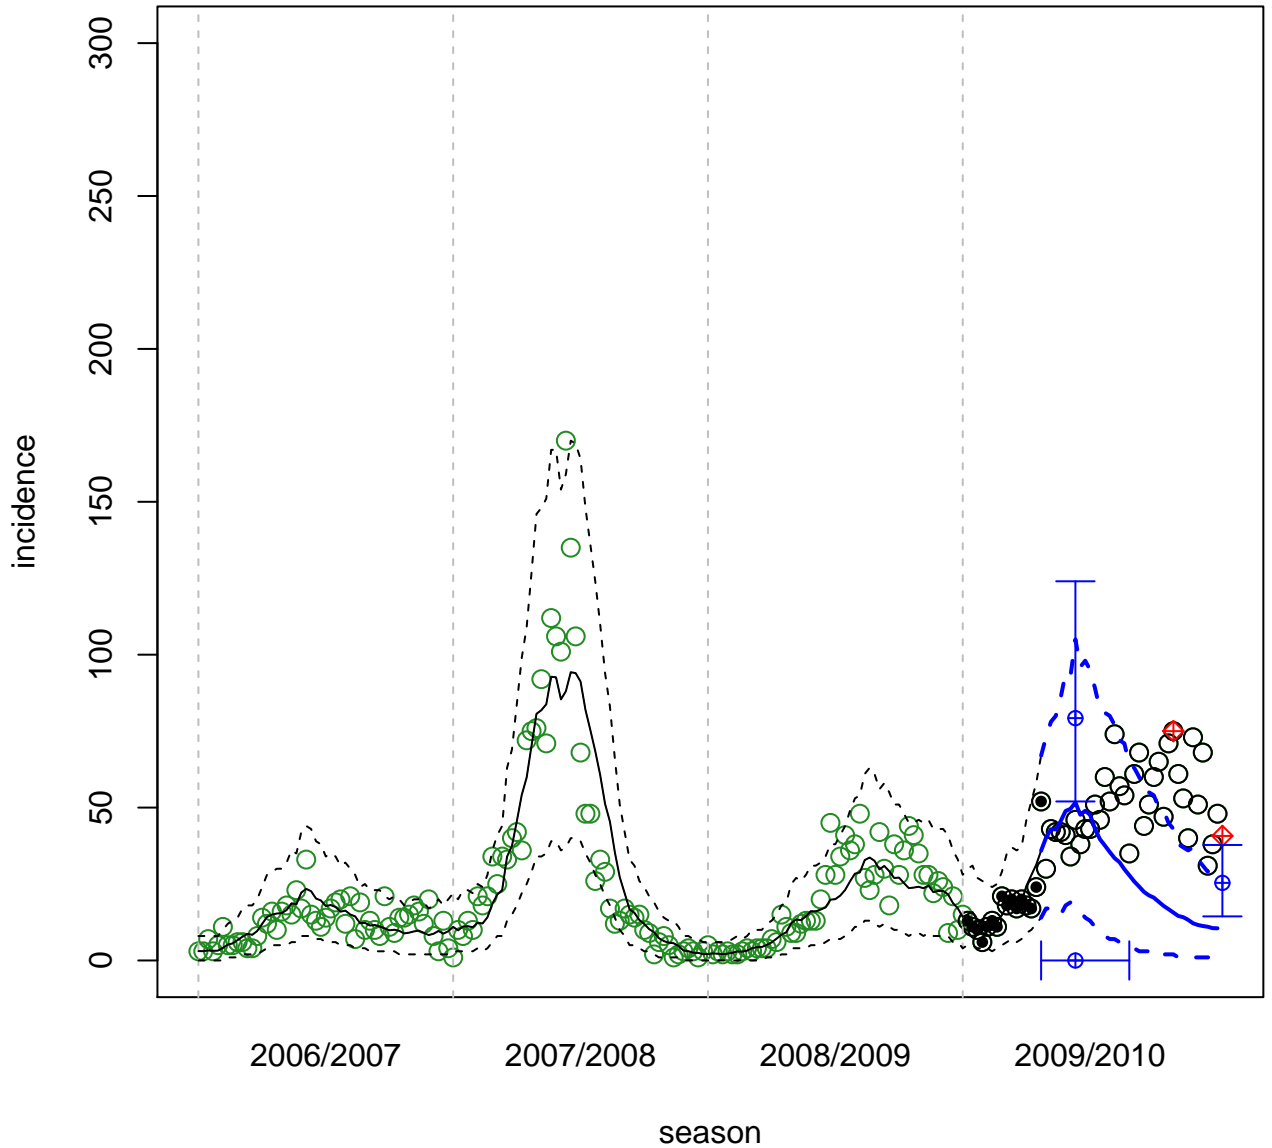

# sanjuan incidence

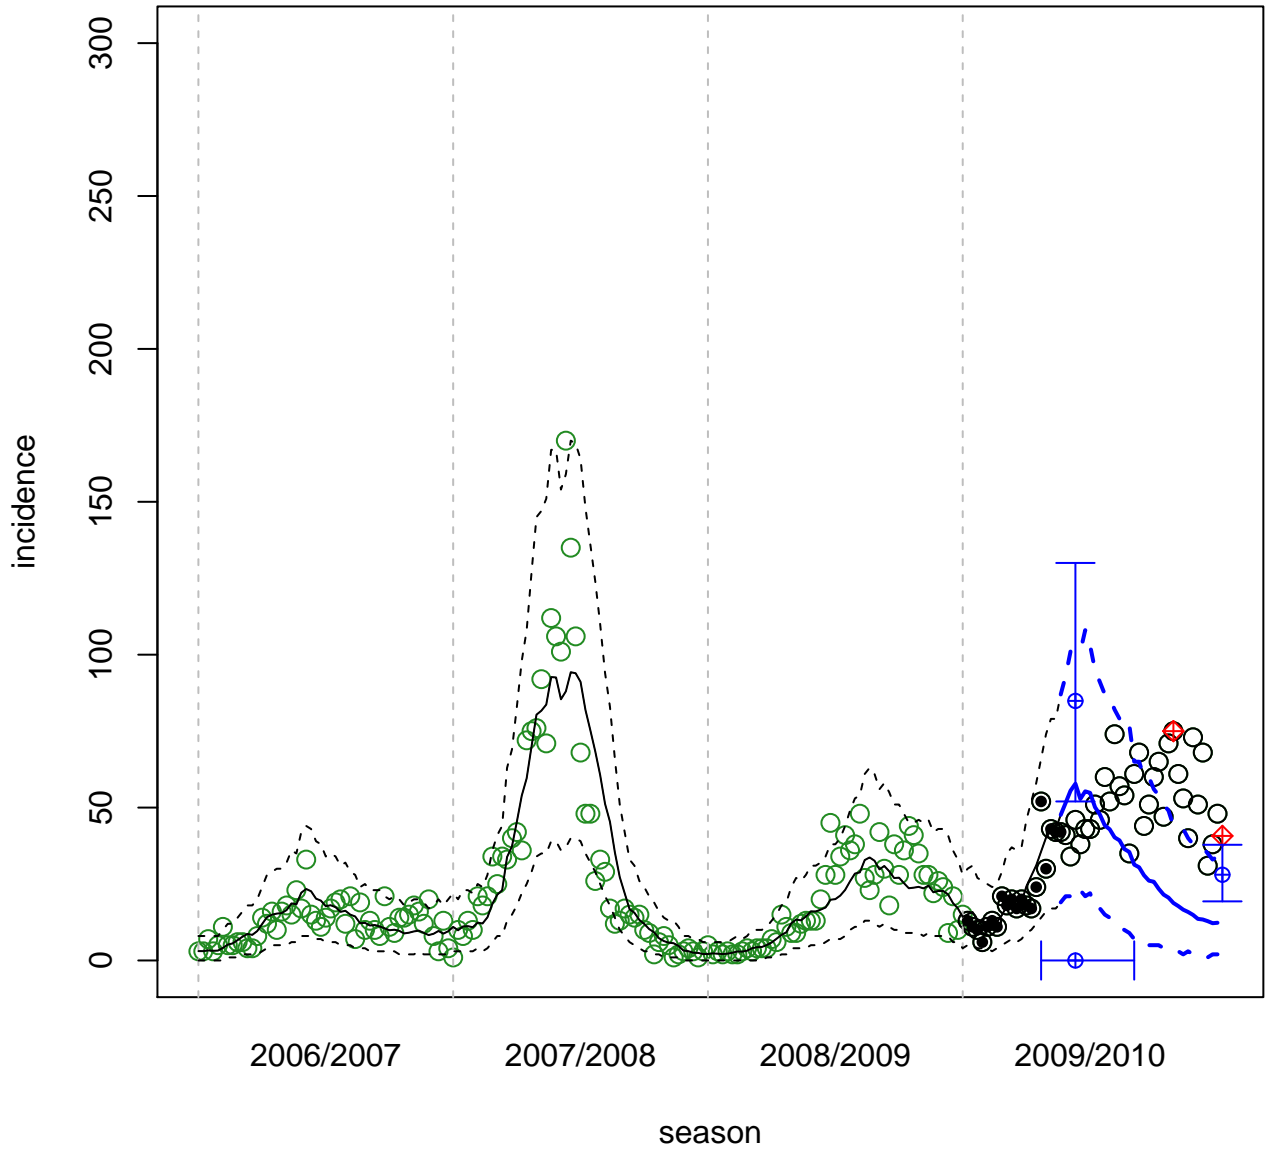

# sanjuan incidence

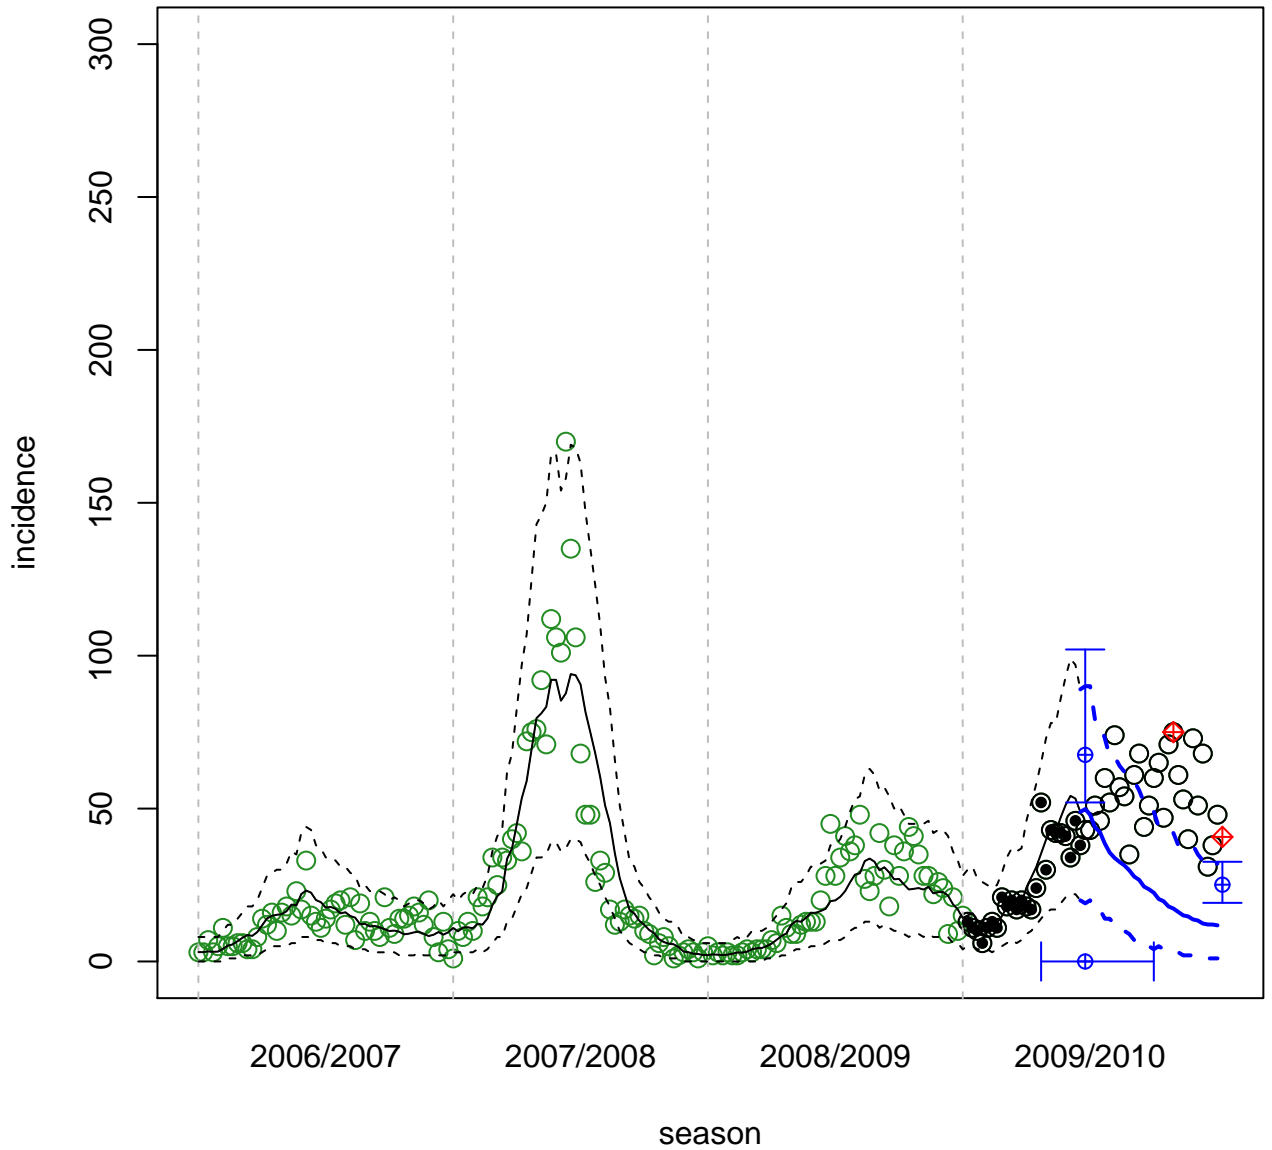

# sanjuan incidence

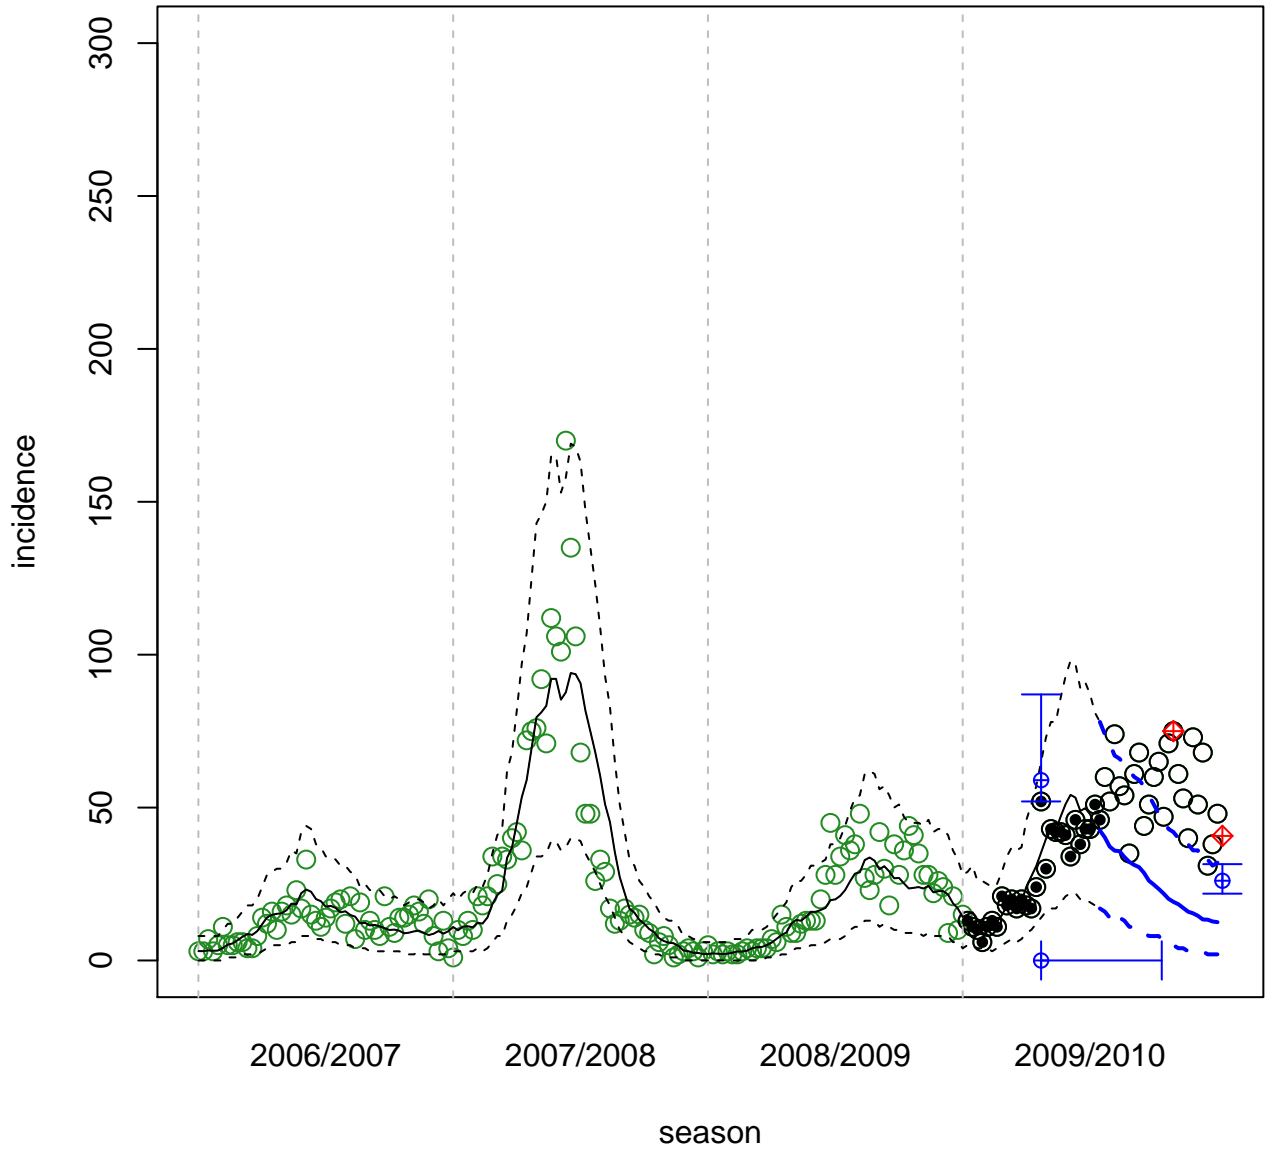

# sanjuan incidence

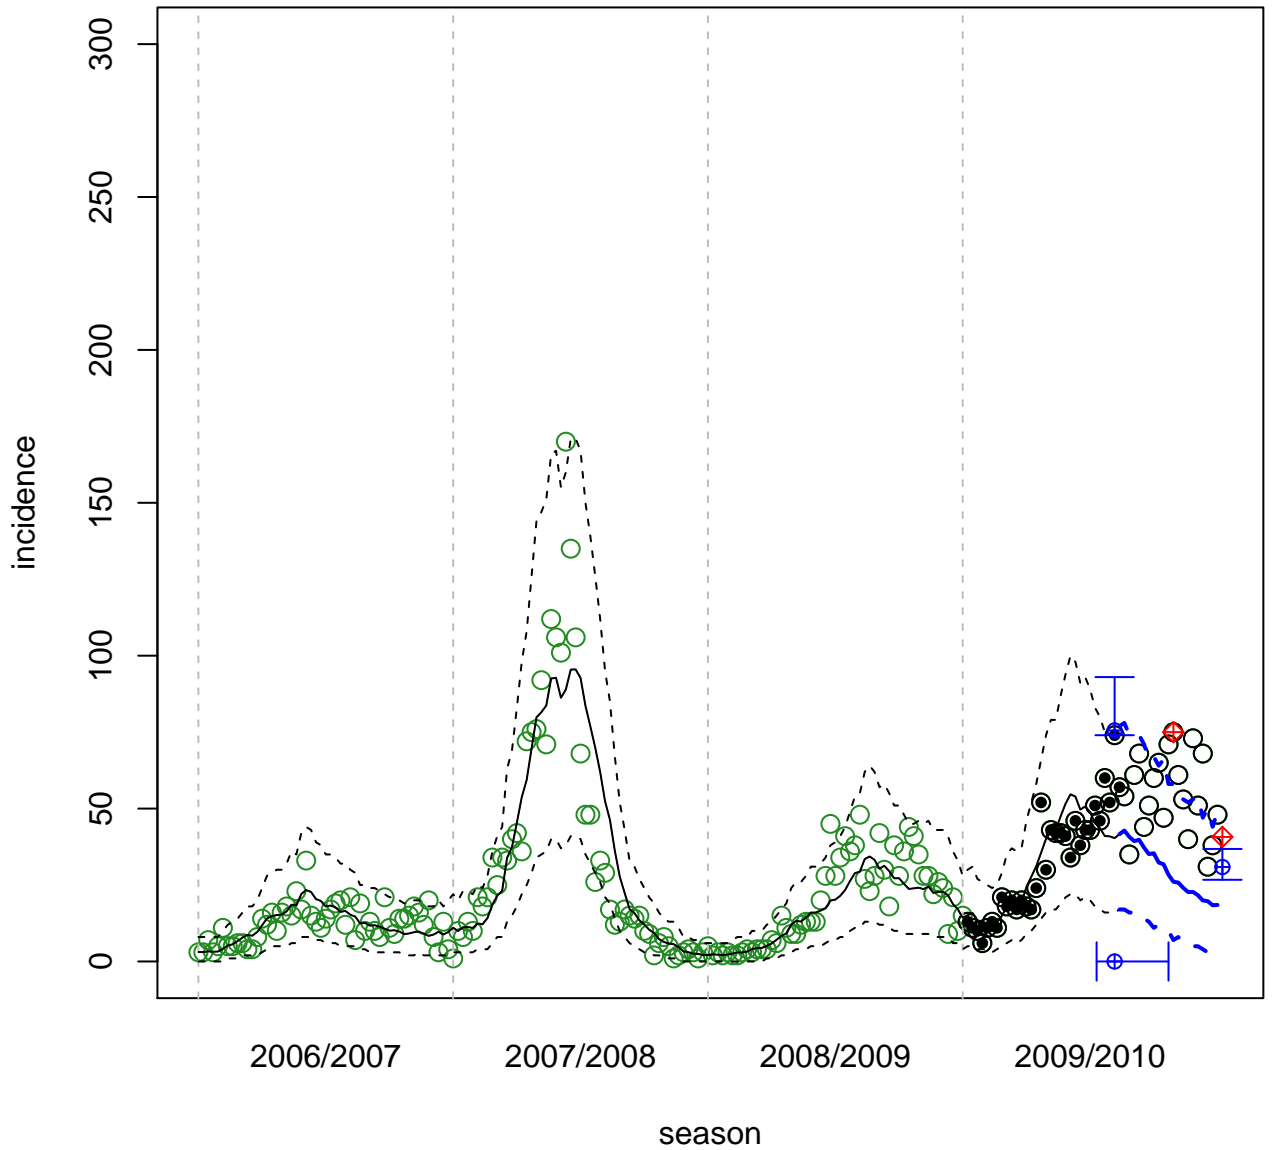

# sanjuan incidence

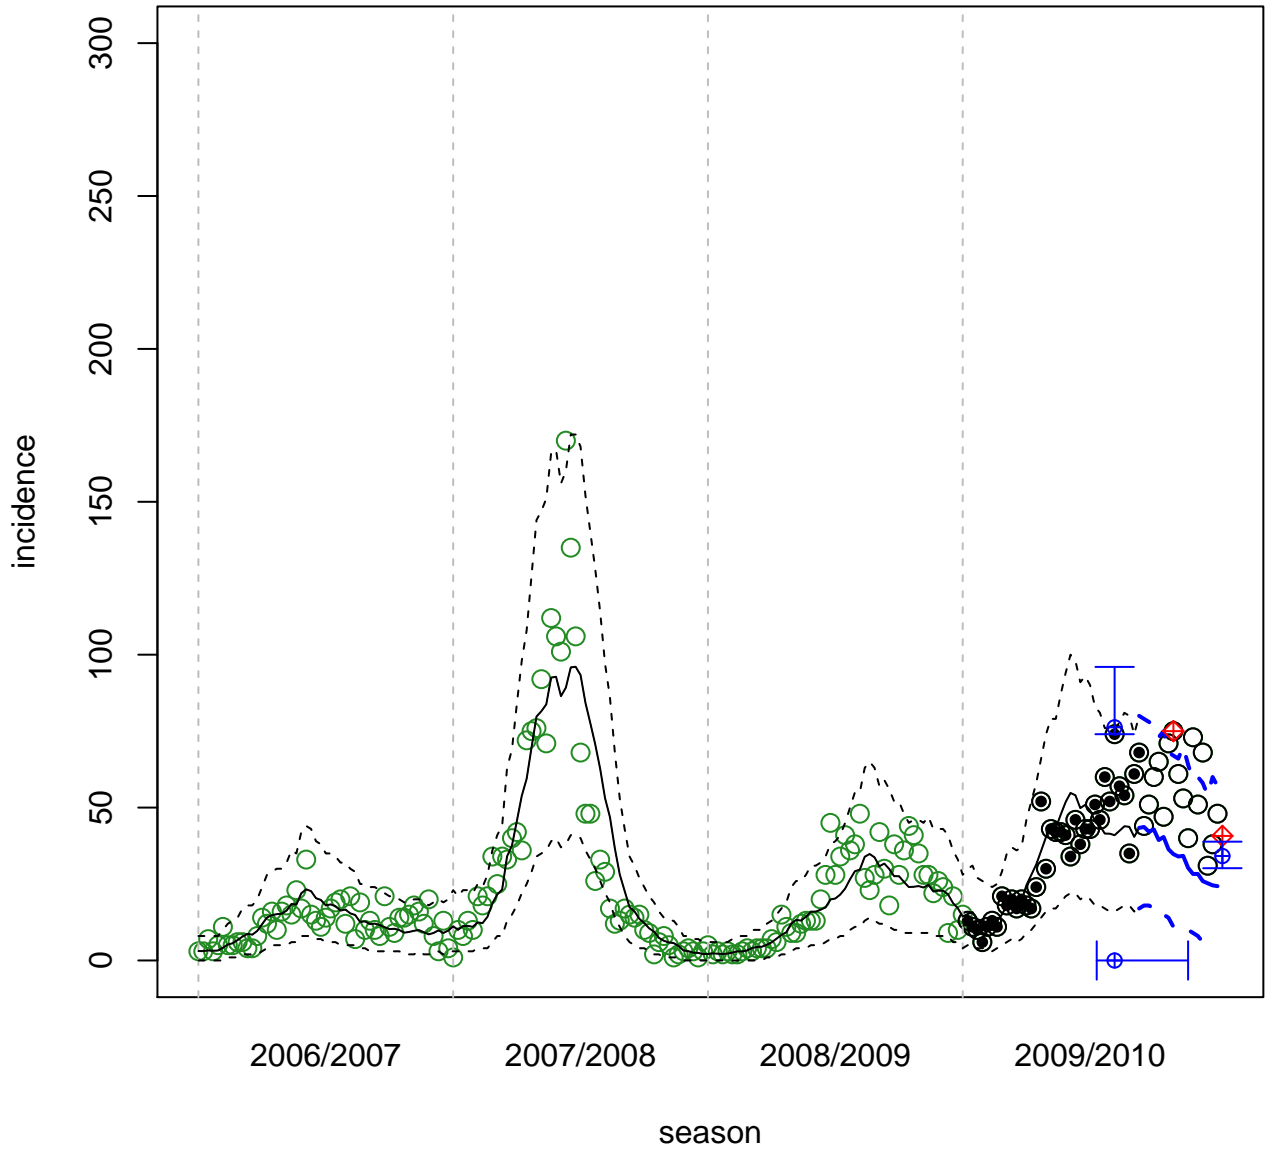

# sanjuan incidence

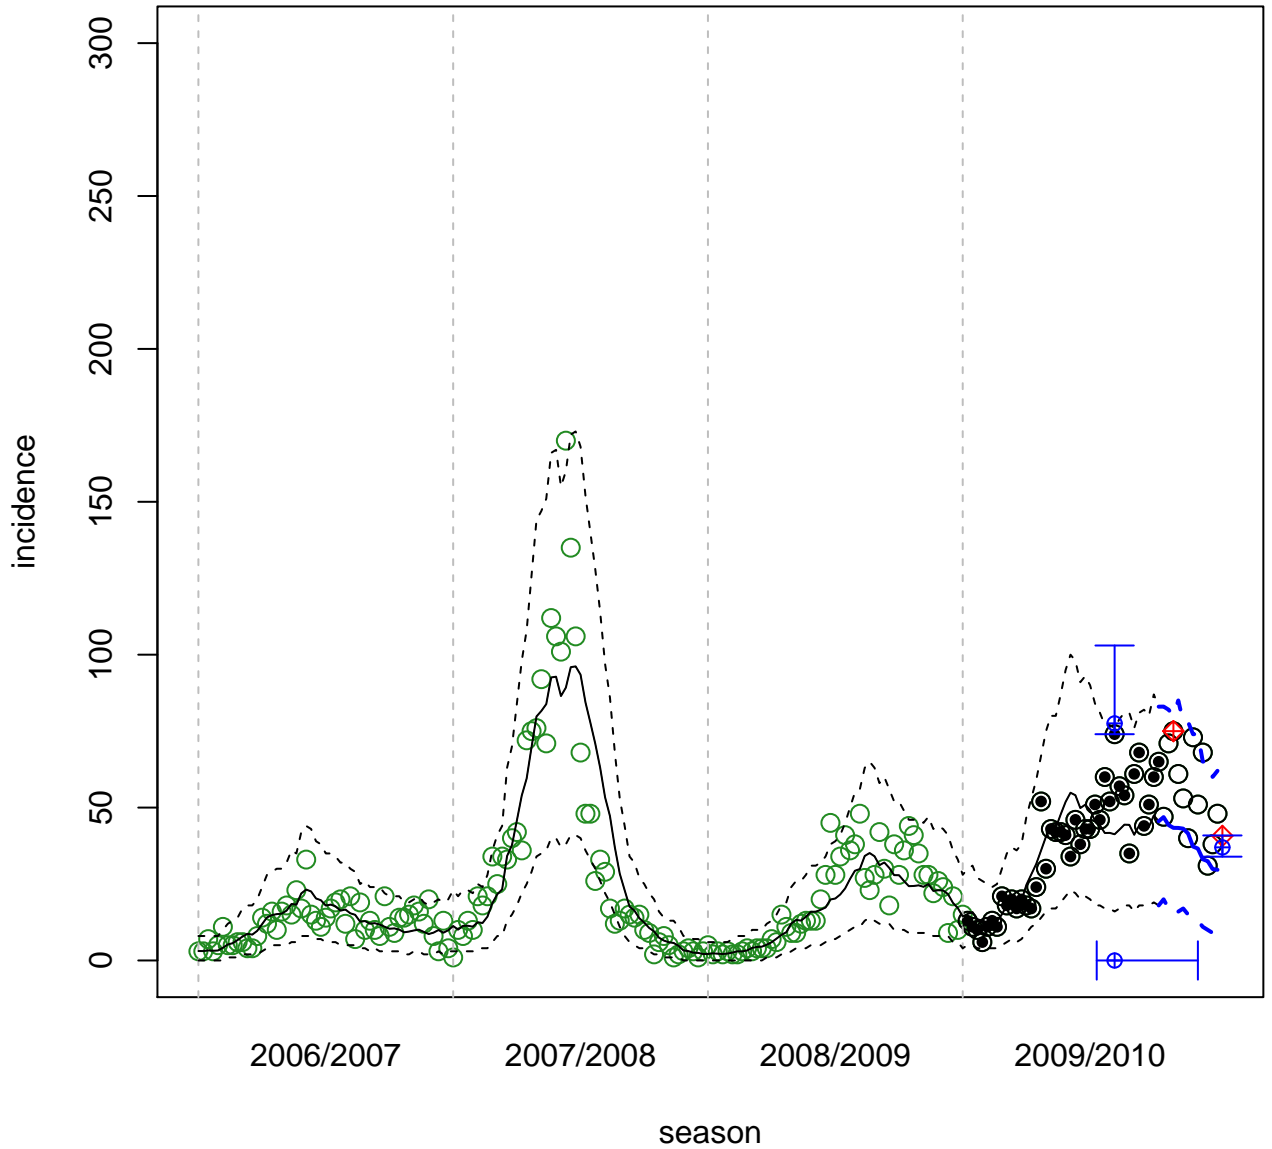

# sanjuan incidence

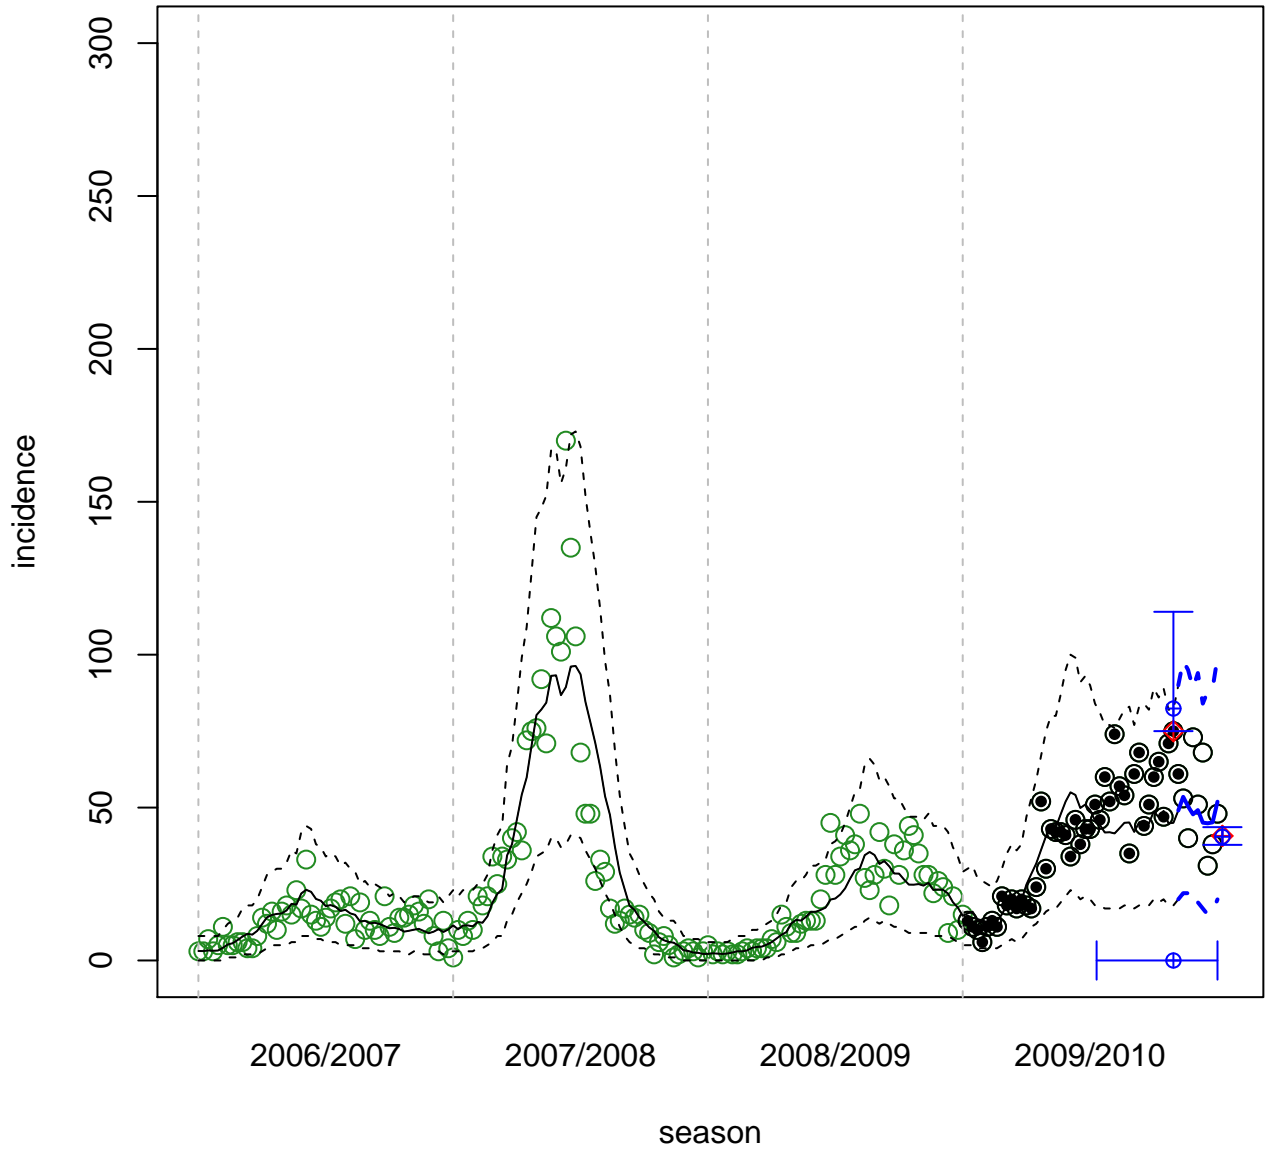



# sanjuan incidence

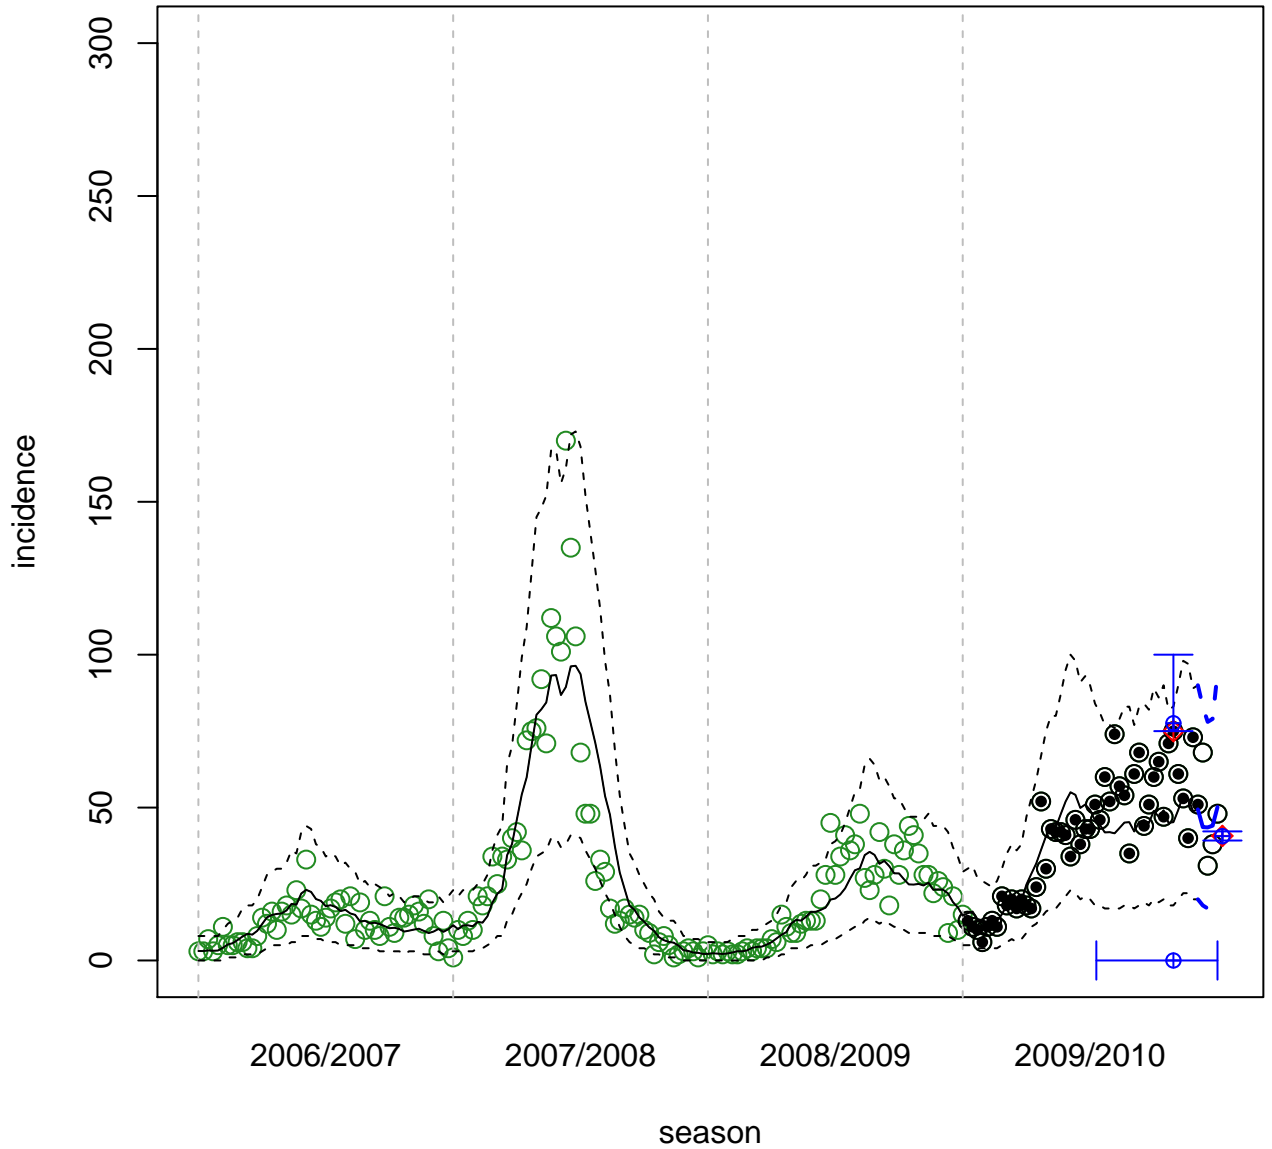

# sanjuan incidence

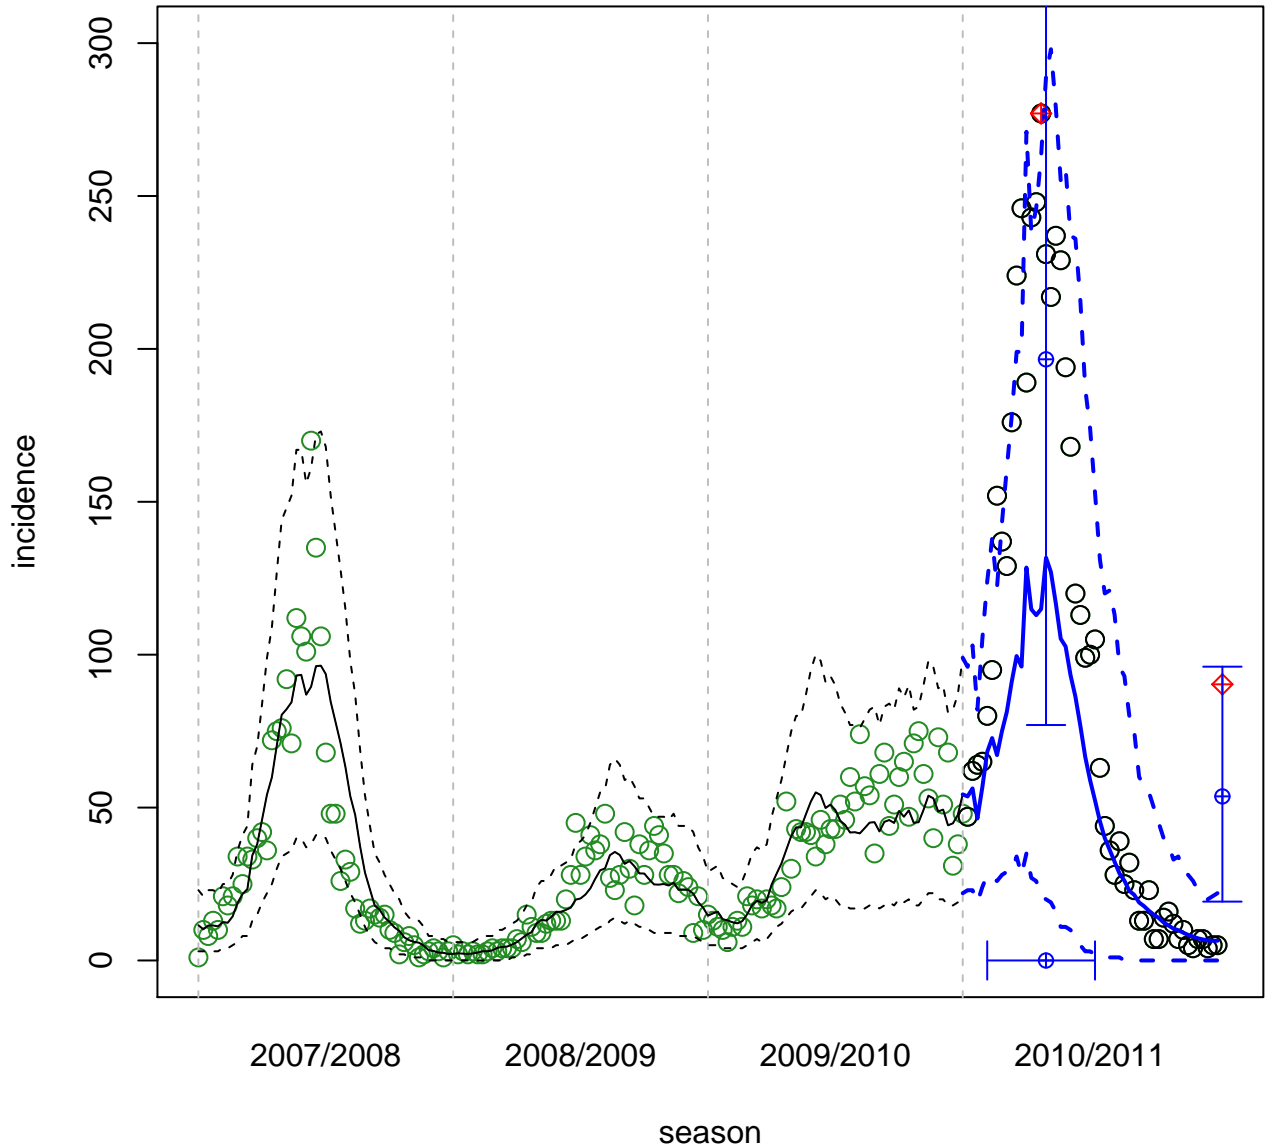

# sanjuan incidence

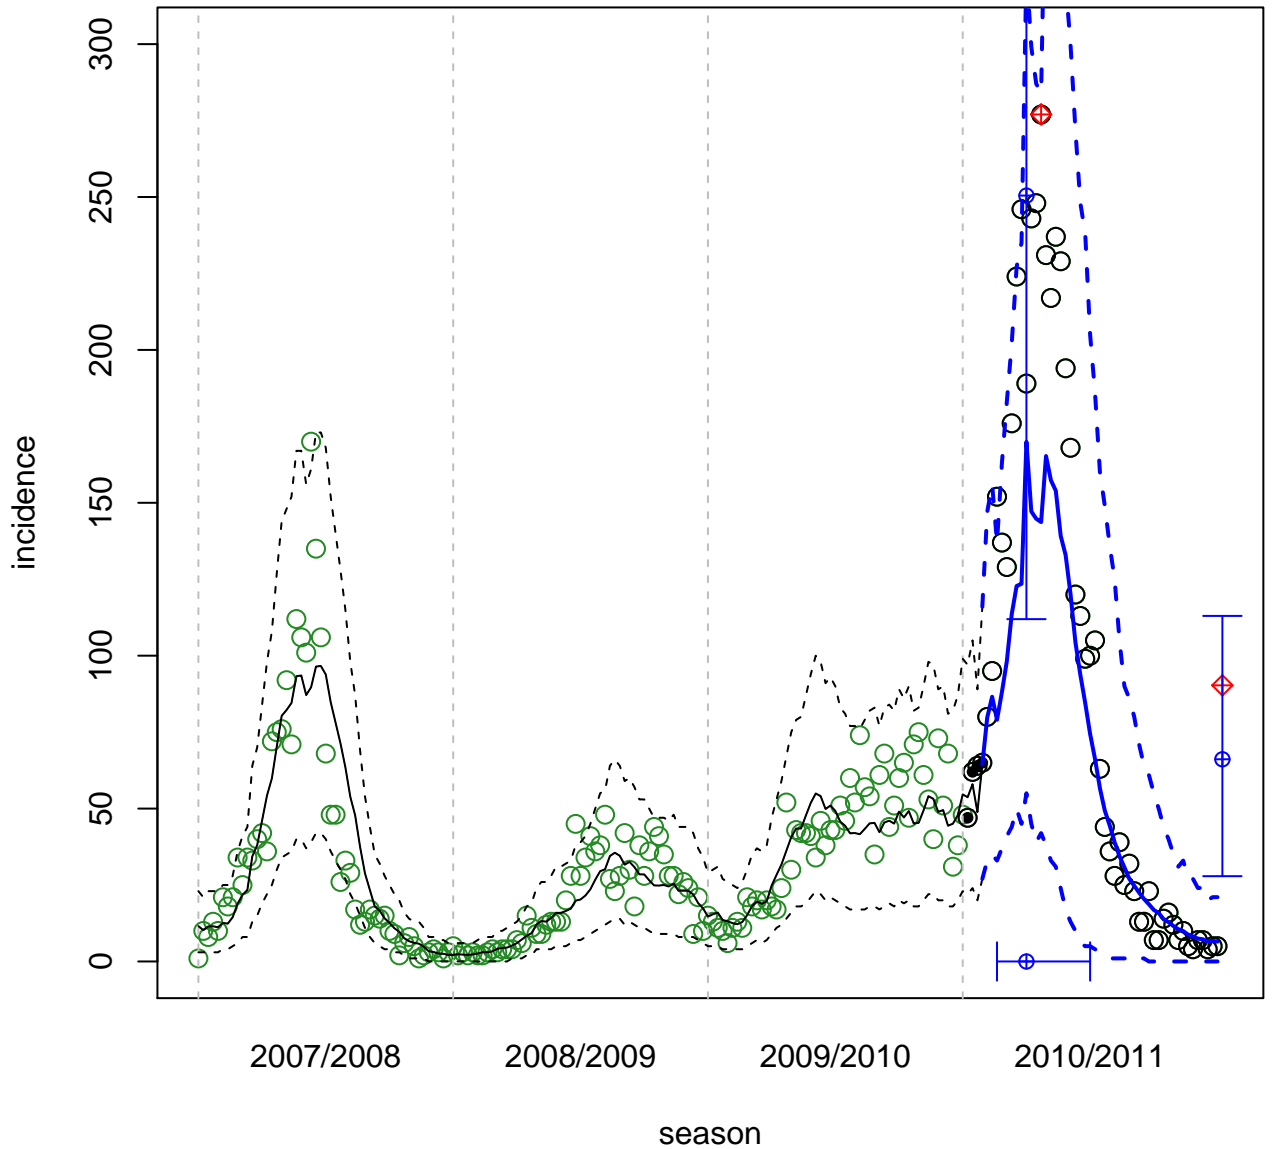

# sanjuan incidence

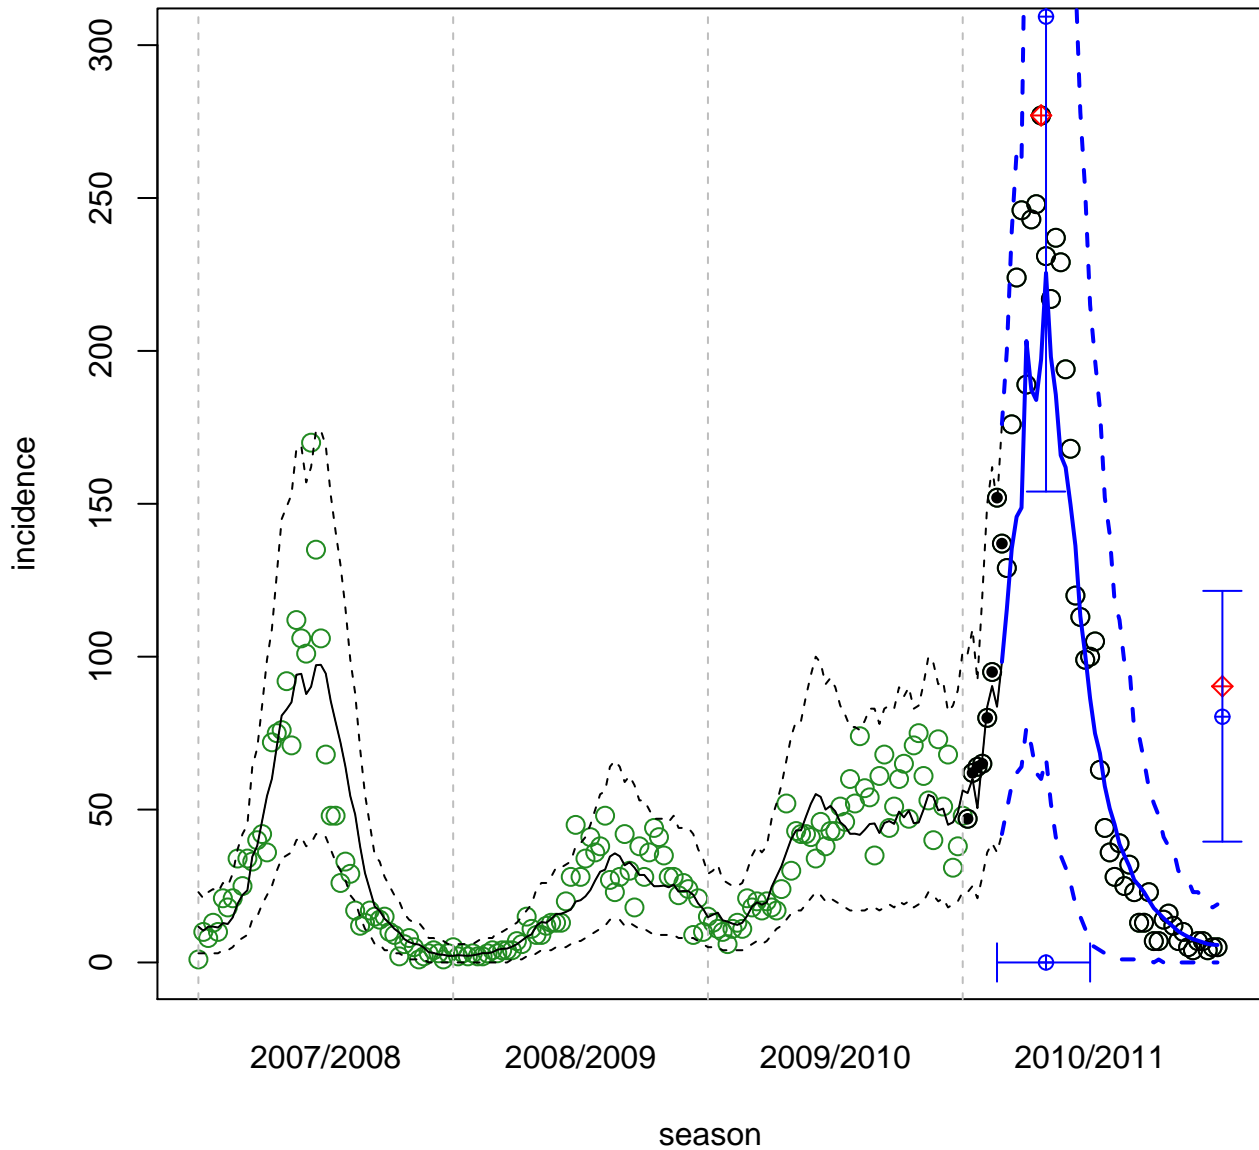

# sanjuan incidence

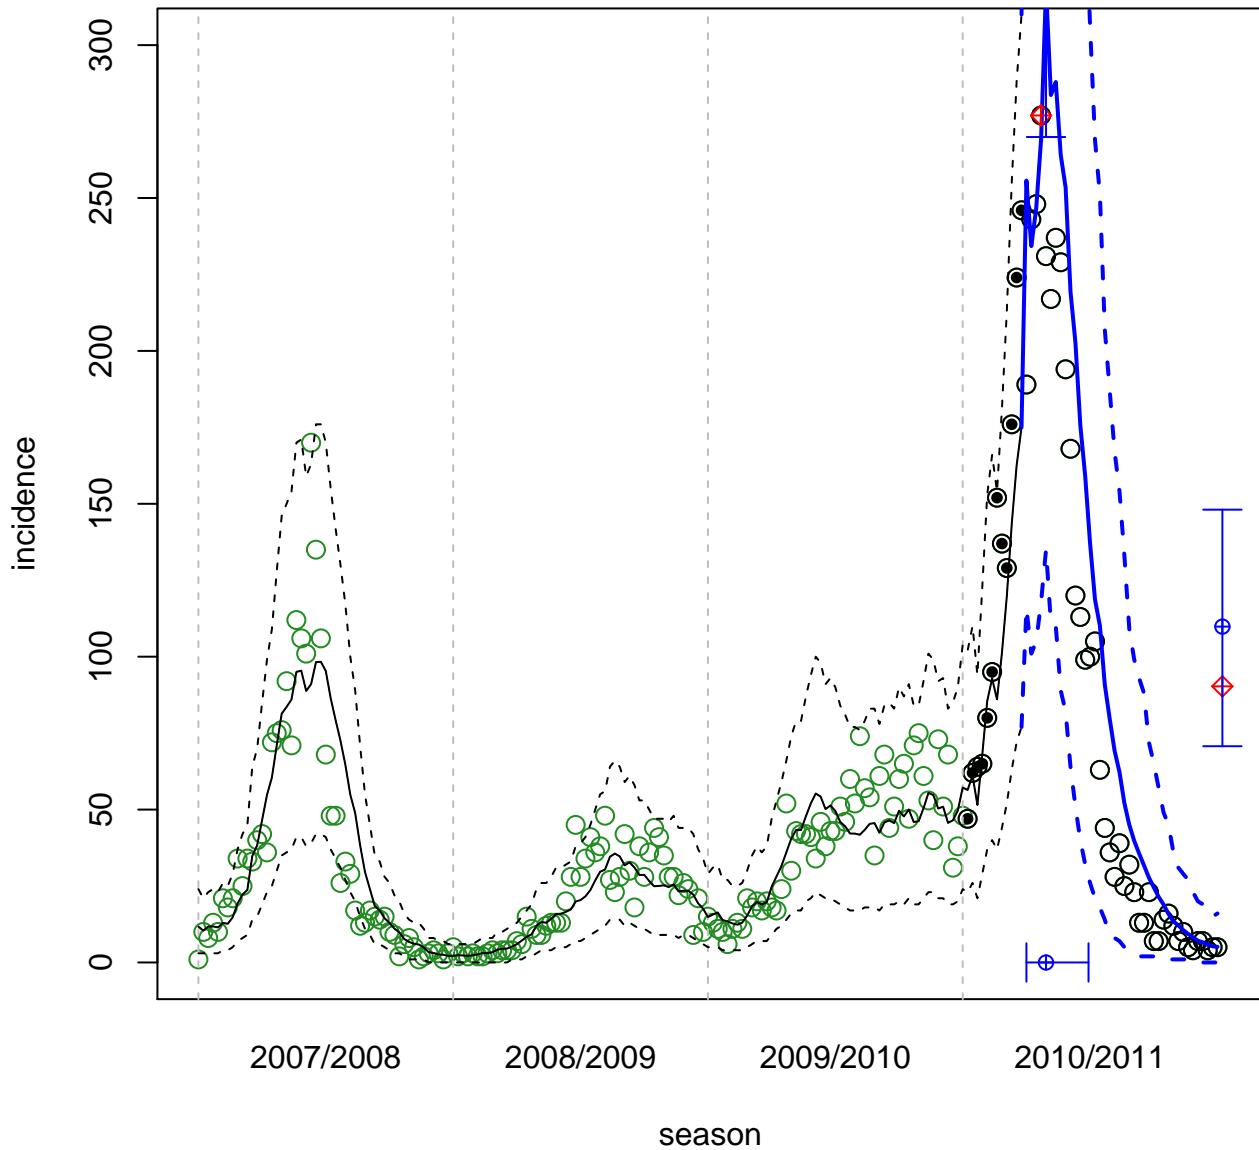

# sanjuan incidence

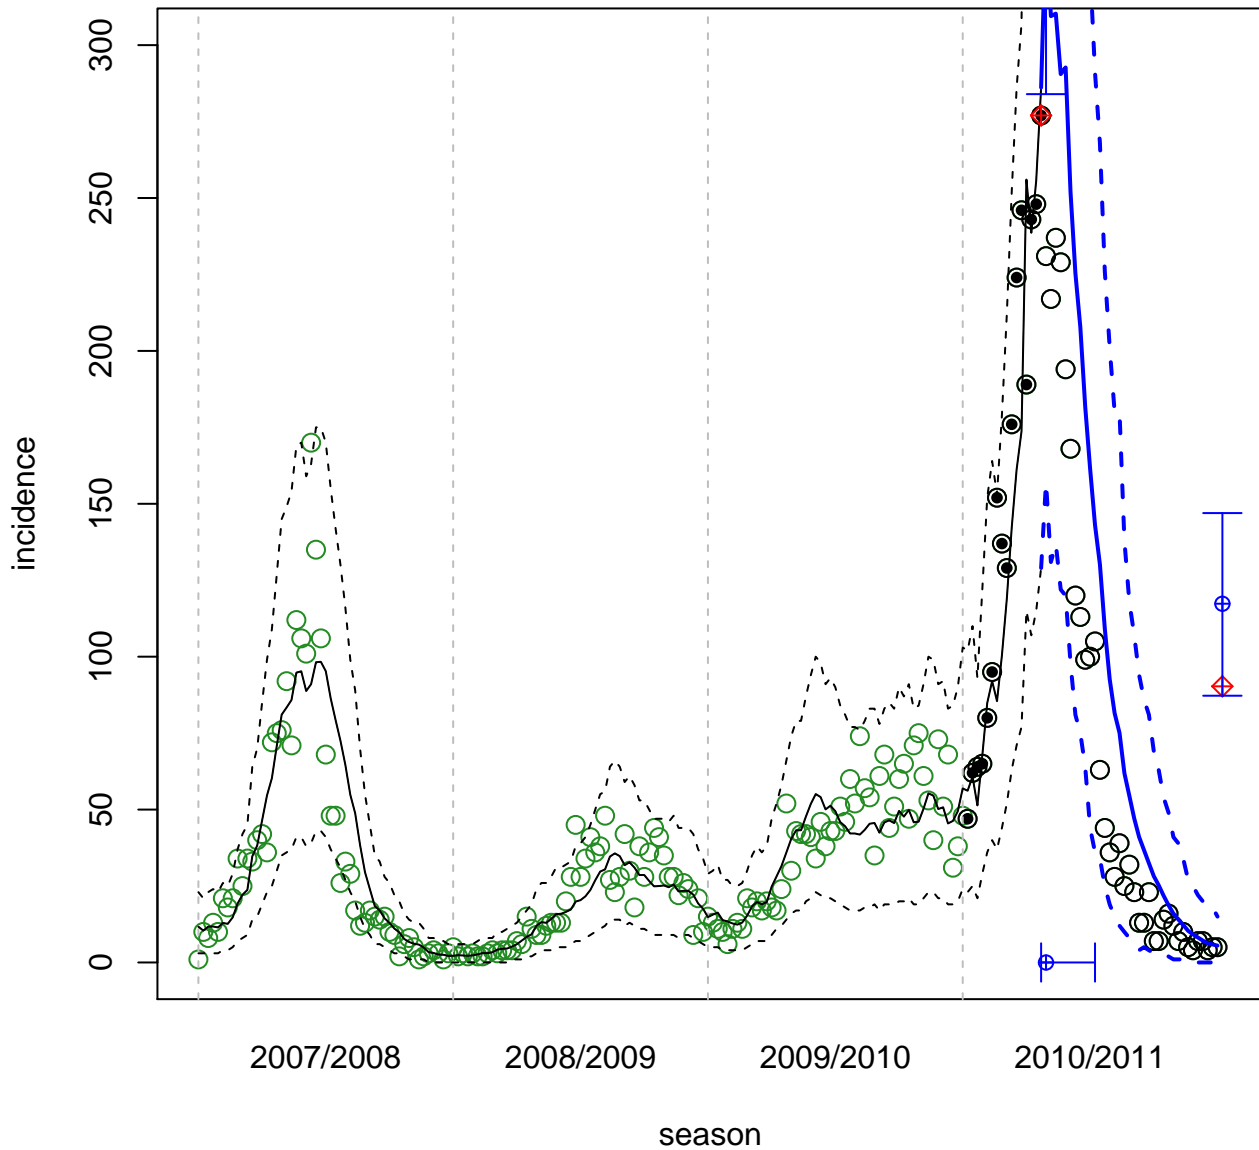

# sanjuan incidence

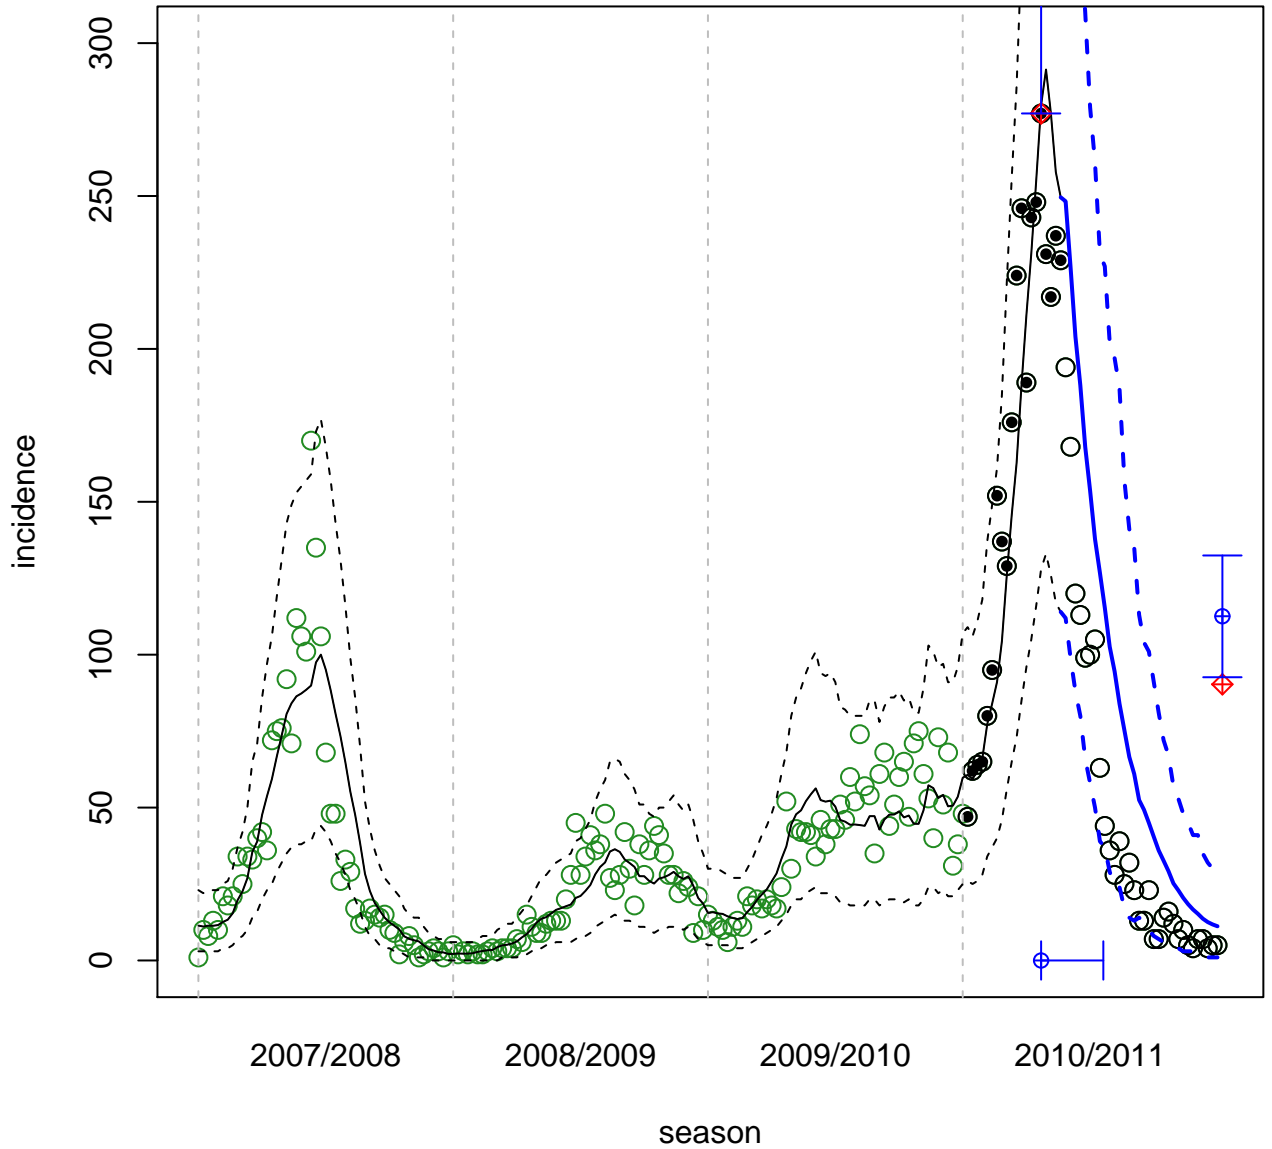

# sanjuan incidence

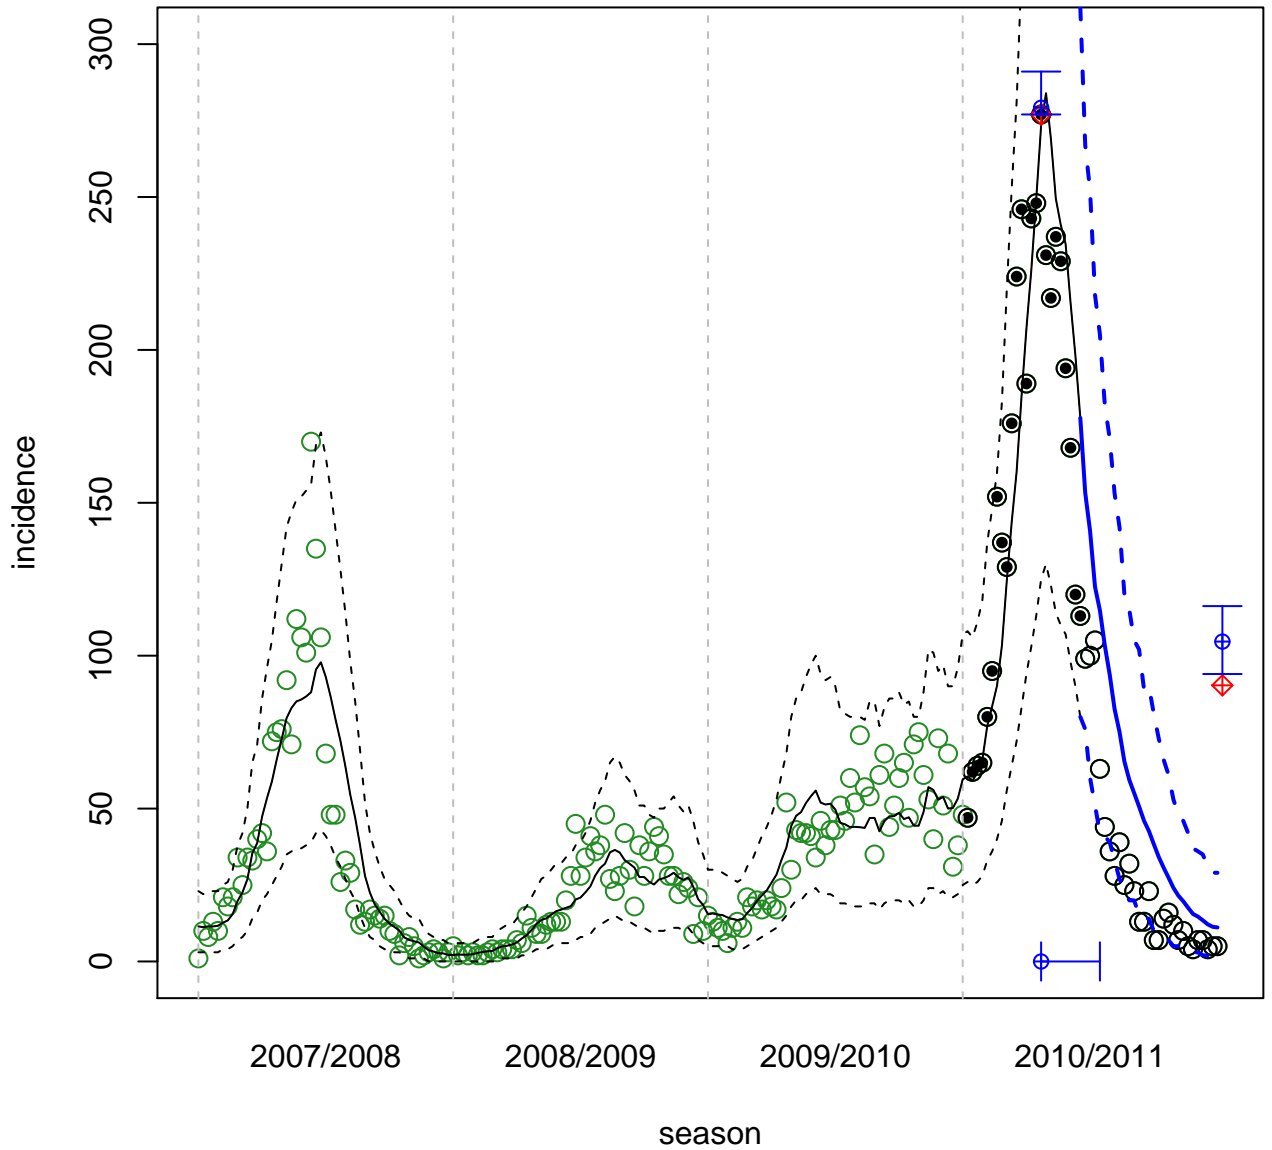



# sanjuan incidence

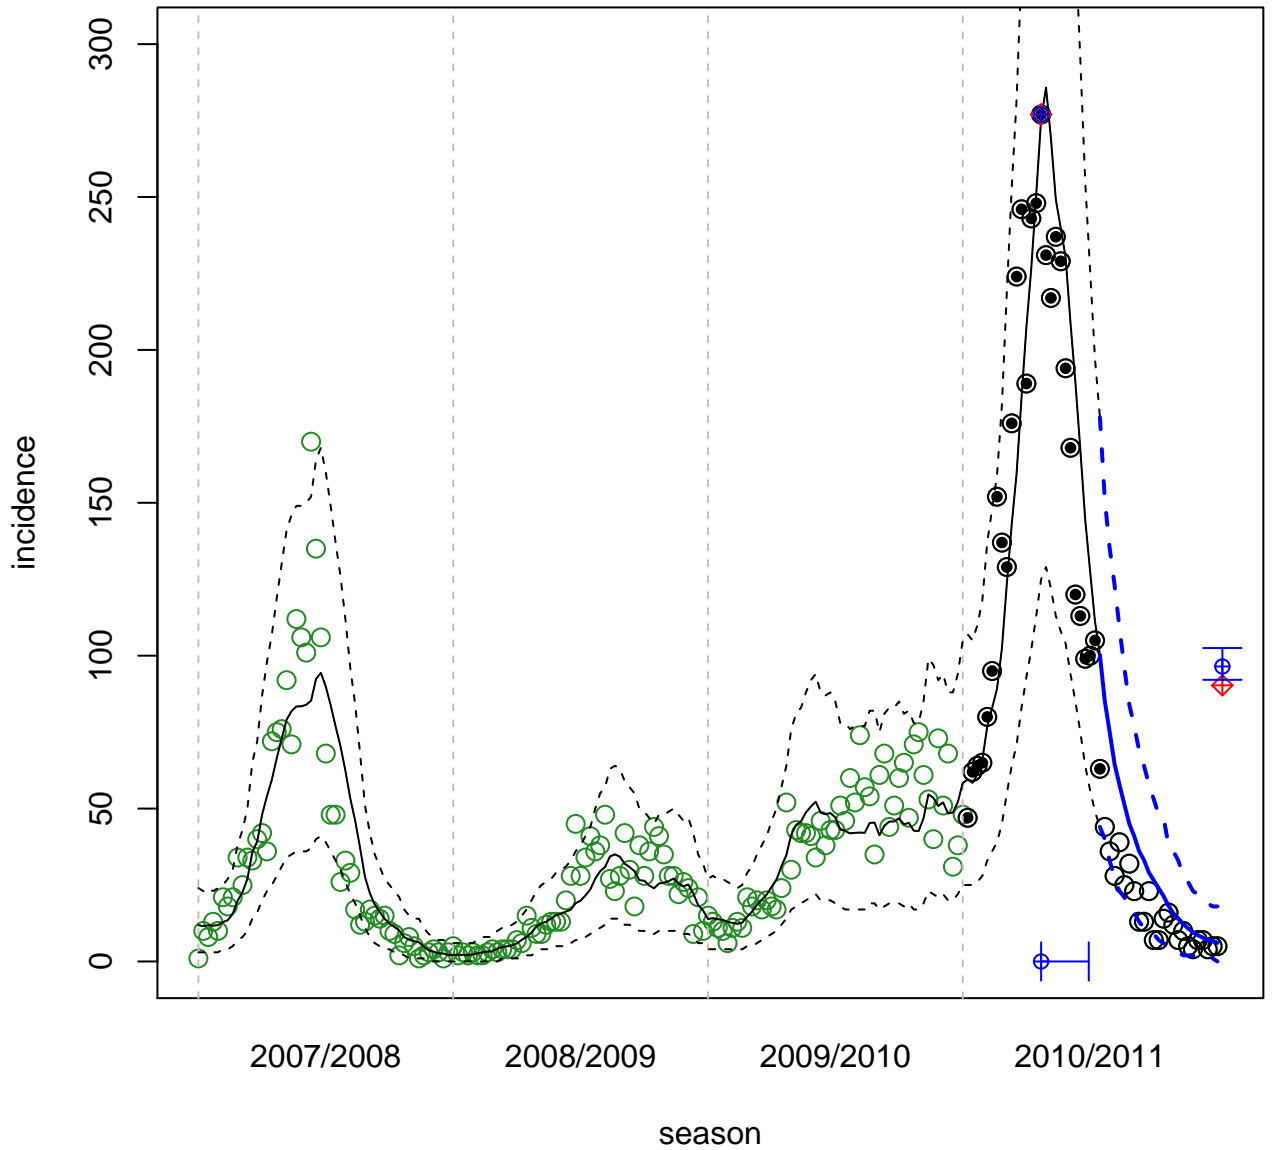

# sanjuan incidence

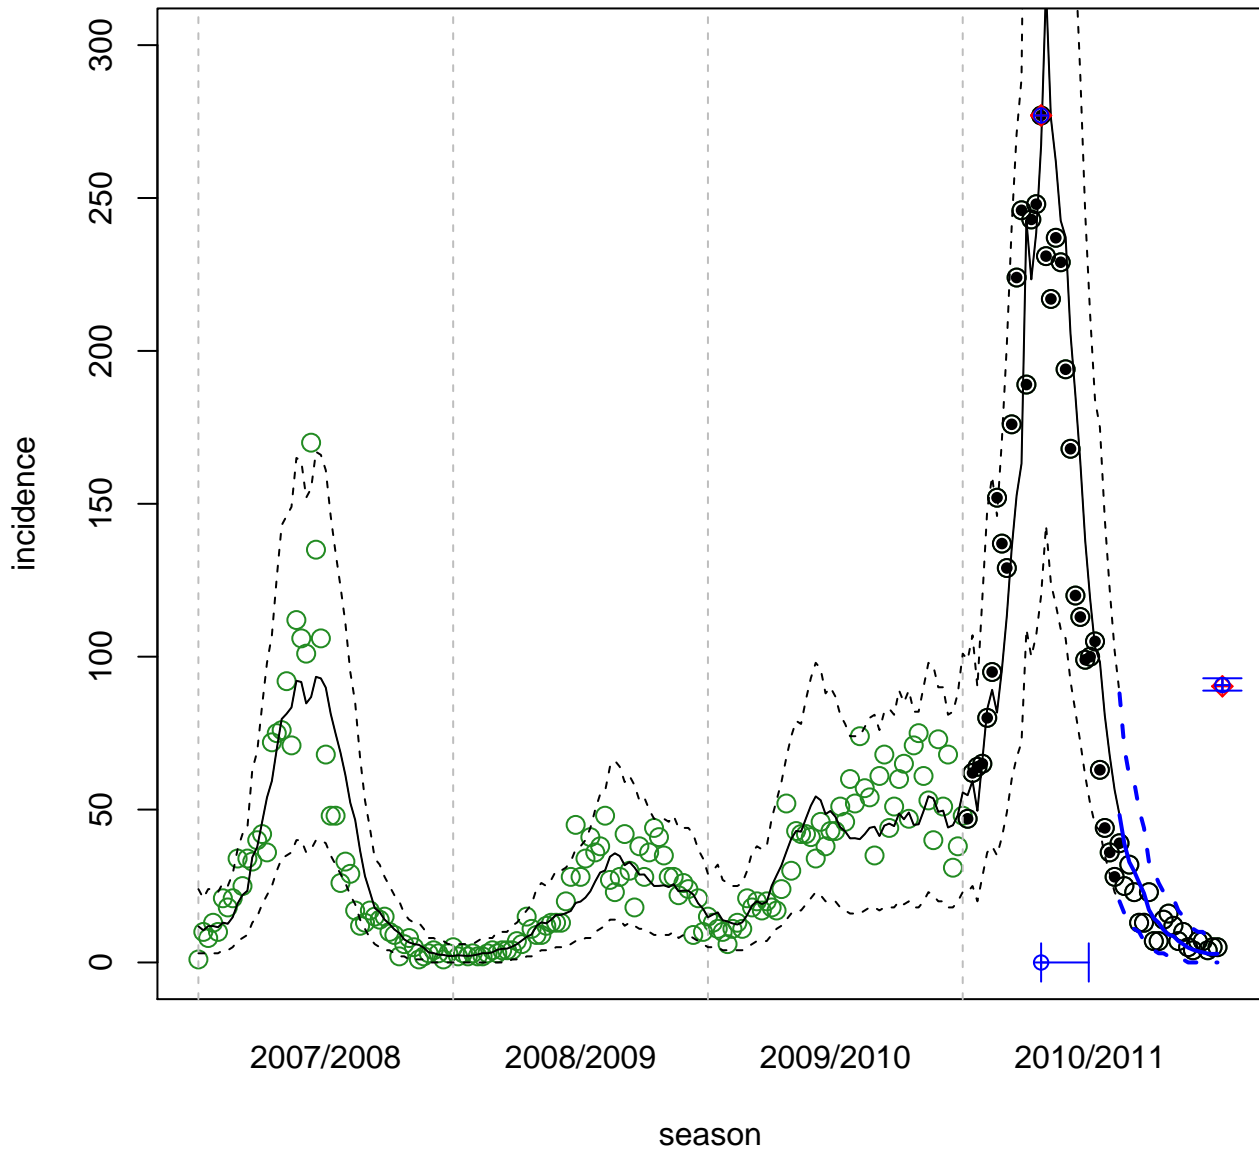

# sanjuan incidence

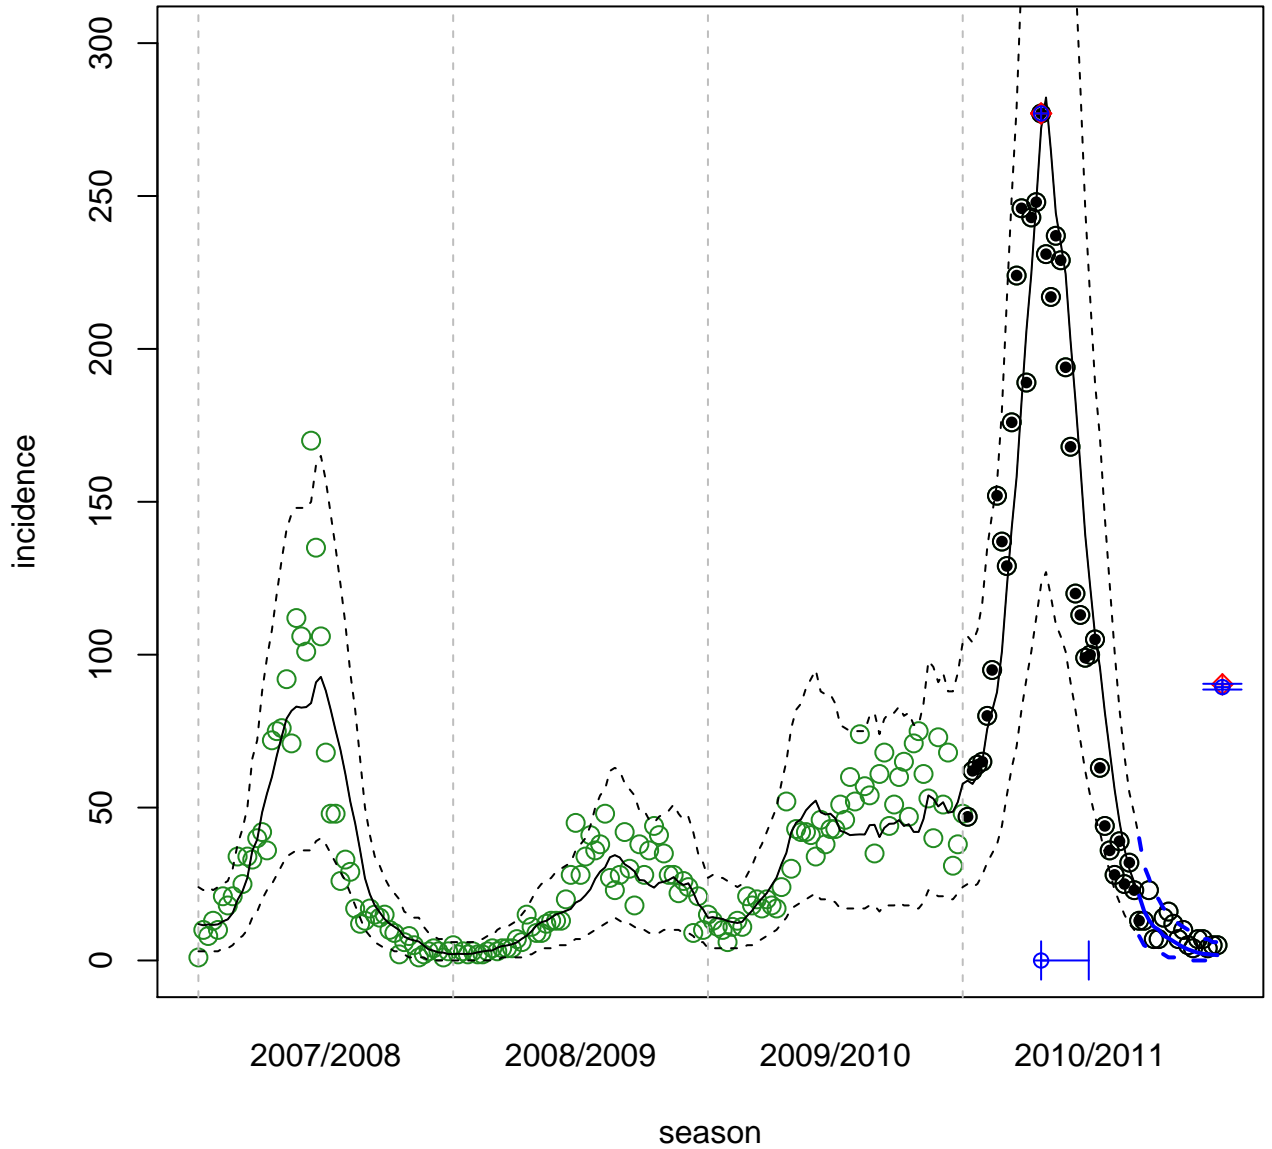

# sanjuan incidence

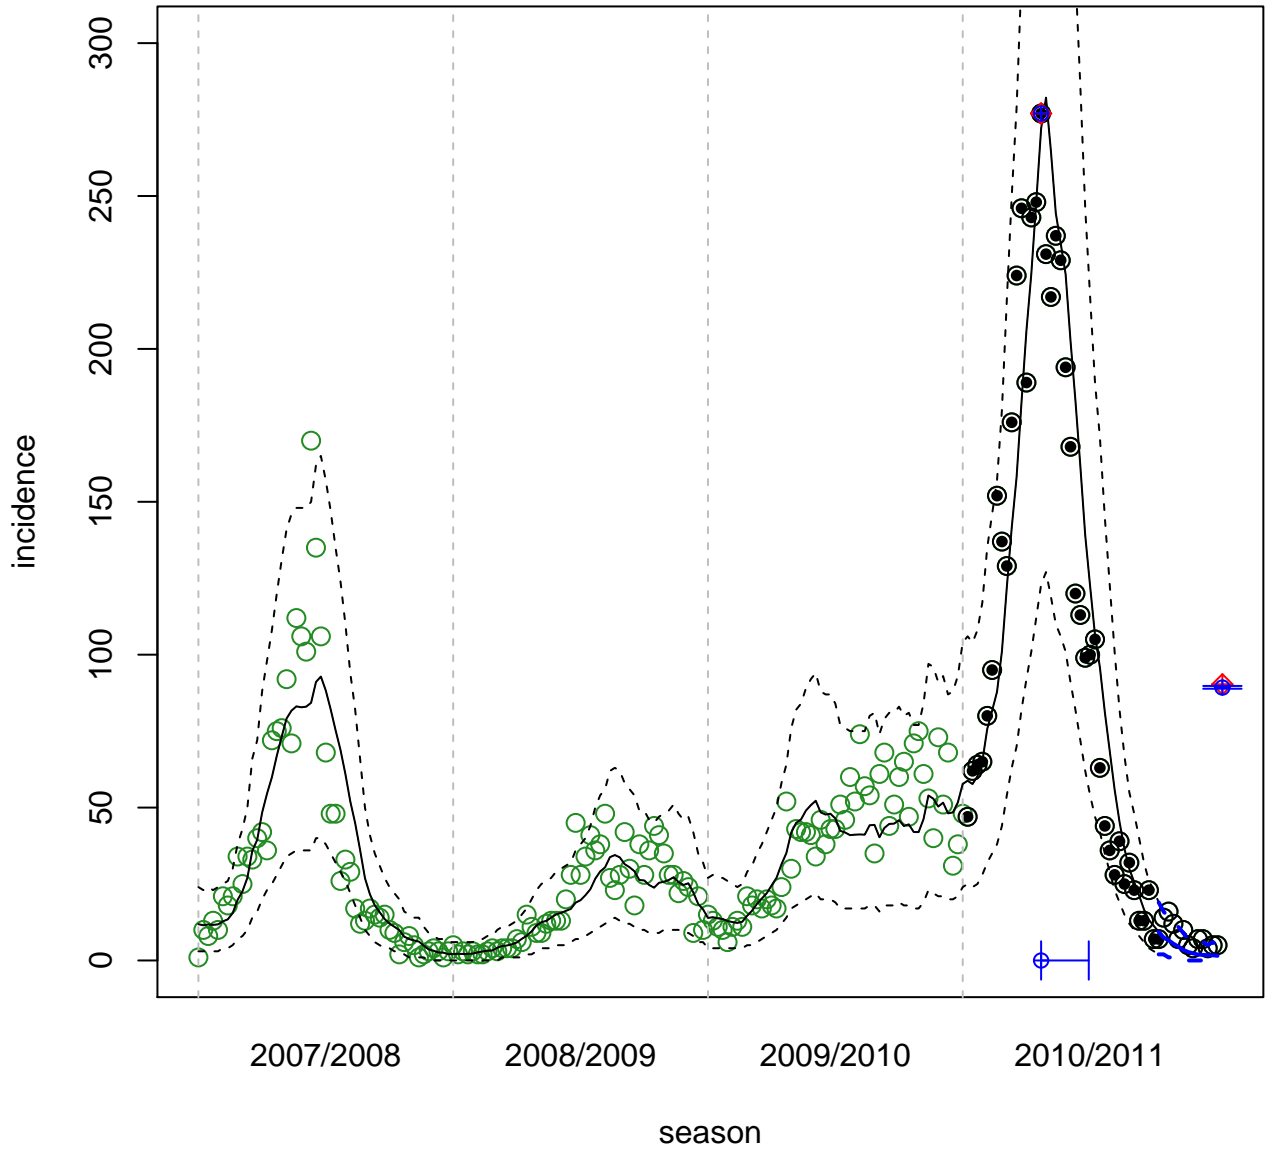

# sanjuan incidence

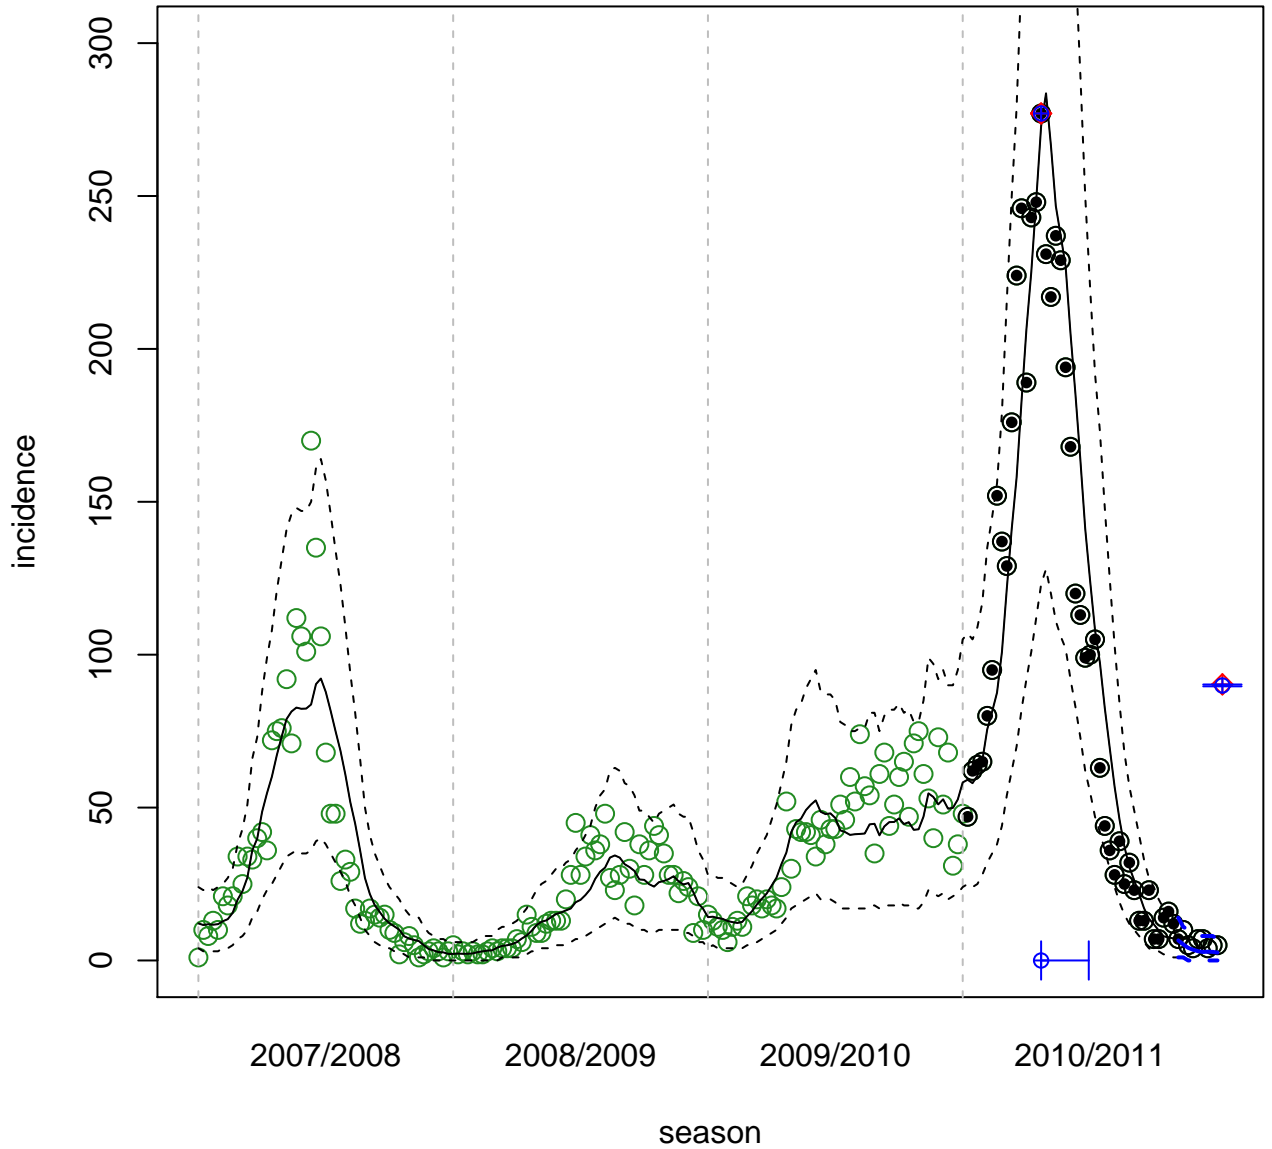



# sanjuan incidence

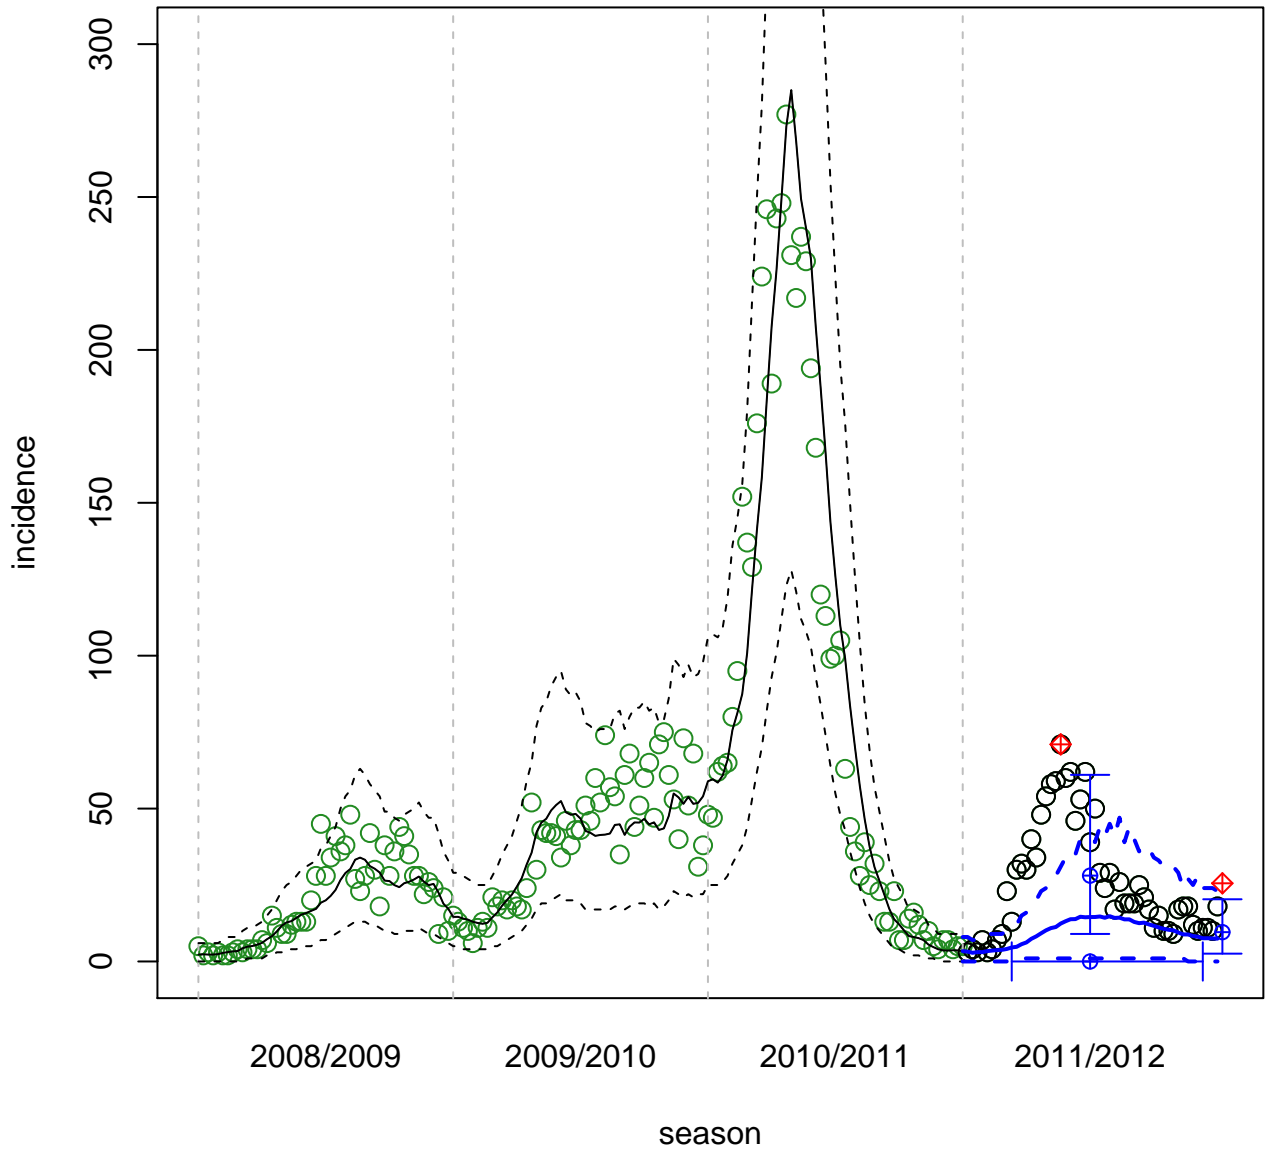

# sanjuan incidence

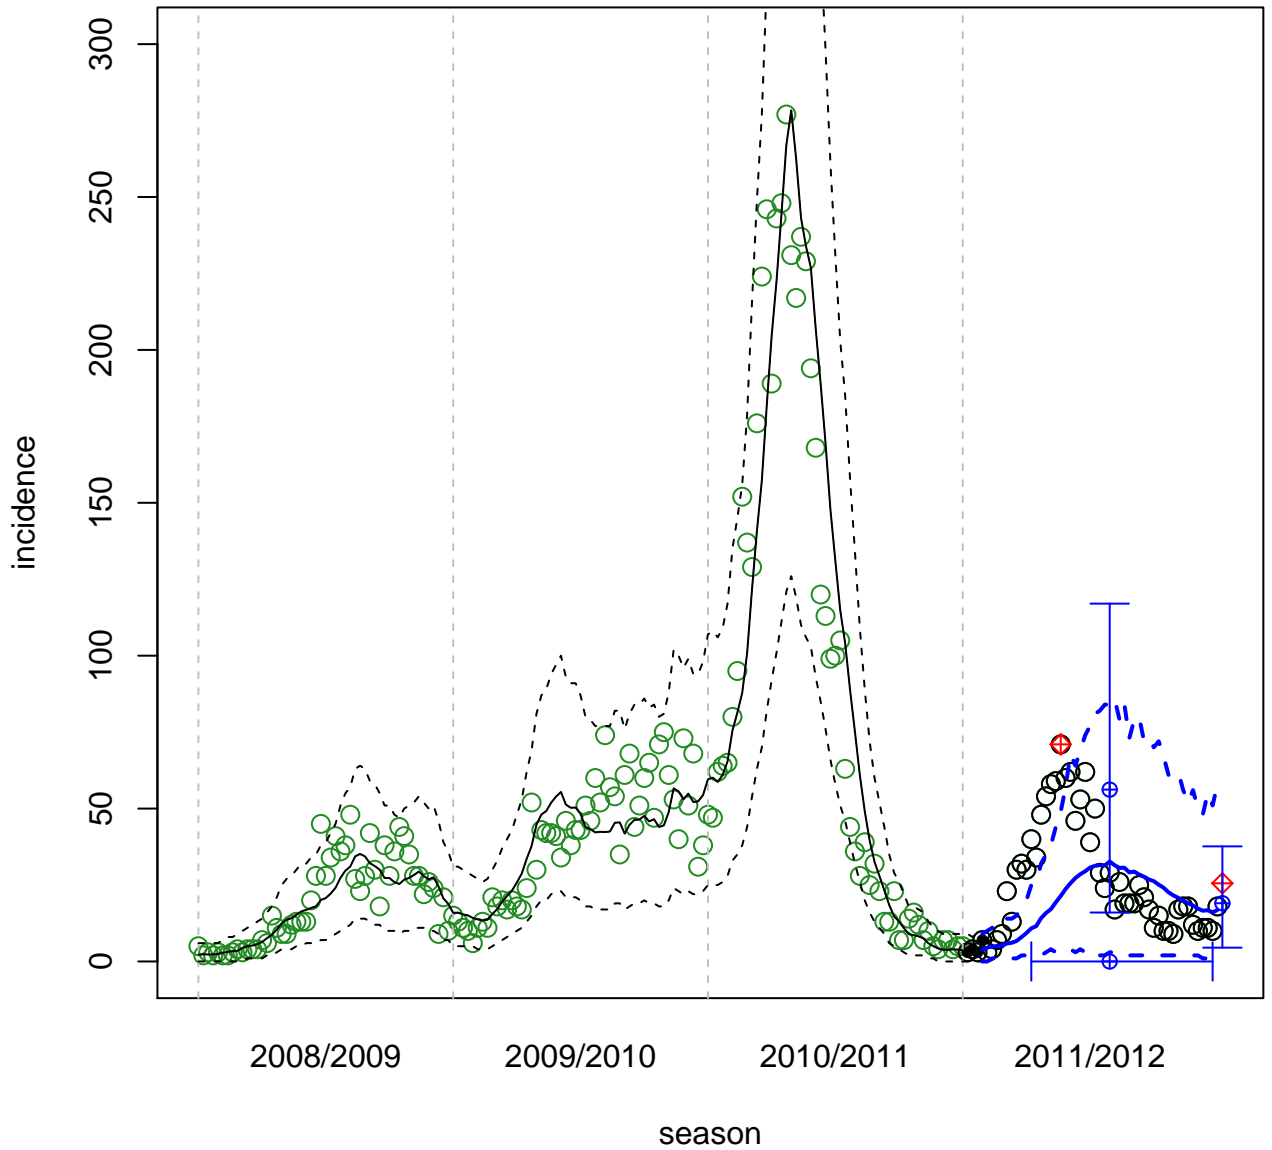



# sanjuan incidence

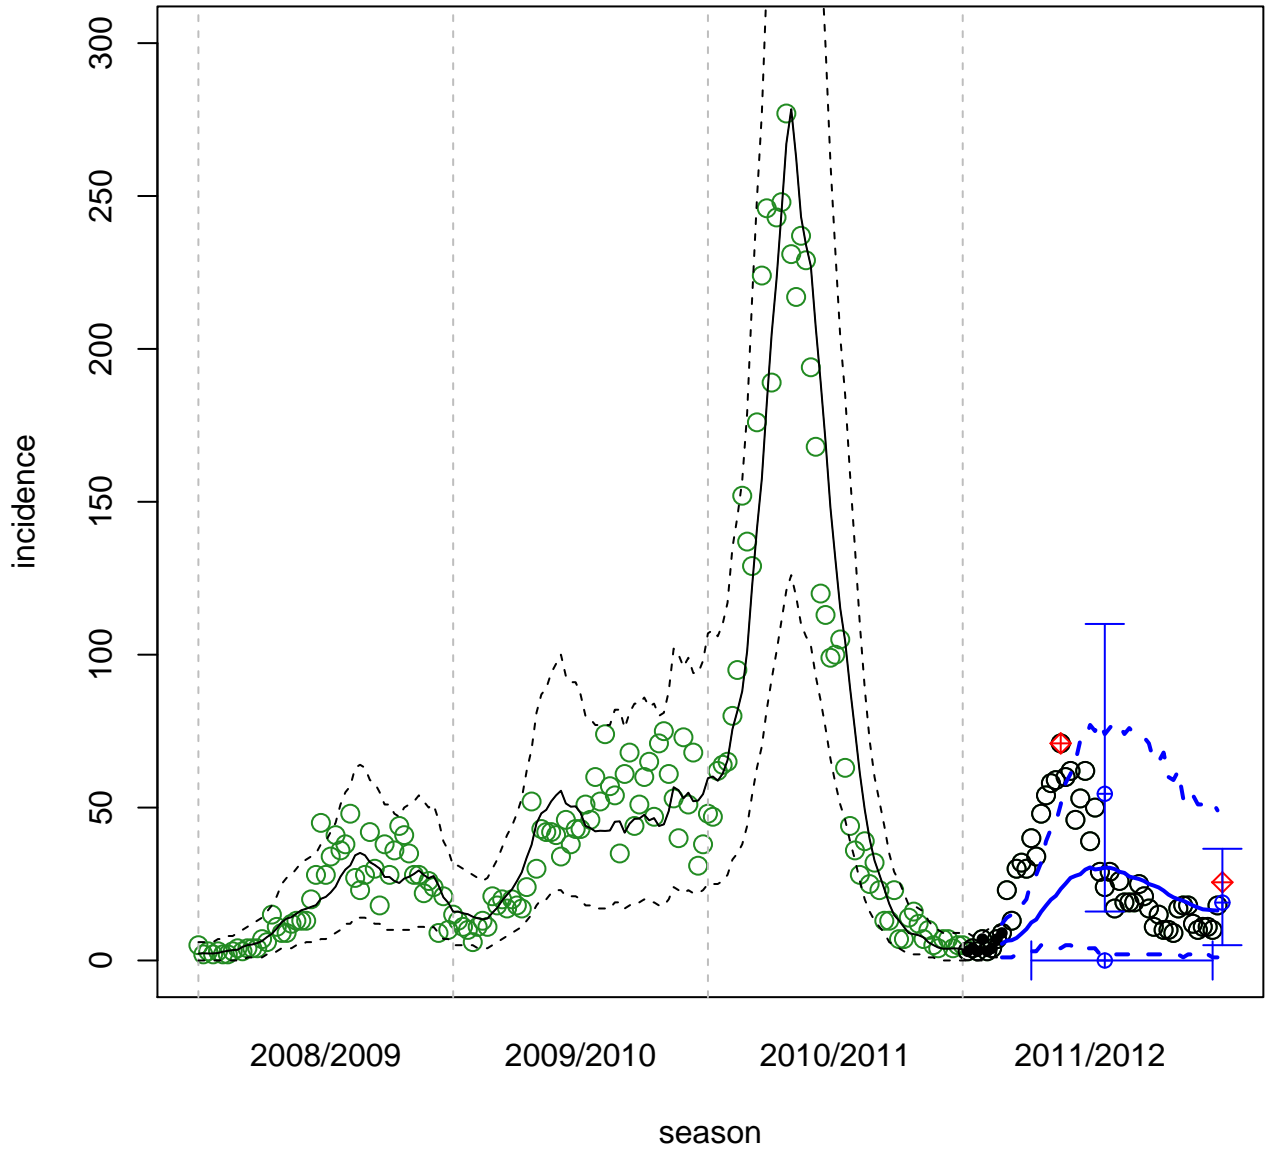

# sanjuan incidence

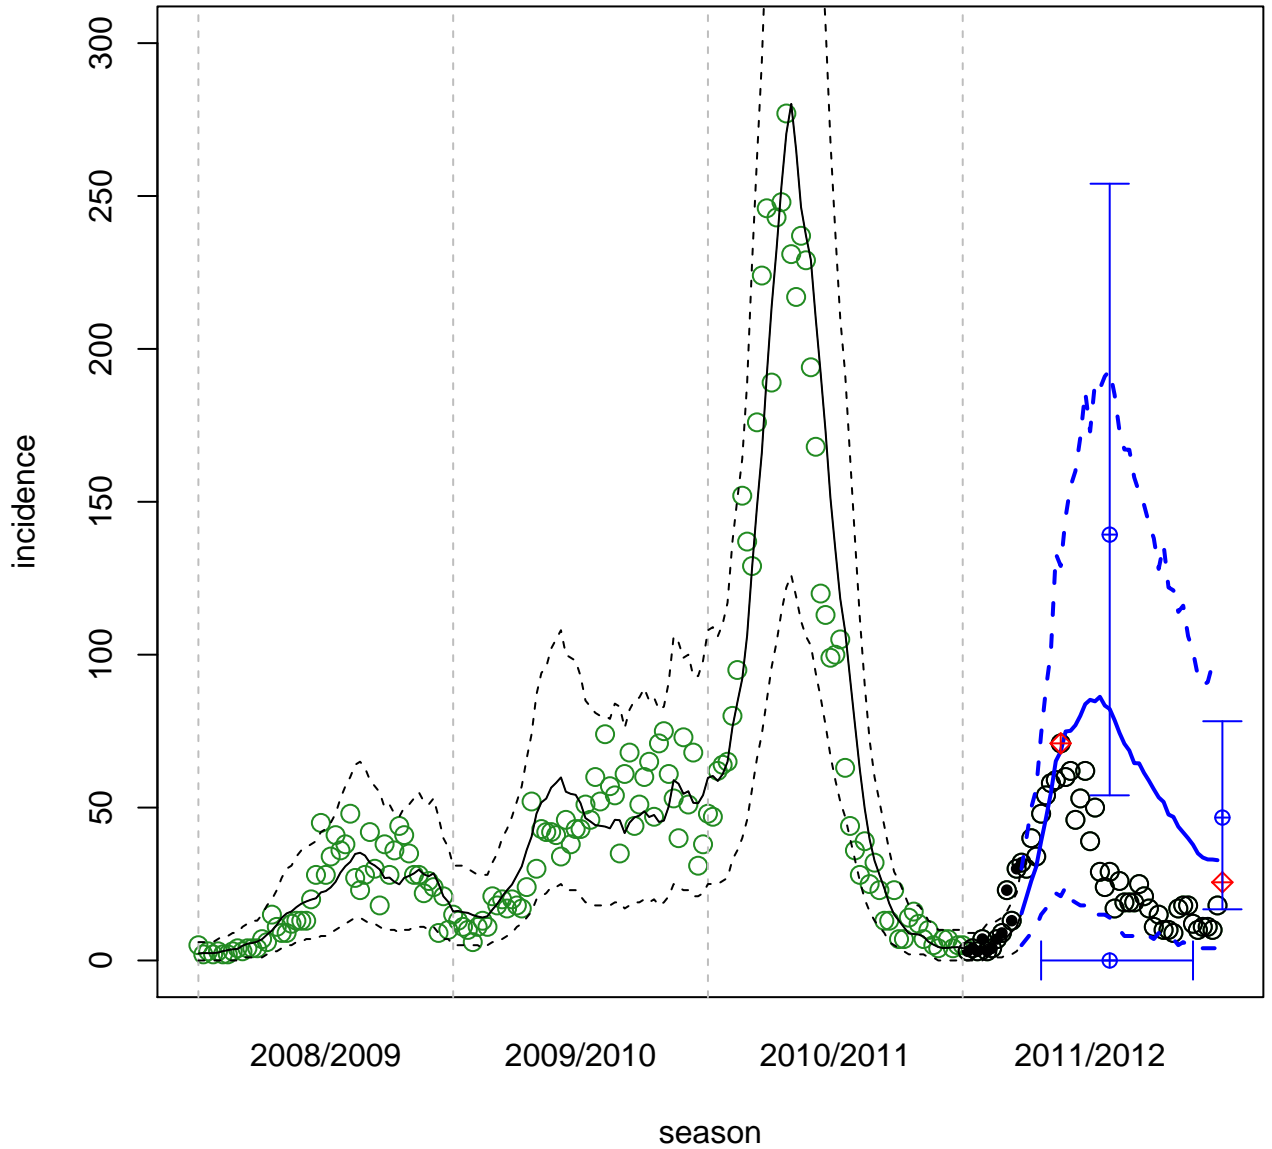

# sanjuan incidence

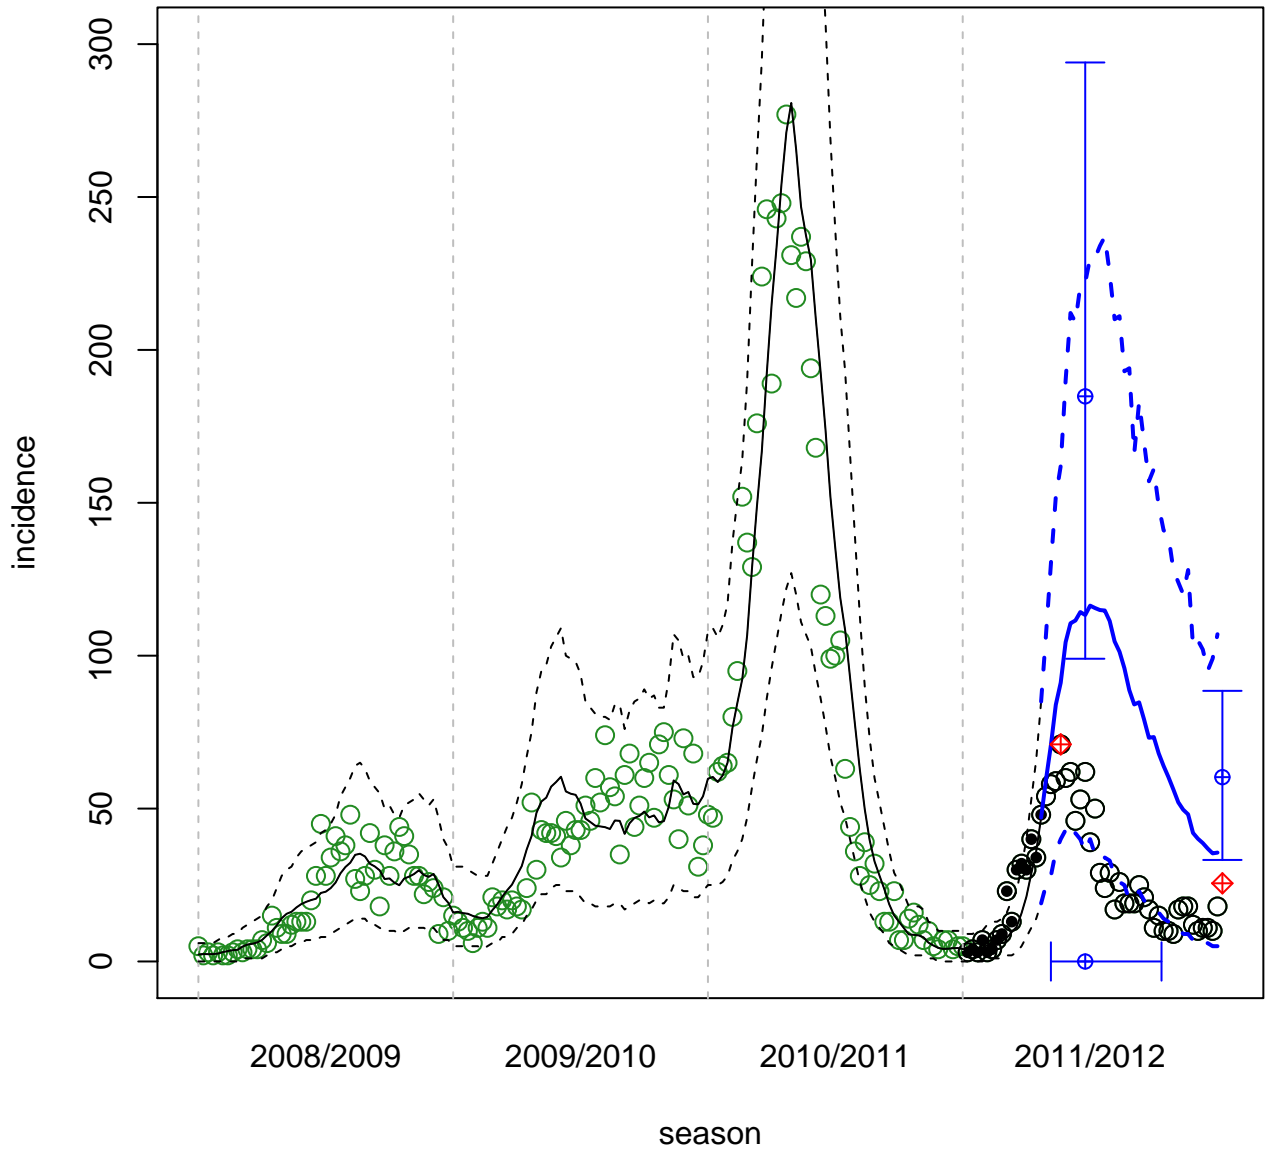

# sanjuan incidence

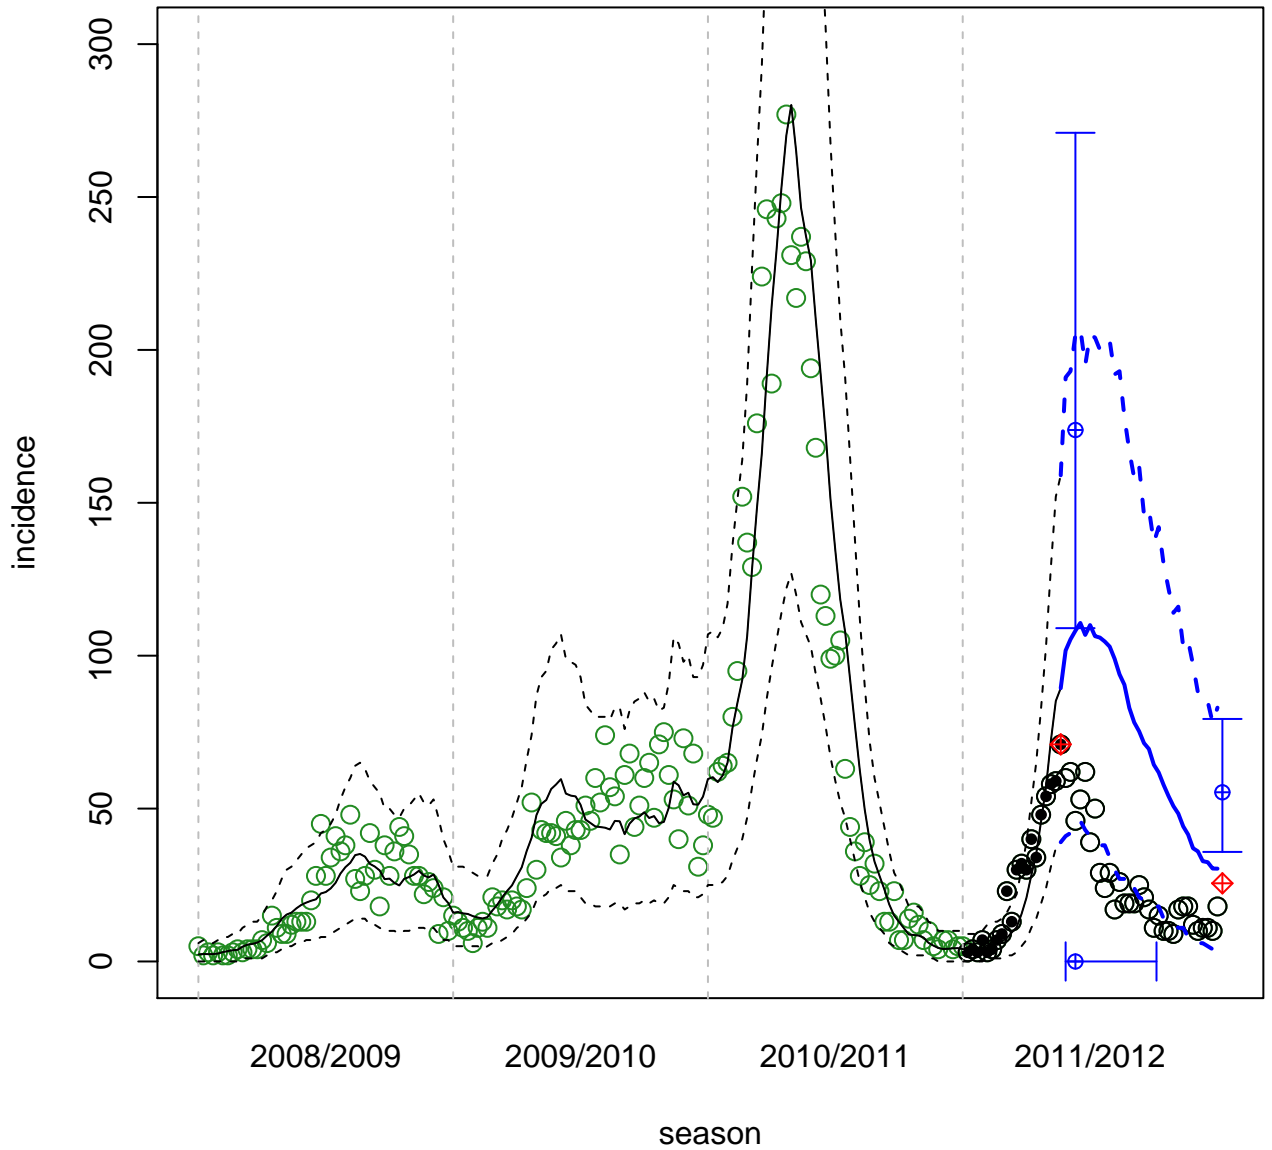

# sanjuan incidence

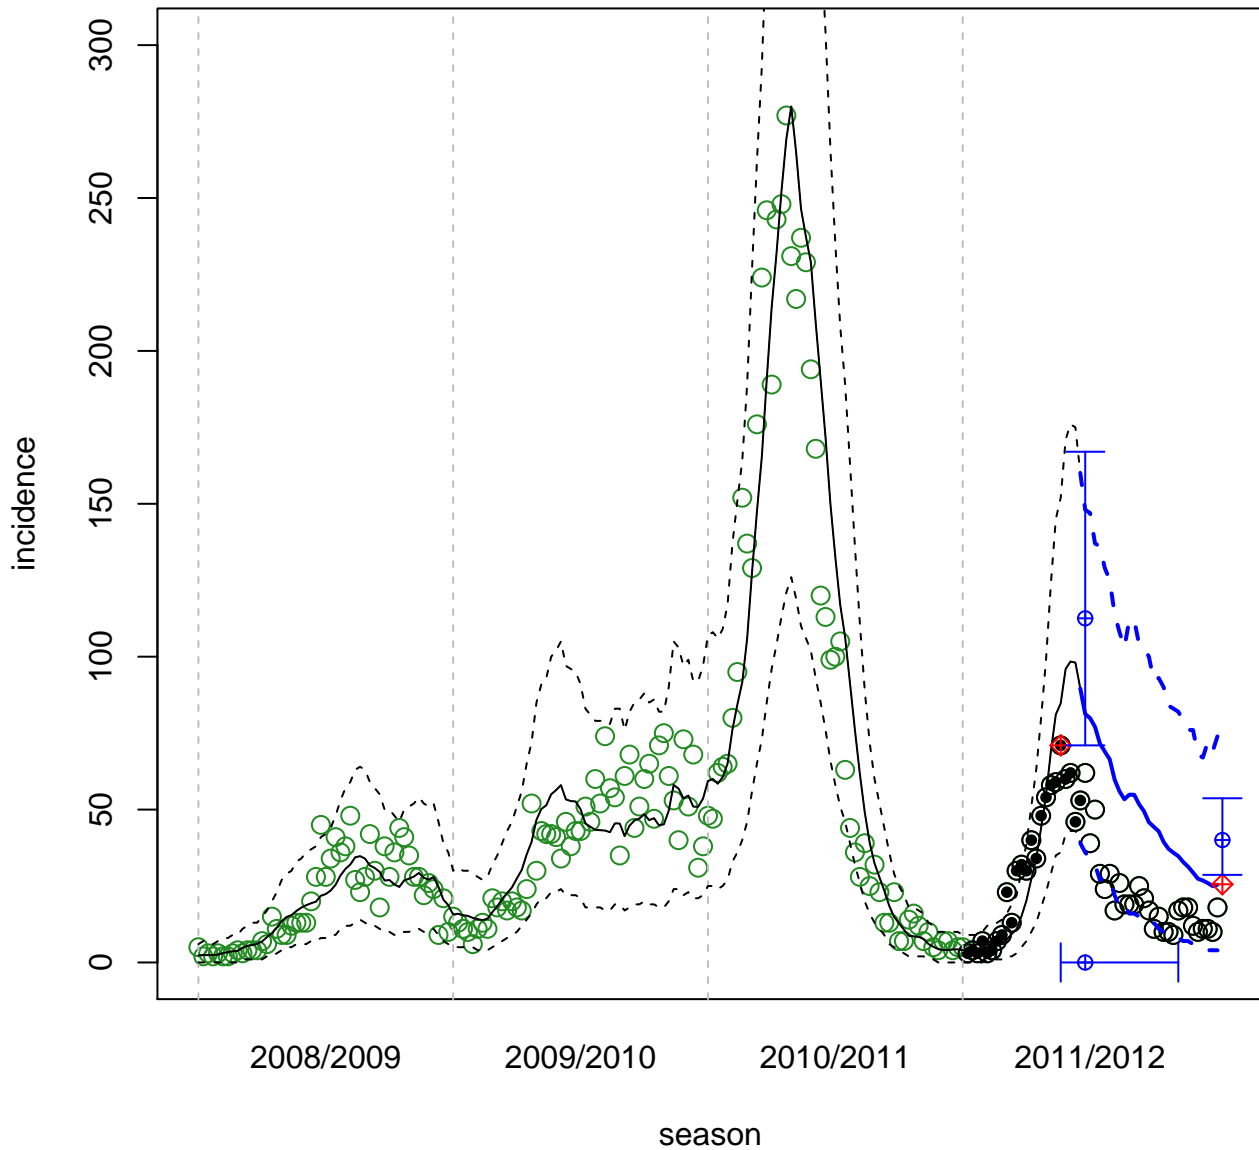

# sanjuan incidence

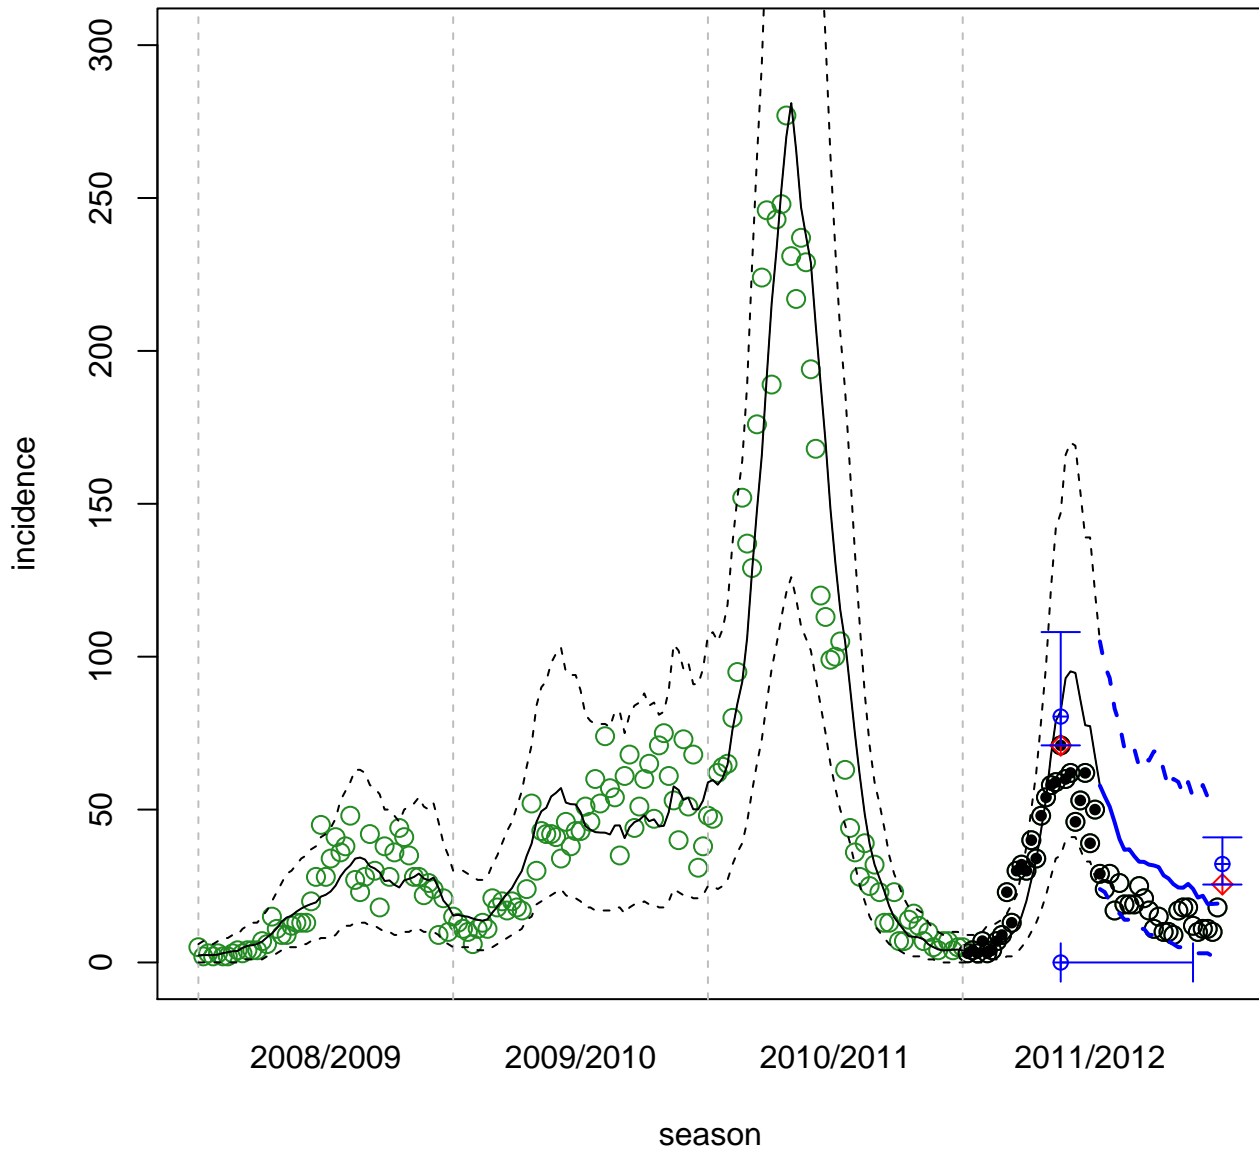

# sanjuan incidence

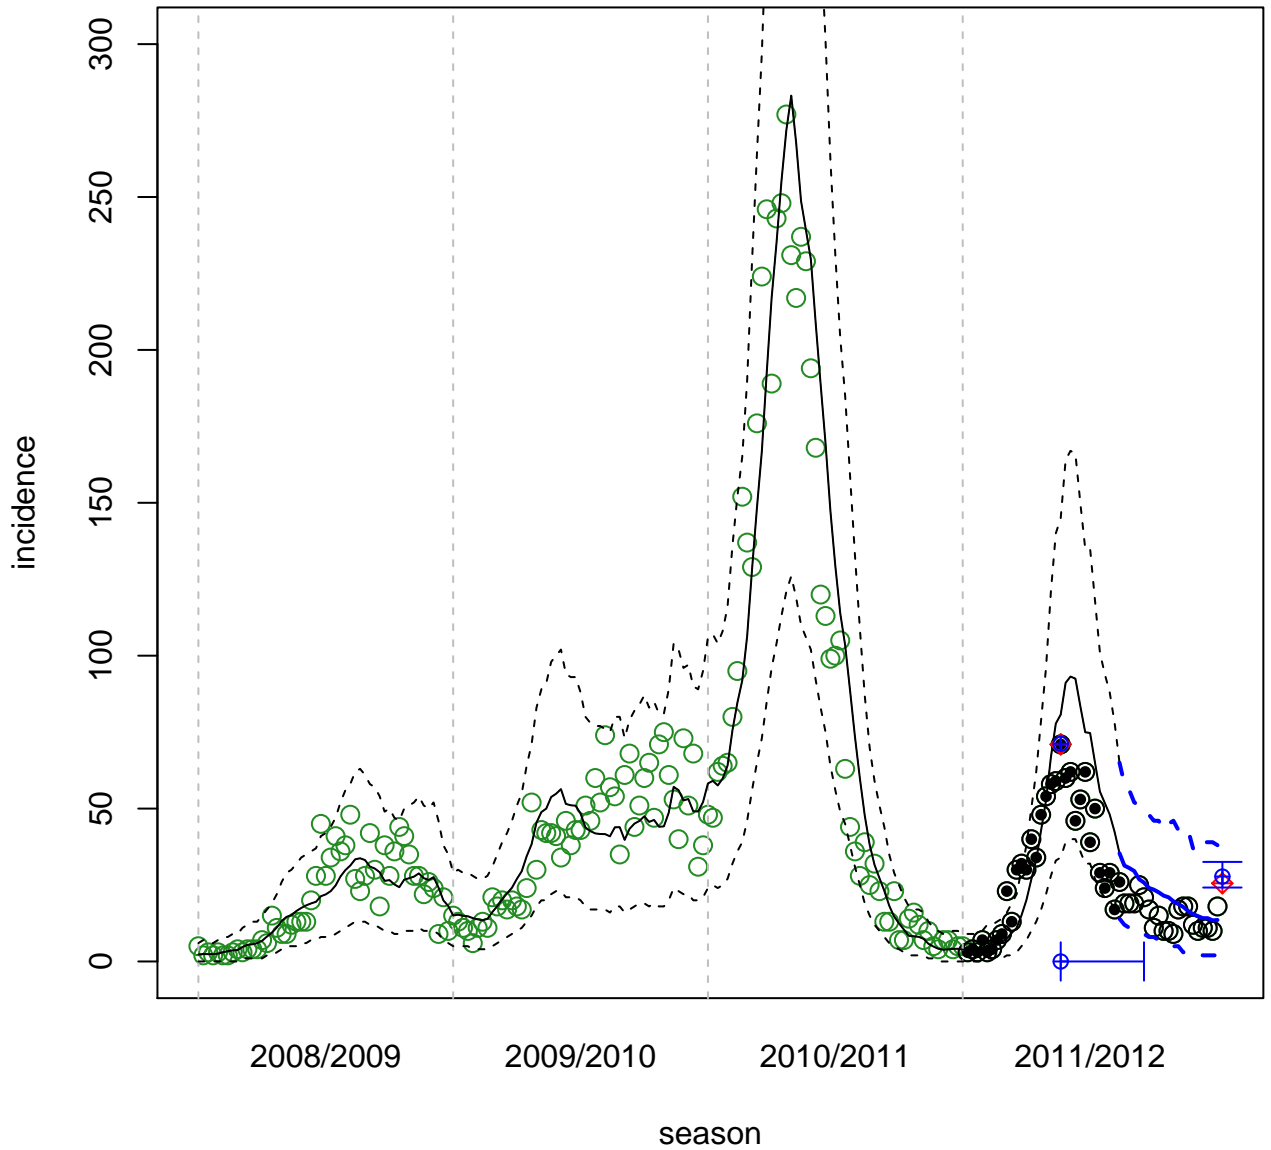

# sanjuan incidence

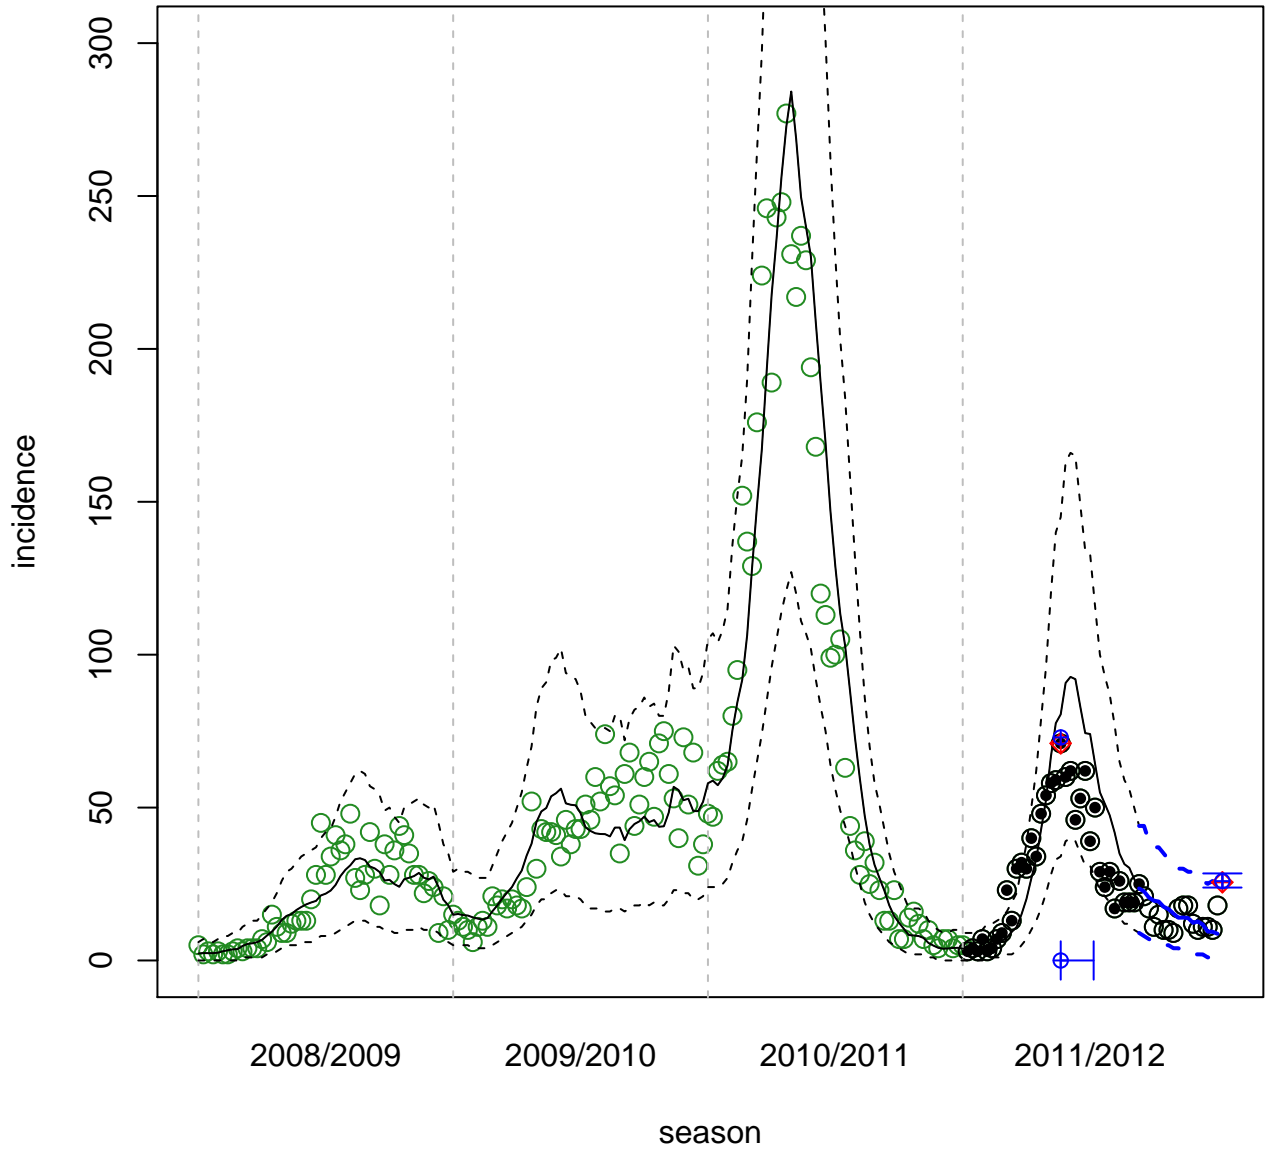



# sanjuan incidence

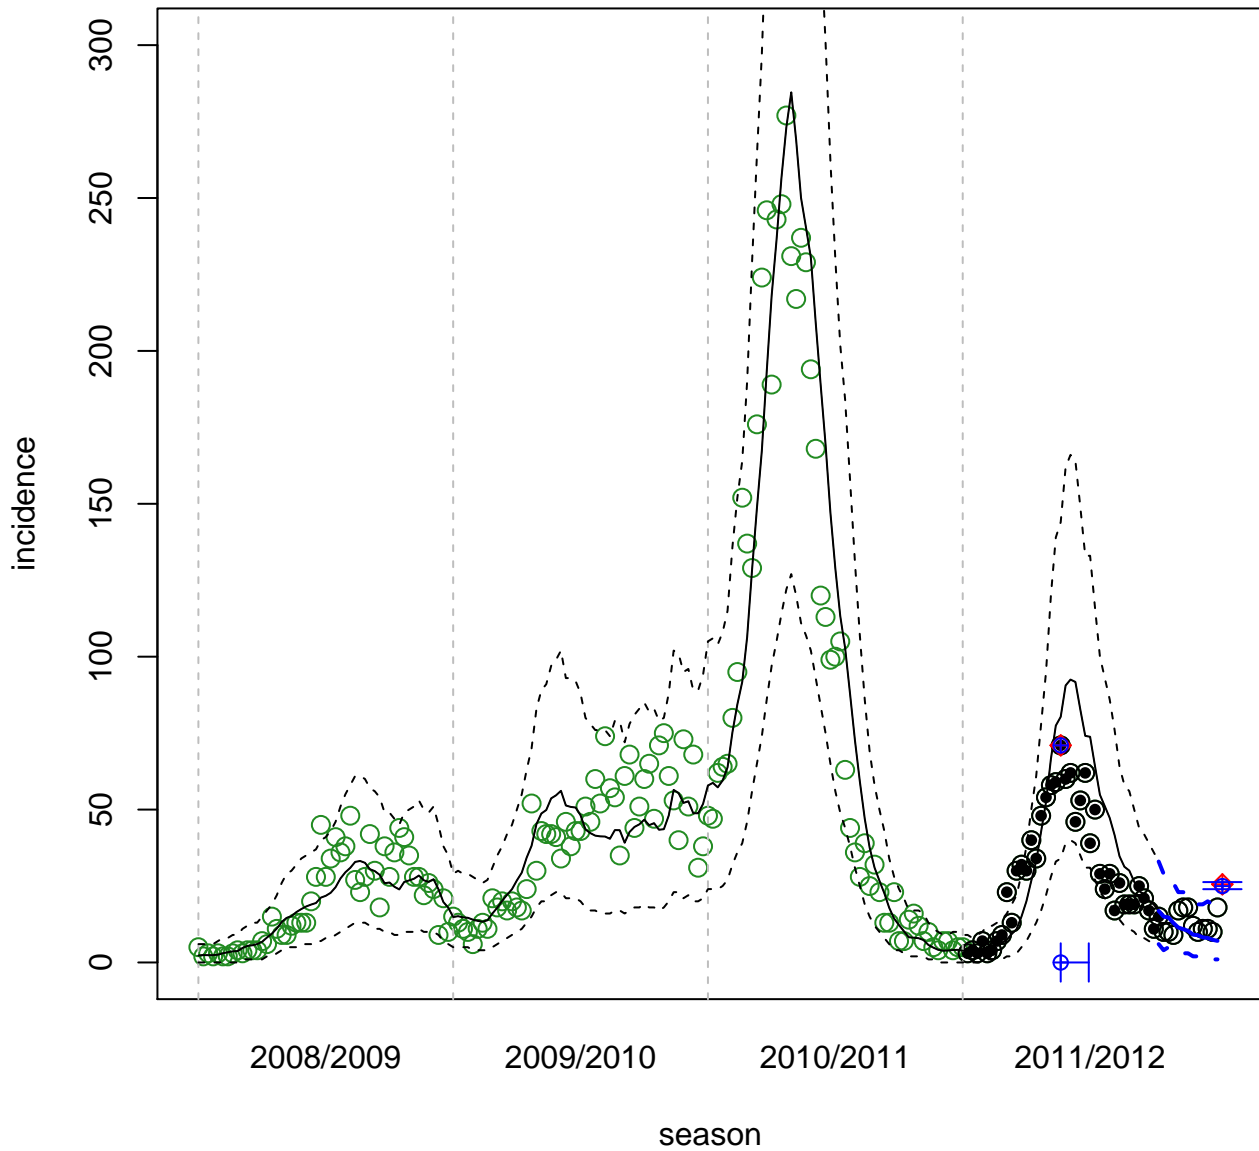



# sanjuan incidence

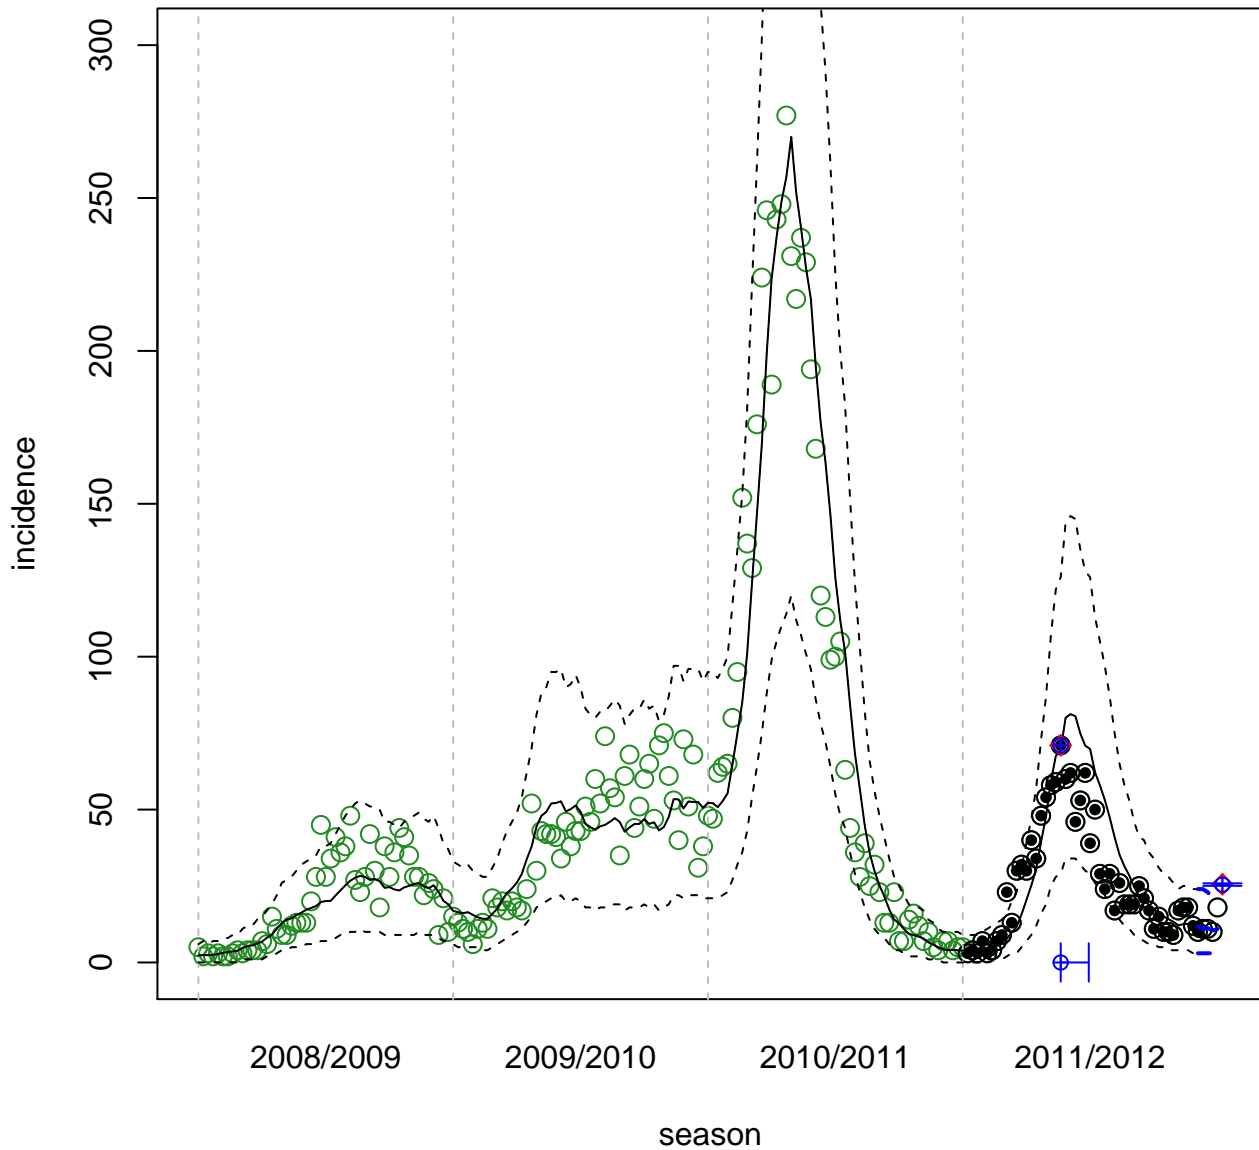

# sanjuan incidence

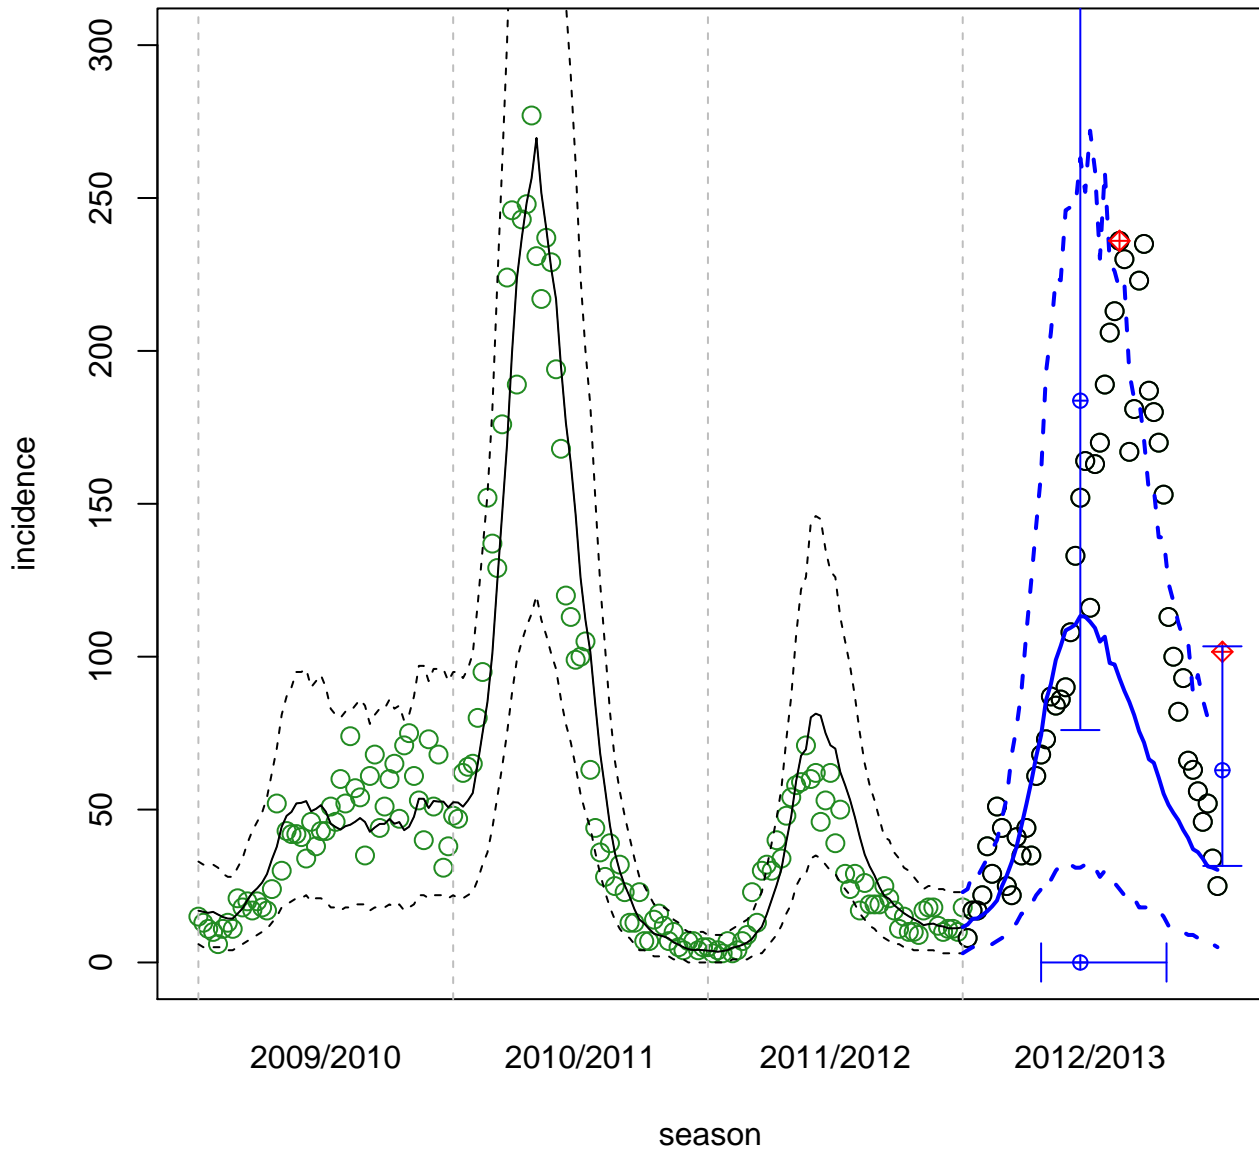

# sanjuan incidence

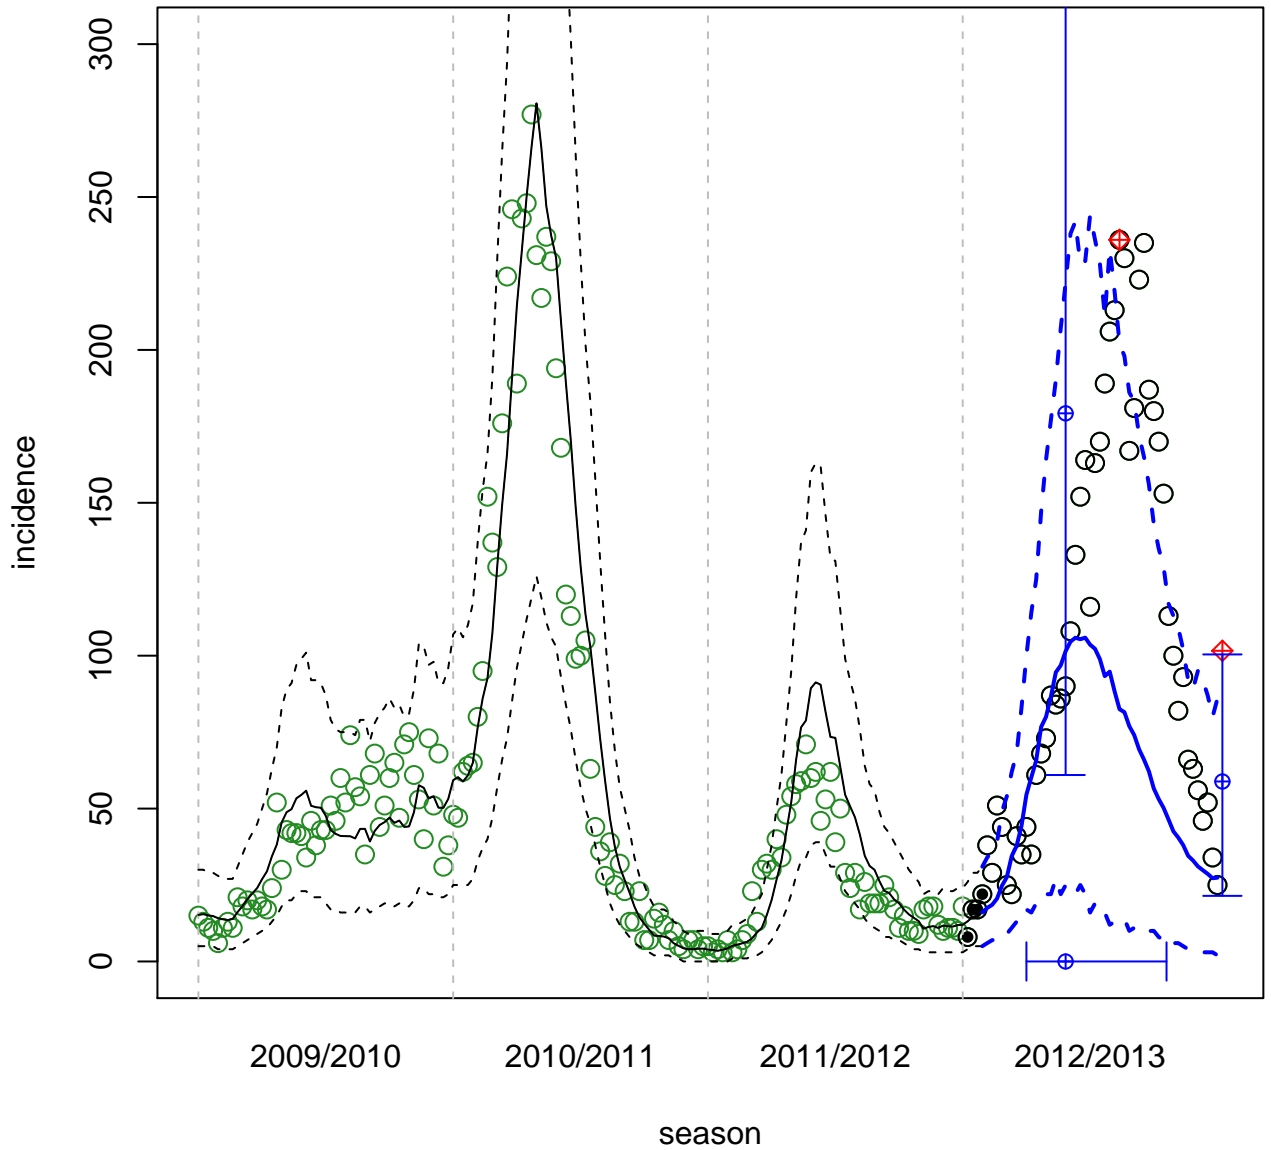

# sanjuan incidence

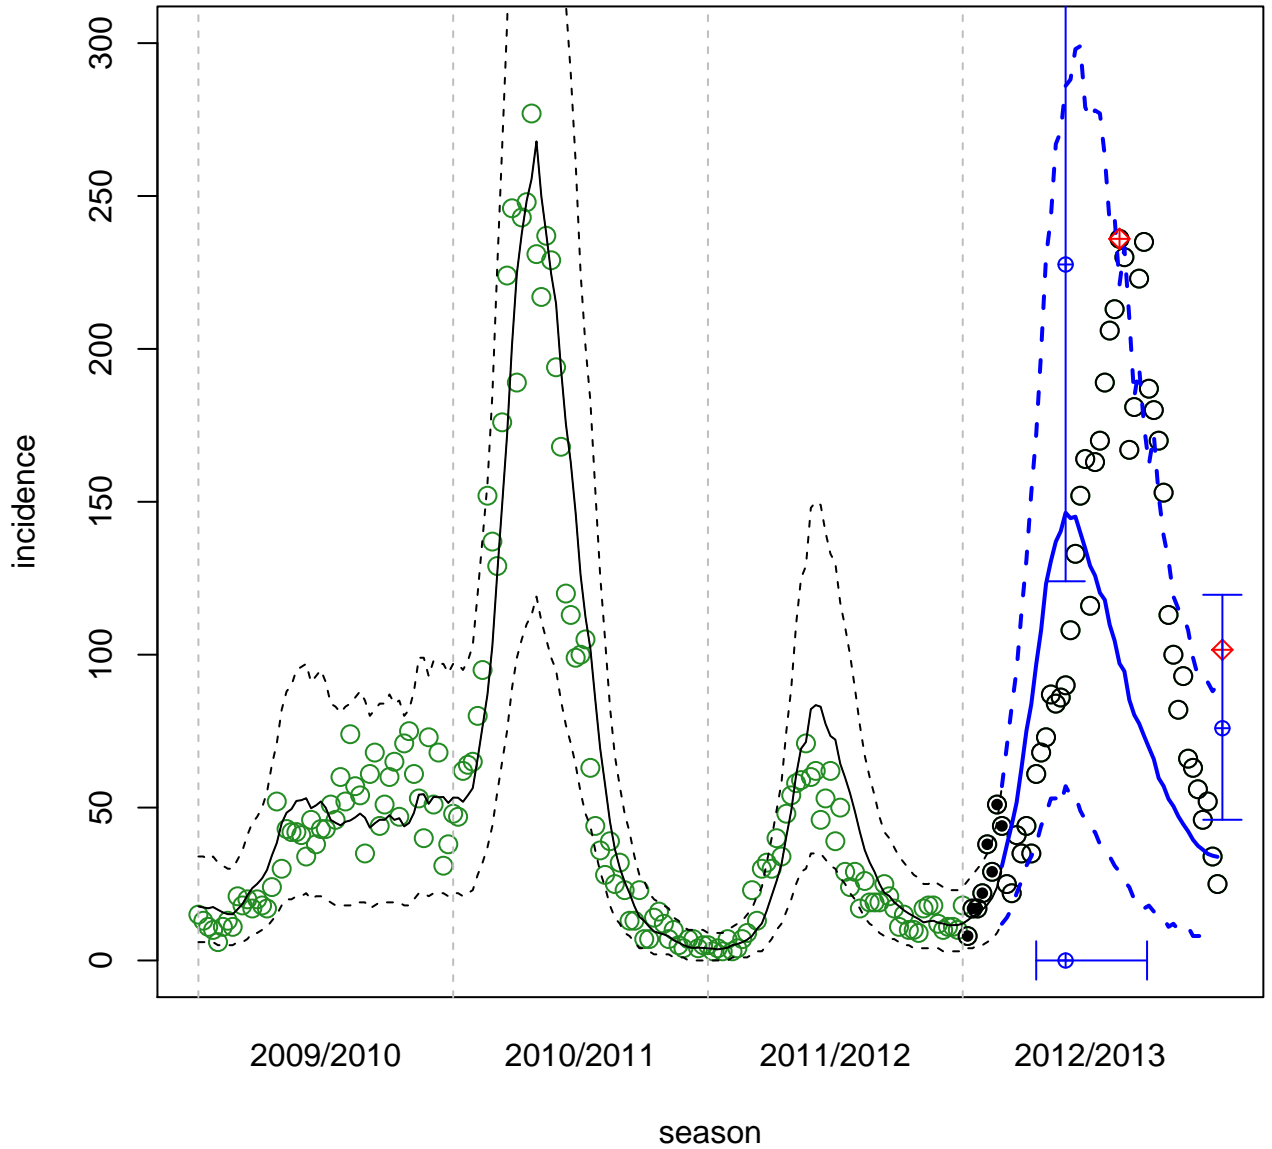

# sanjuan incidence

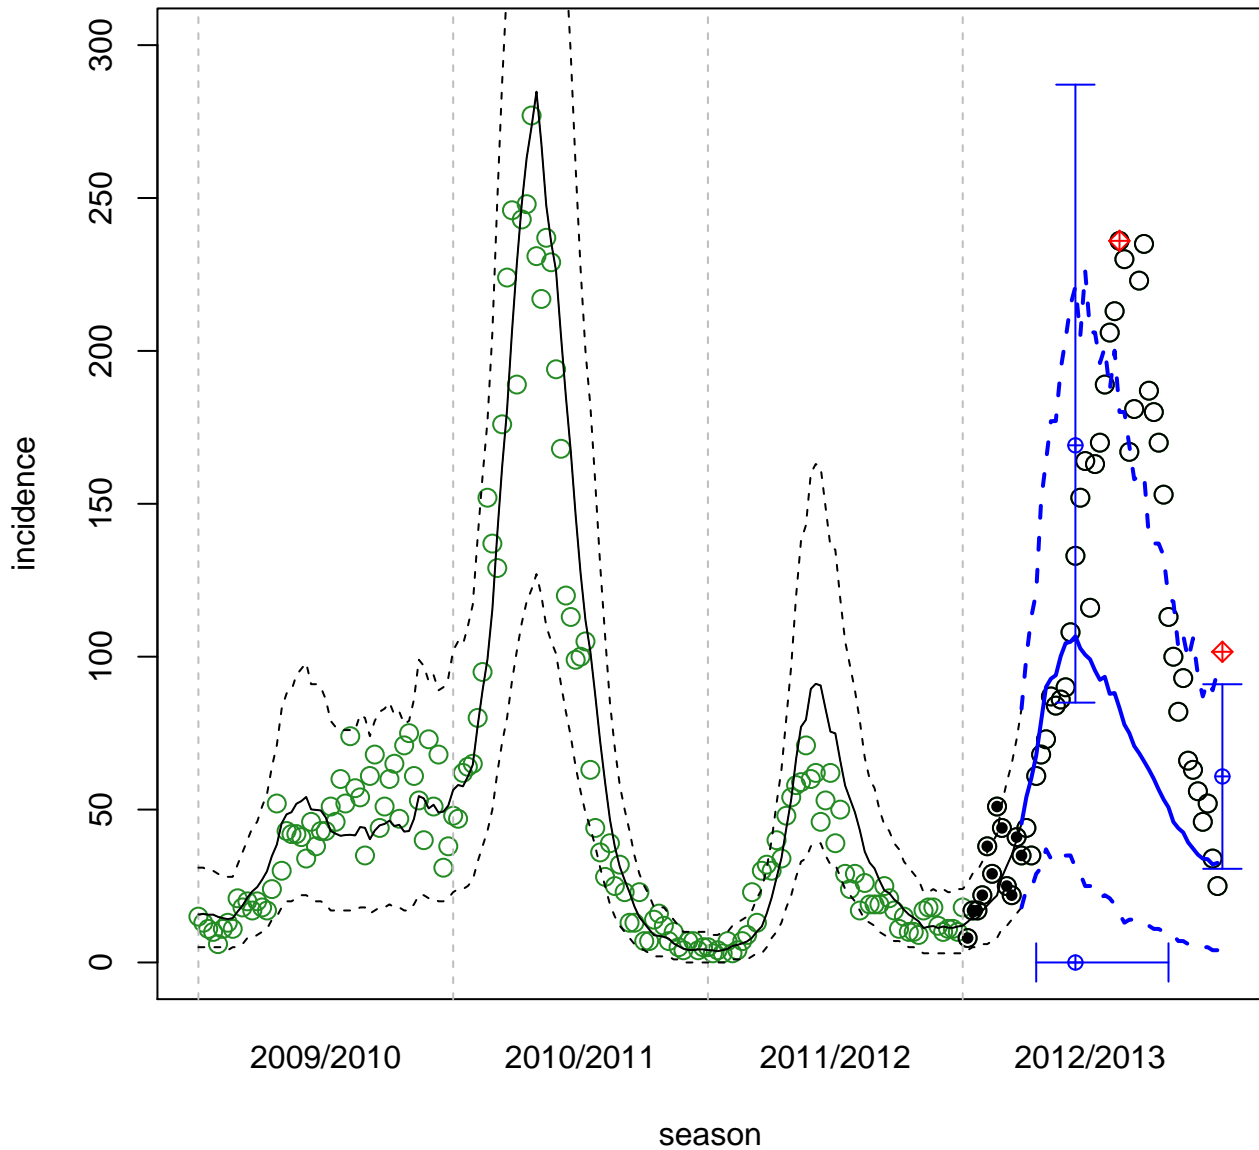

# sanjuan incidence

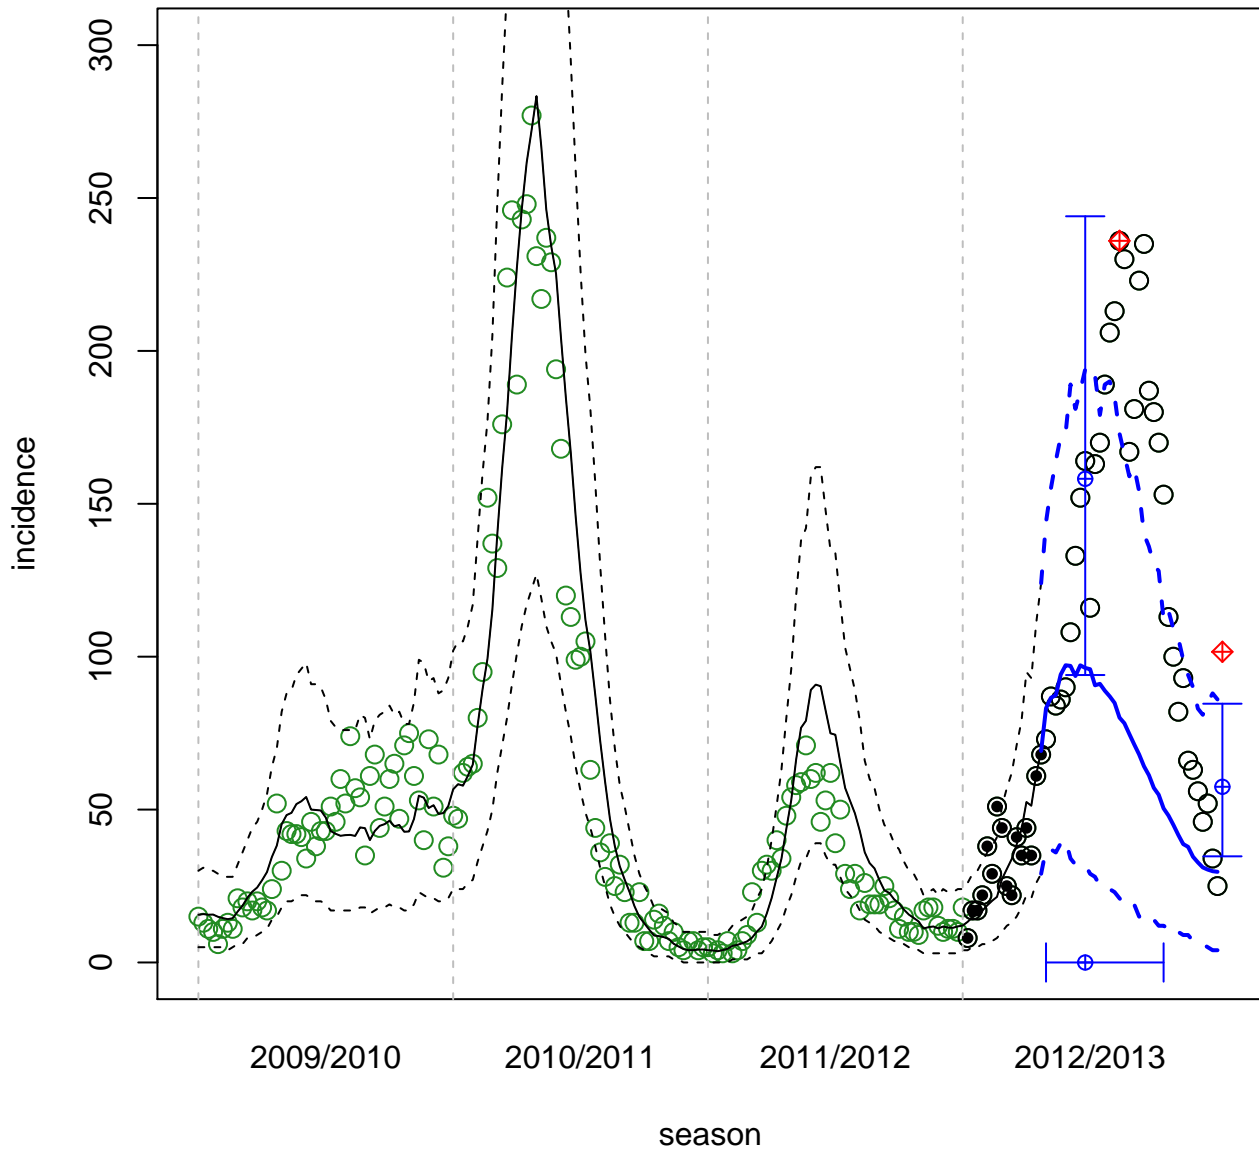



# sanjuan incidence

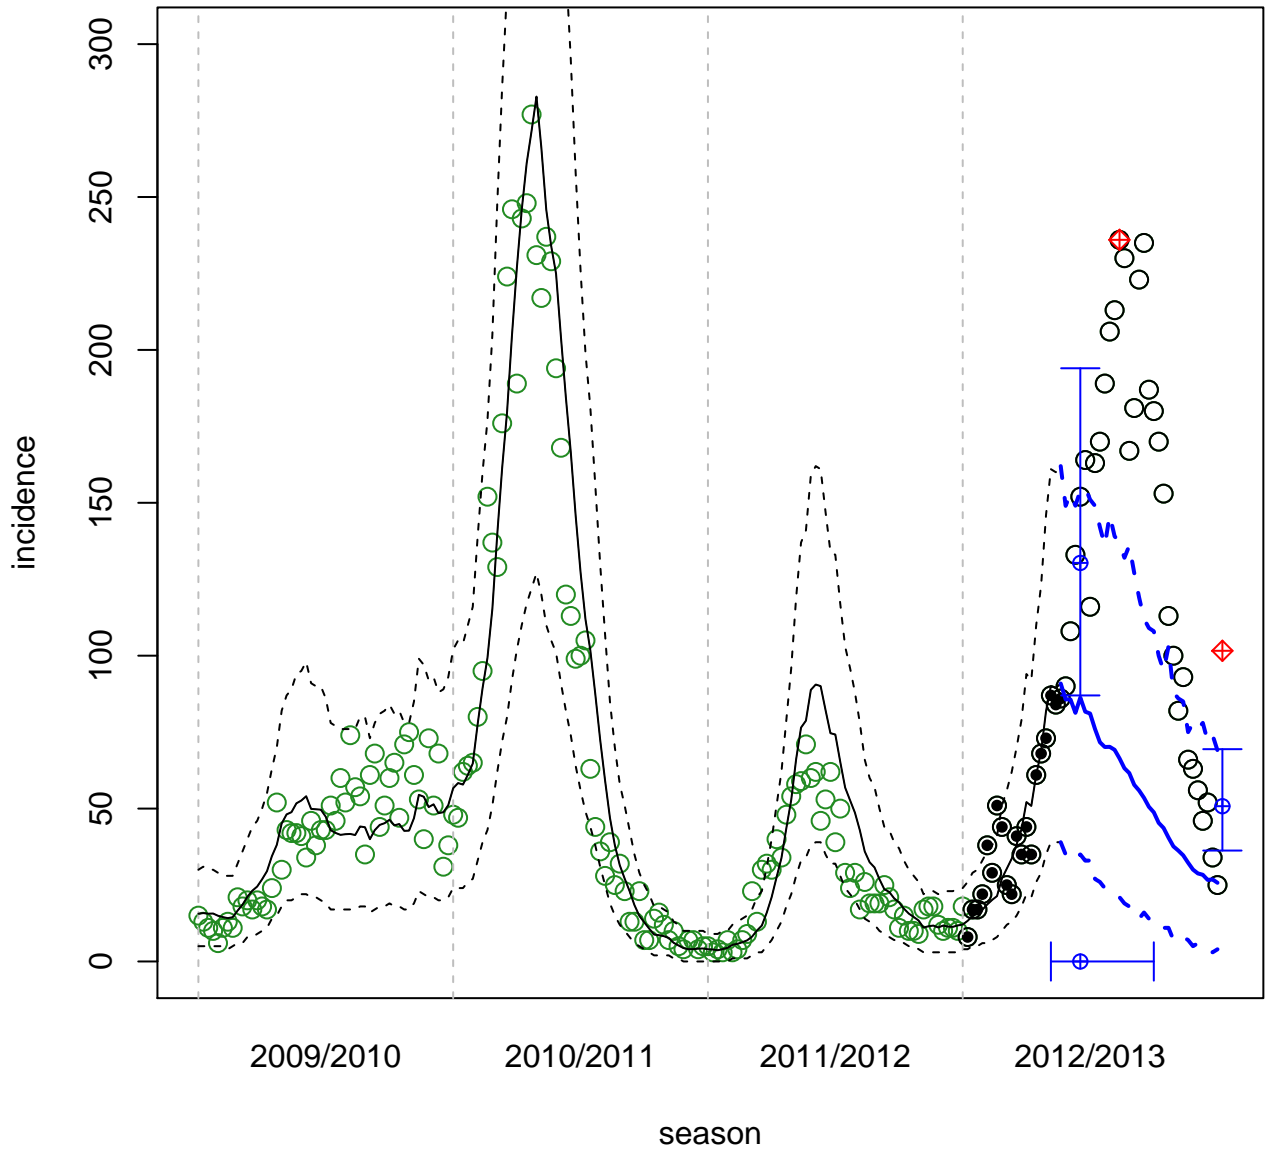

# sanjuan incidence

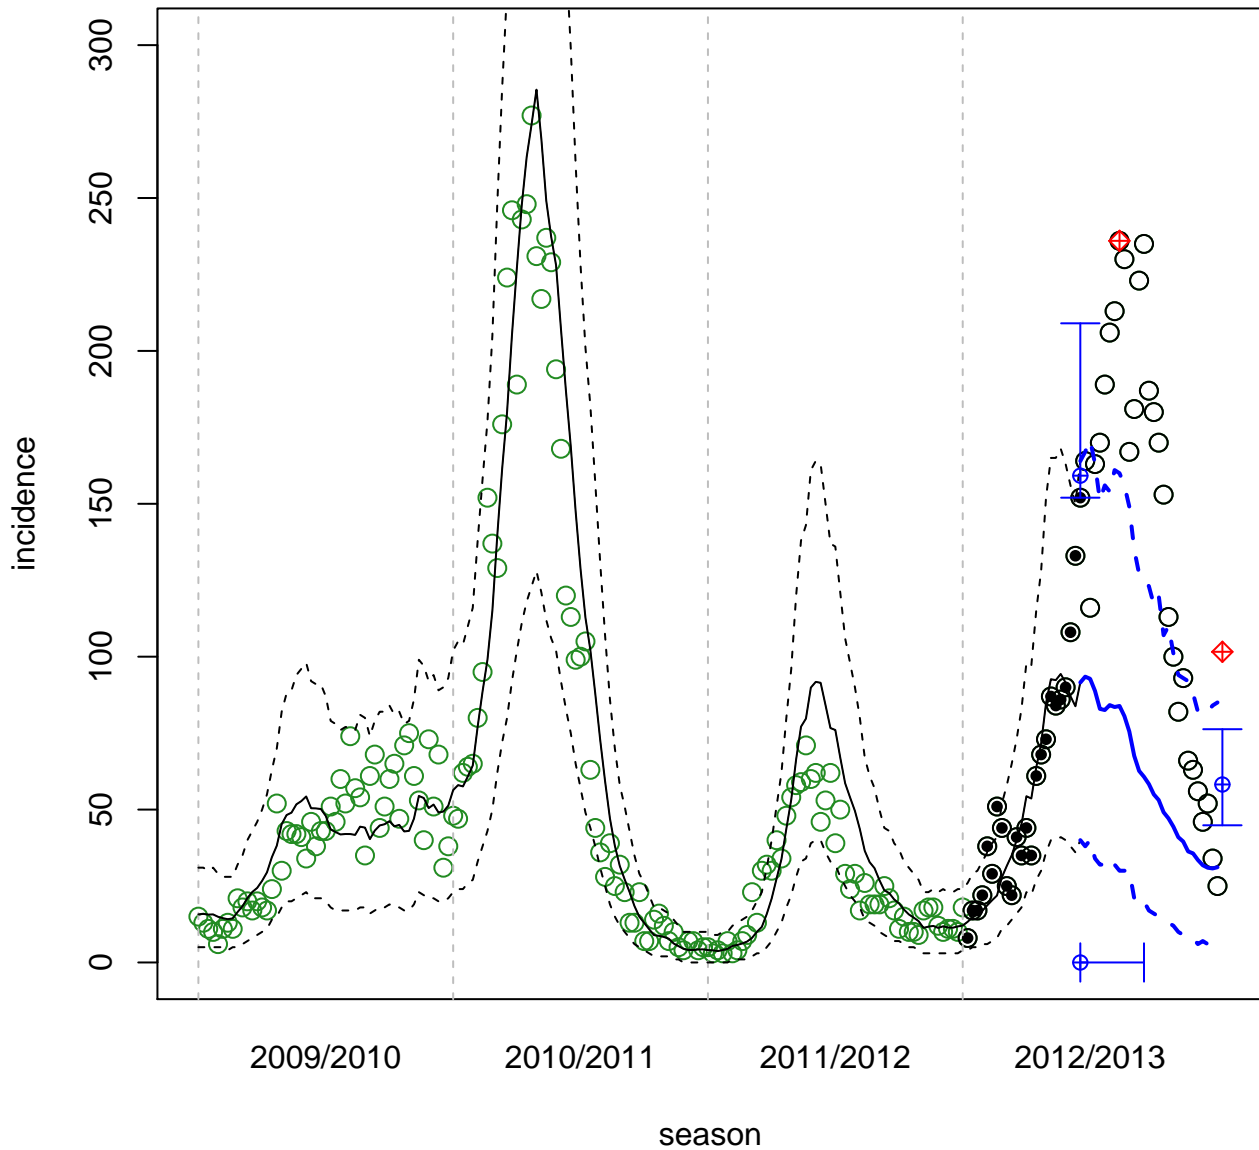

# sanjuan incidence

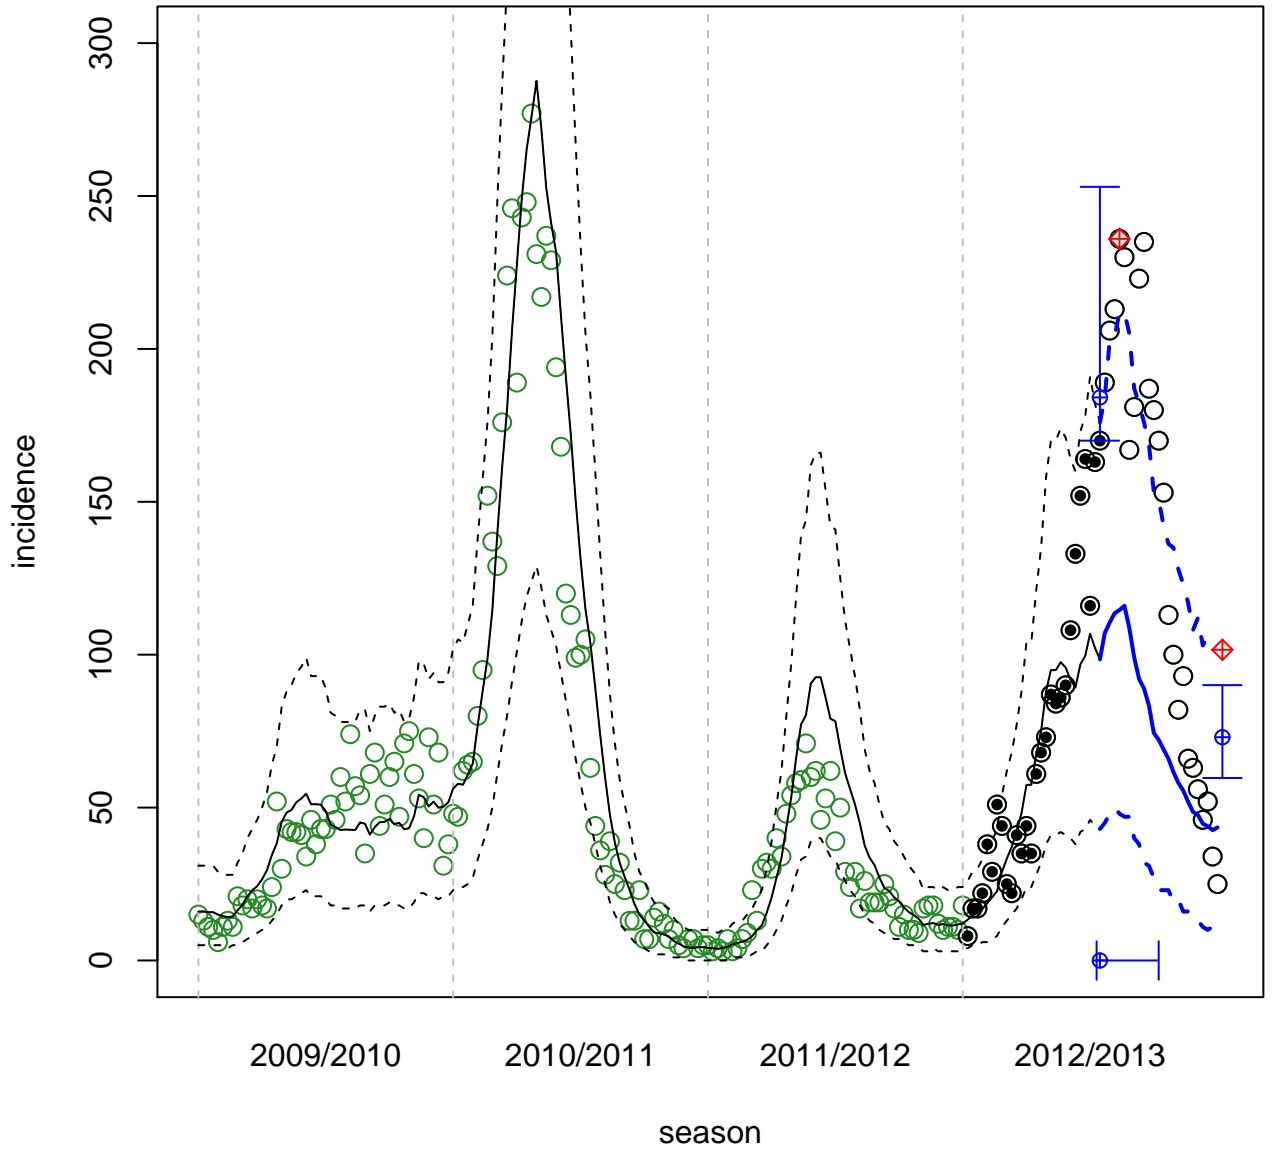

# sanjuan incidence

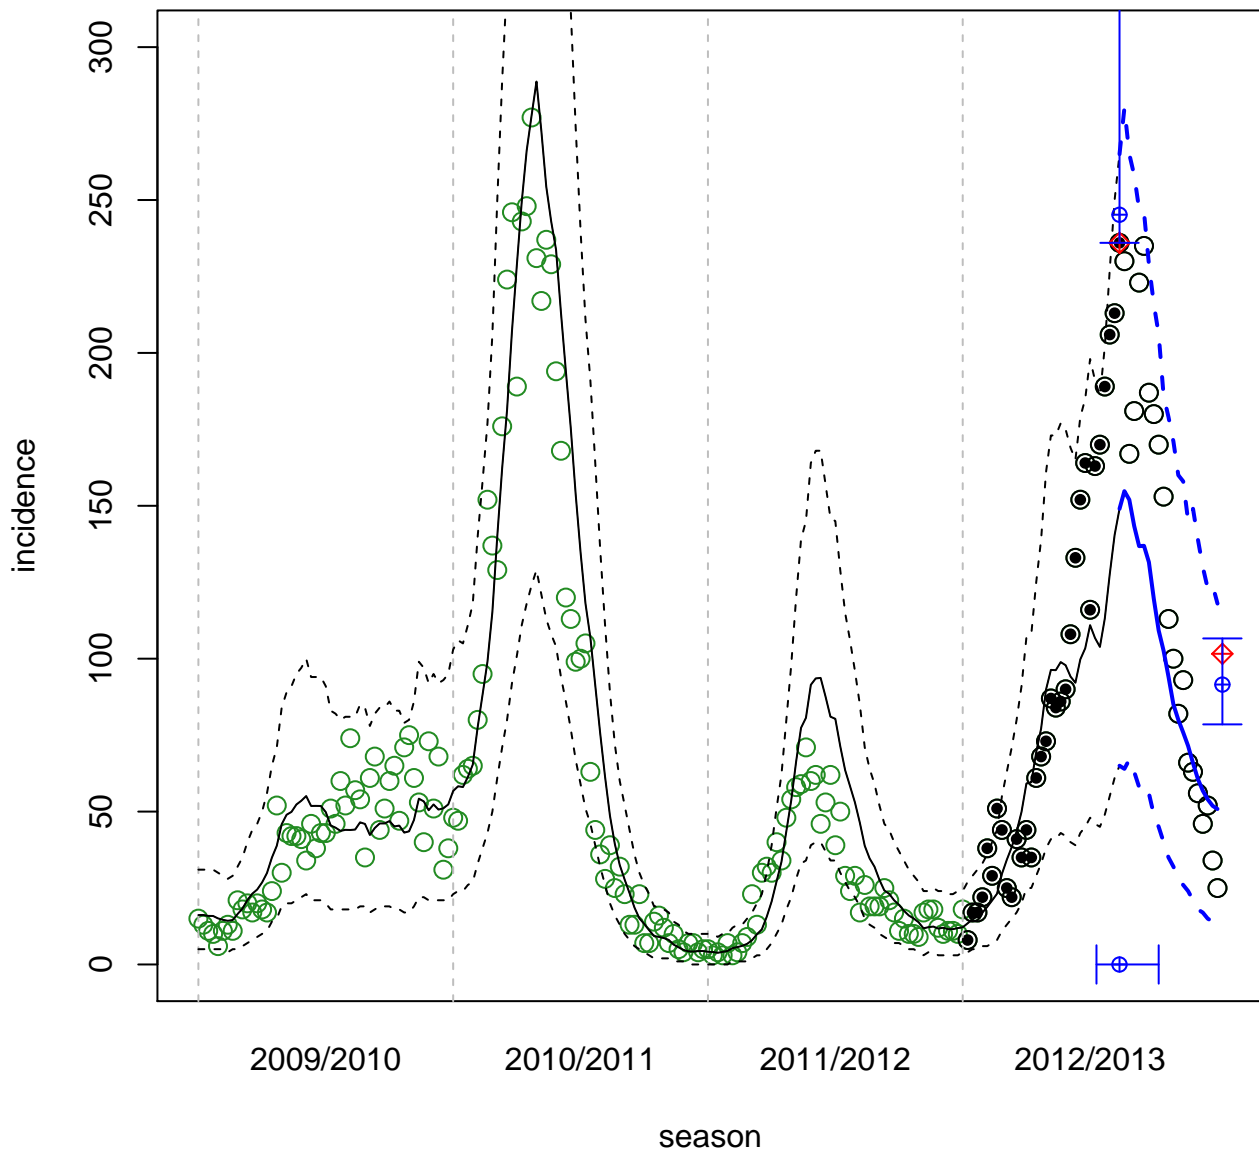

# sanjuan incidence

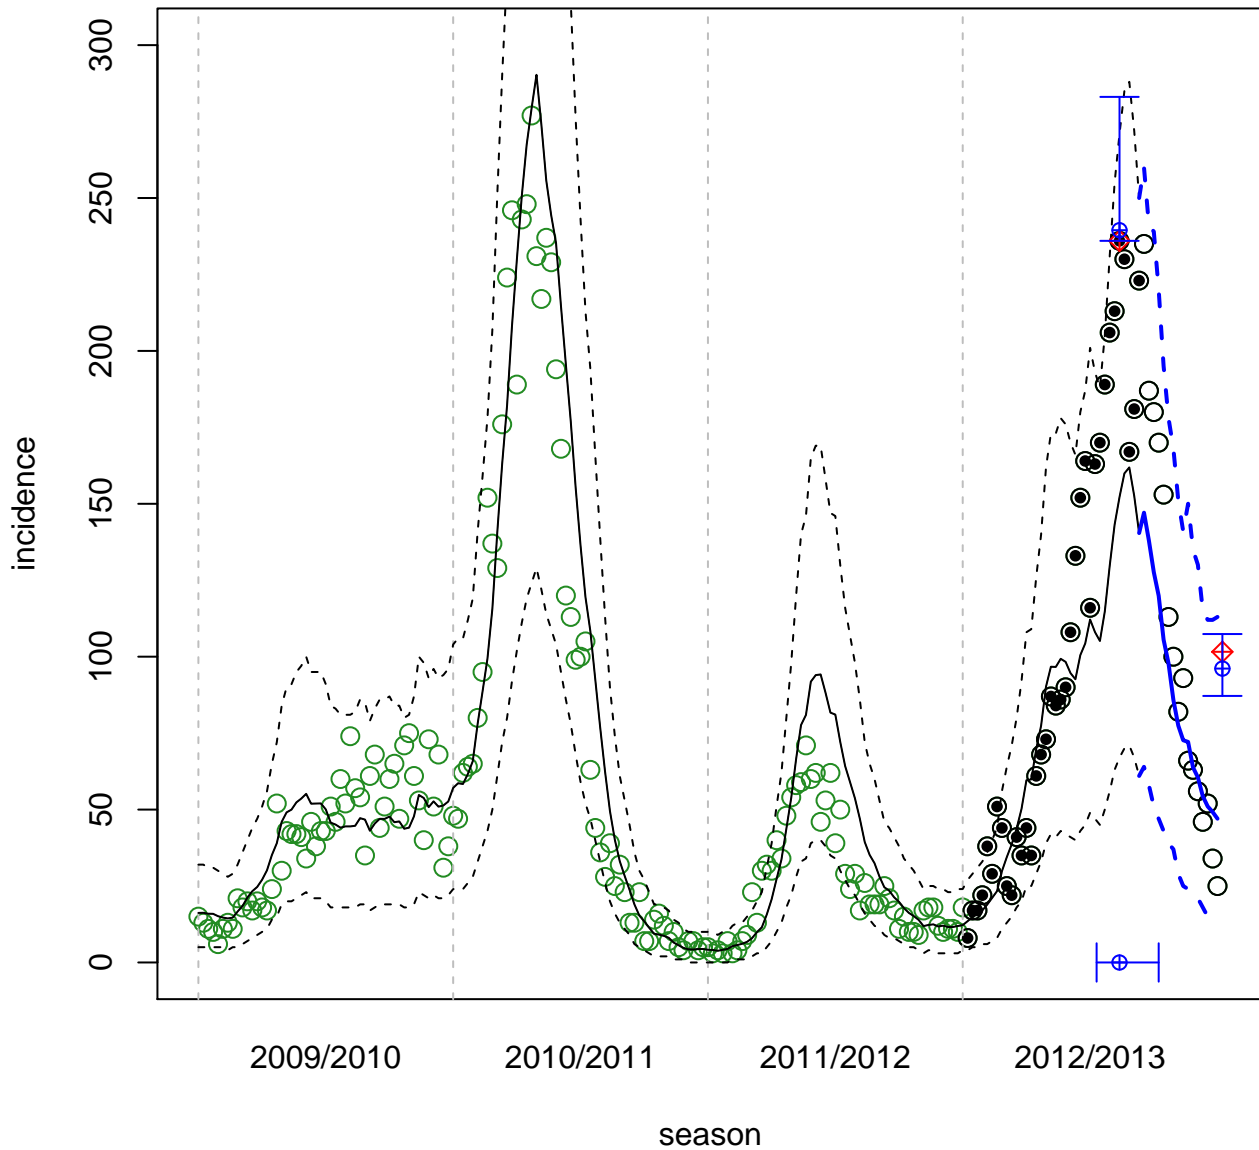

# sanjuan incidence

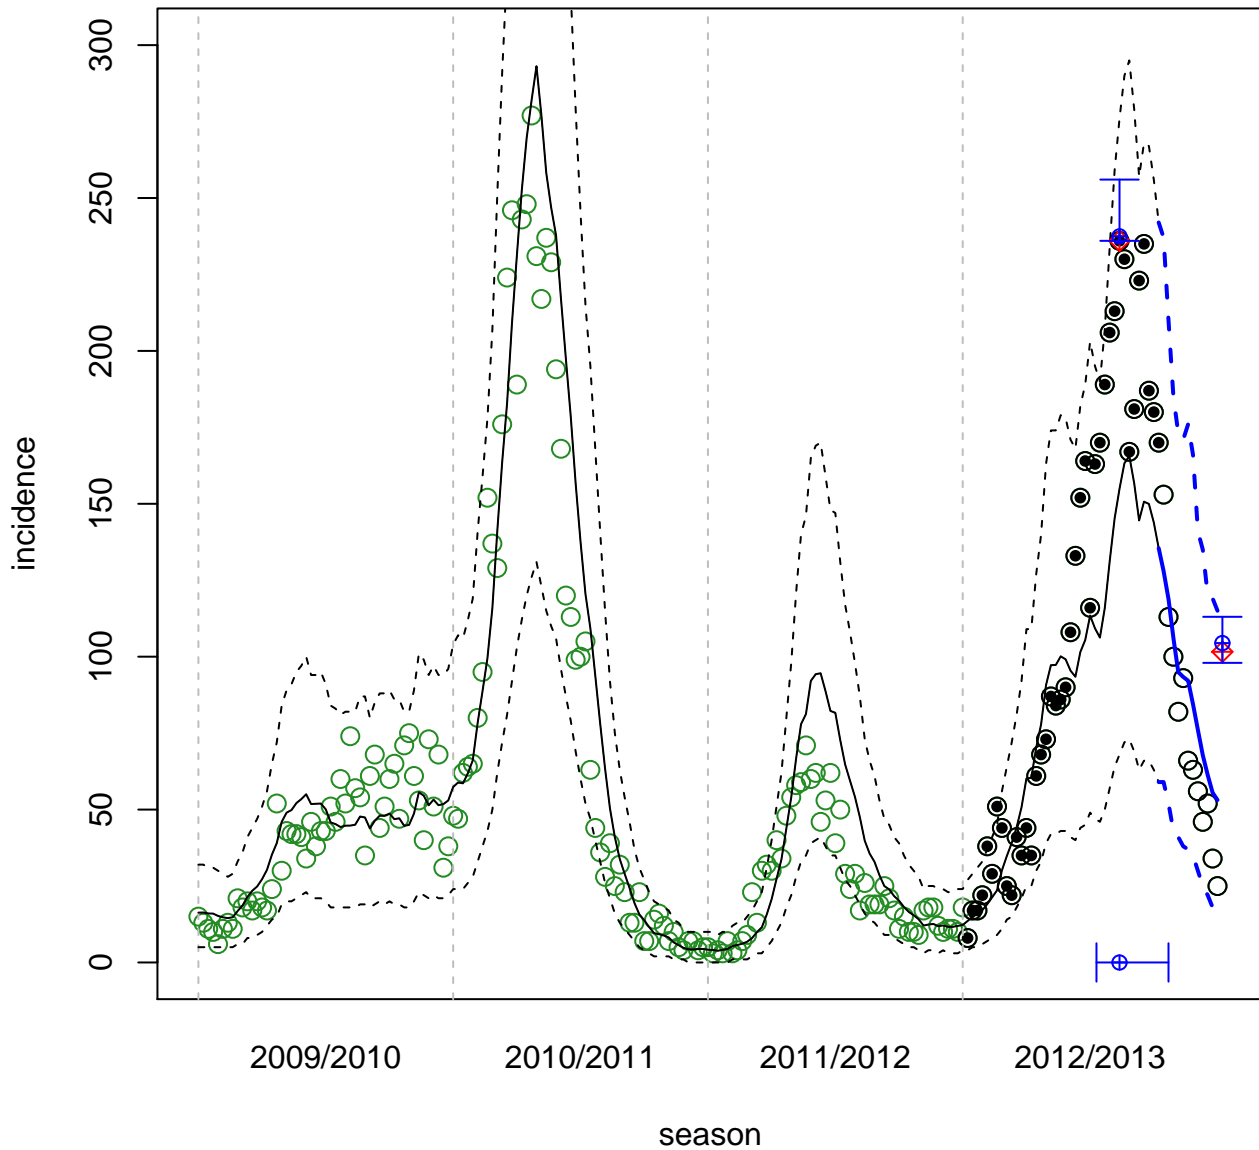

# sanjuan incidence

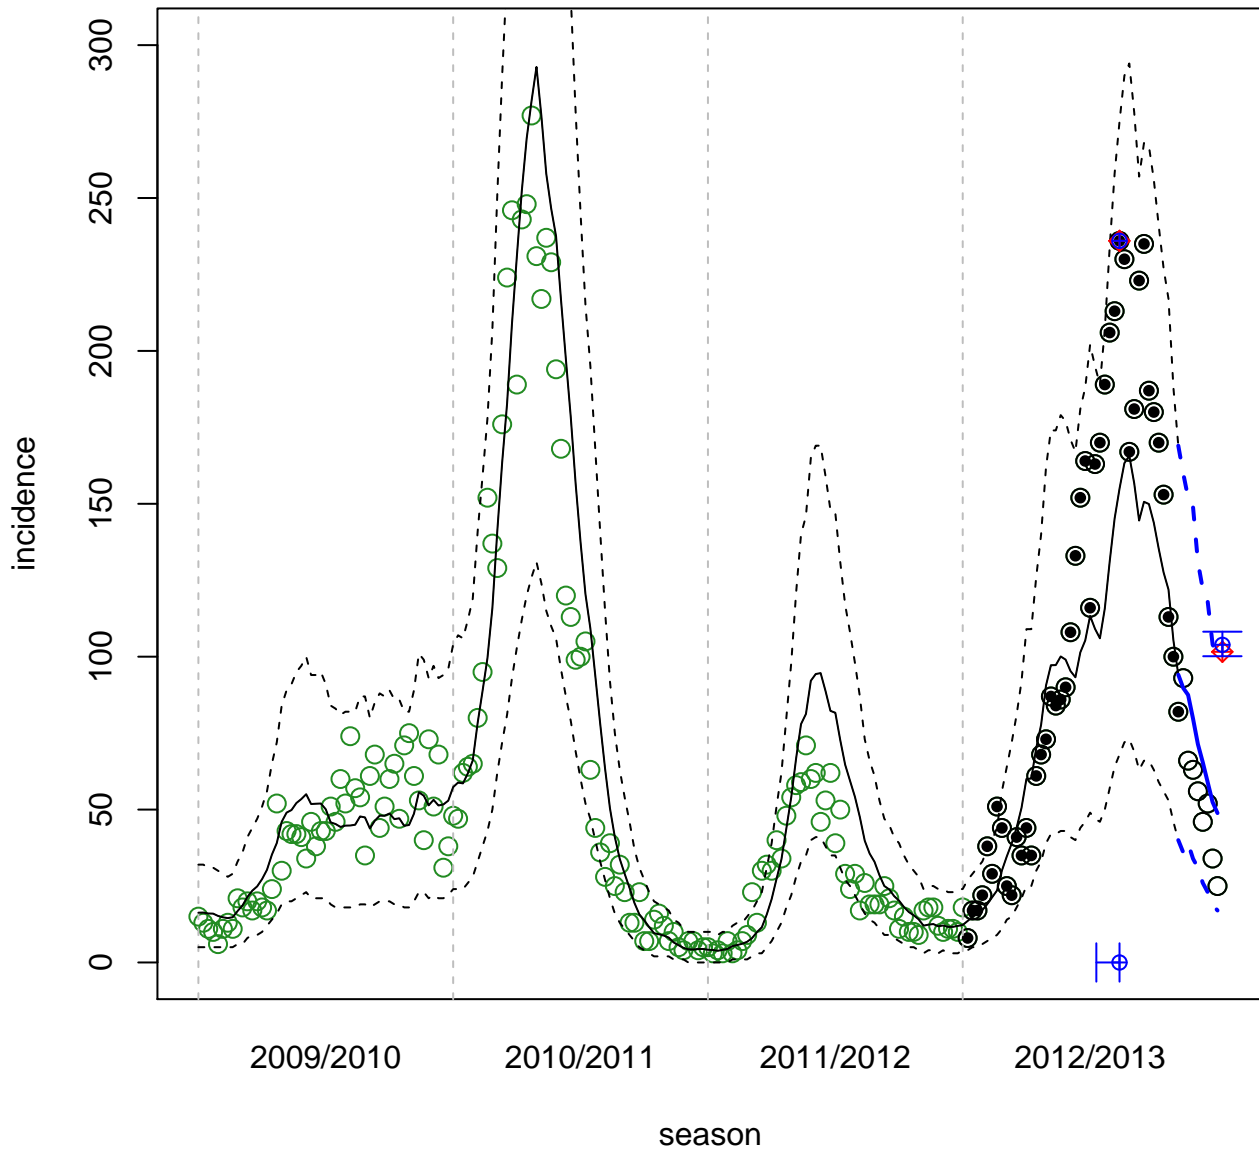

# sanjuan incidence

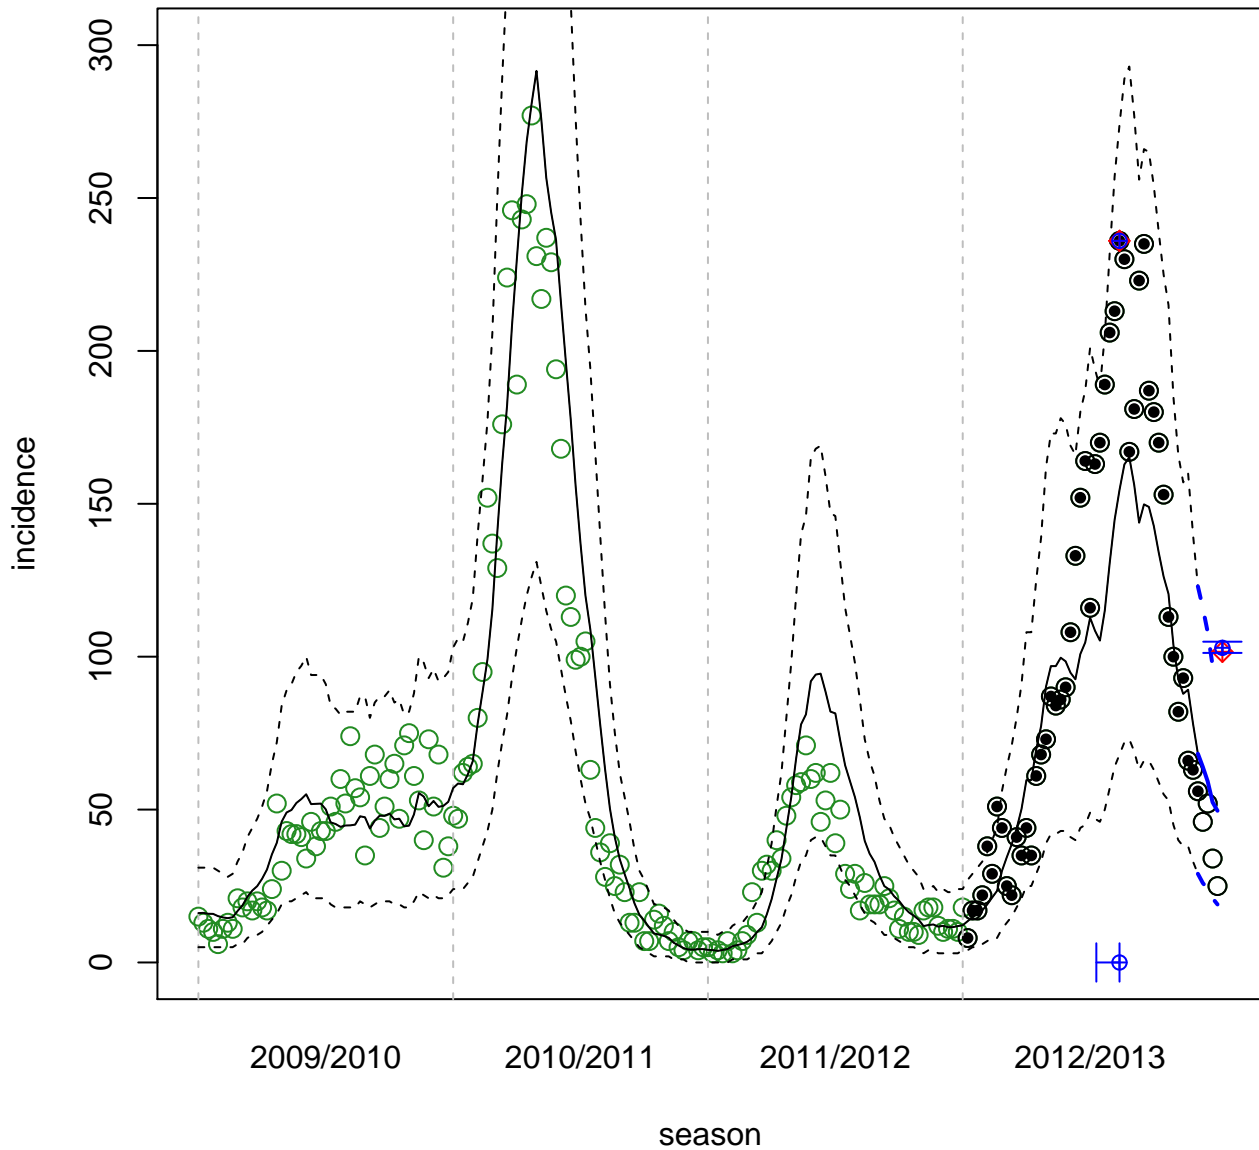

Supplement: NIHMS1932266-supplement-Supplemental_B.pdf [file NIHMS1932266-supplement-Supplemental_B.pdf]
